# Supplementary material for: Catalytic enantioselective Hosomi–Sakurai reaction of α-ketoesters promoted by chiral copper(ii) complexes
Source: Royal Society of Chemistry journal article supplement (doi:10.1039/c9cc01159e), 2019-01-01
Supplement: c9cc01159e1.pdf [file c9cc01159e1.pdf]

## Electronic Supplementary Information

### Catalytic Enantioselective Hosomi–Sakurai Reaction of $\alpha$ -Ketoesters Promoted by Chiral Copper(II) Complexes

Yutaro Niwa, Mayu Miyake, Ichiro Hayakawa, Akira Sakakura\*

*Graduate School of Natural Science and Technology, Okayama University, 3-1-1, Tsushima-naka, Kita-ku, Okayama,  
Japan*

#### Table of Contents

|                                                                                                                                    |         |
|------------------------------------------------------------------------------------------------------------------------------------|---------|
| Table of Contents                                                                                                                  | S1      |
| General Methods                                                                                                                    | S2      |
| Synthesis of $\alpha$ -Keto Esters <b>2</b>                                                                                        | S3–S4   |
| Typical Procedure of Nucleophilic Addition of Allyltrimethylsilane                                                                 | S5–S8   |
| Typical Procedure of Nucleophilic Addition of Methallyltrimethylsilane                                                             | S9–S15  |
| Examination Solvents for the Nucleophilic Addition of Allyltrimethylsilane with <b>2a</b>                                          | S16     |
| Catalytic Activities of Chiral Copper(II) Complexes in the Enantioselective<br>Addition of <b>2a</b> with Methallyltrimethylsilane | S17     |
| Transformation of <b>3d</b> and <b>4d</b>                                                                                          | S18–S19 |
| Proposed Mechanism of Generation of Silyl Ether <b>3</b>                                                                           | S19     |
| References                                                                                                                         | S20     |
| <sup>1</sup> H and <sup>13</sup> C NMR Charts of New Compounds                                                                     | S21–S66 |
| Chiral HPLC Charts of New Compounds                                                                                                | S67–S88 |

## General Methods.

IR spectra were recorded on a SHIMADZU FTIR-8400 spectrometer.  $^1\text{H}$  NMR spectra were measured on a Varian NMR System 600 PS600 spectrometer (600 MHz), a Varian 400-MR ASW spectrometer (400 MHz), and a Varian Mercury-300 spectrometer (300 MHz) at ambient temperature. Data were recorded as follows: chemical shift in ppm from the solvent resonance employed as the internal standard ( $\text{CHCl}_3$  at 7.26 ppm) on the  $\delta$  scale, multiplicity (s = singlet; d = doublet; t = triplet; m = multiplet), coupling constant (Hz), and integration.  $^{13}\text{C}$  NMR spectra were measured on a Varian NMR System 600 PS600 spectrometer (150 MHz) and a Varian 400-MR ASW spectrometer (100 MHz) at ambient temperature. Chemical shifts were recorded in ppm from the solvent resonance employed as the internal standard ( $\text{CDCl}_3$  at 77.0 ppm). Analytical HPLC was performed on a JASCO model PU-980 intelligent HPLC pump, a JASCO model UV-970 intelligent UV-vis detector (254 nm), and a JASCO model MD-2018 Plus photodiode array detector using a column of Daicel CHIRALPAK AD-H ( $4.6 \times 250$  mm), YMC CHIRAL Amylose-SA ( $4.6 \times 250$  mm), and YMC CHIRAL Cellose-SB ( $4.6 \times 250$  mm). Optical rotations were measured on a digital polarimeter Horiba SEPA-300 using a  $3.5 \text{ mm} \times 0.5 \text{ dm}$  pyrex cell. For TLC analysis, Merck precoated TLC plates (silica gel 60 F<sub>254</sub> 0.25 mm) were used. For preparative column chromatography, Kanto Chemical Co., Inc. silica gel 60 N (spherical, neutral), Fuji Silysia Chemical PSQ100B, and Kanto Chemical Co., Inc. silica gel 60 (spherical)  $\text{NH}_2$  were used. High resolution mass spectral analysis (HRMS) was measured on a JEOL JMS-700 Mstation (FAB) and a Bruker micrOTOF II (ESI) at Chemical Instrument Facility, Okayama University.

Dry tetrahydrofuran, dichloromethane, isopropyl alcohol, and acetonitrile were purchased from Kanto Chemical Co., Inc. or Wako Pure Chemical Industries Ltd. as the “anhydrous” and stored under nitrogen. Nitroethane was freshly distilled from calcium hydride. Allyltrimethylsilanes (Aldrich or TCI), methallyltrimethylsilane (TCI), allyltriisopropylsilane (TCI), copper(II) triflate [ $\text{Cu}(\text{OTf})_2$ ] (Aldrich), (*S,S*)-*t*-Bu-bis(oxazoline) (**1c**, TCI), methyl 2-oxo-2-phenylacetate (**2h**, TCI) and other materials were obtained from commercial supplies and used without further purification. Copper(II) trifluoromethanesulfonimide [ $\text{Cu}(\text{NTf}_2)_2$ ],<sup>1</sup> **1a**,<sup>2</sup> **1b**,<sup>2</sup> **1d**,<sup>3</sup> **1e**,<sup>4</sup> and **1f**<sup>4</sup> were reported previously.

## Synthesis of $\alpha$ -Keto Esters 2.

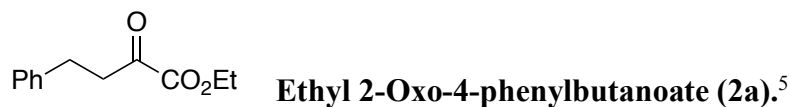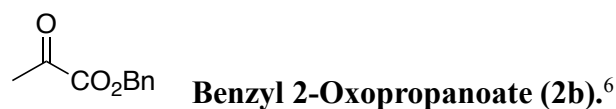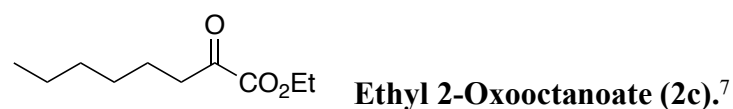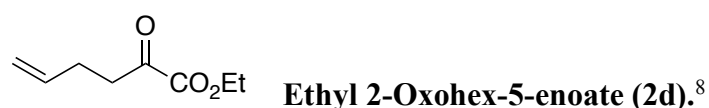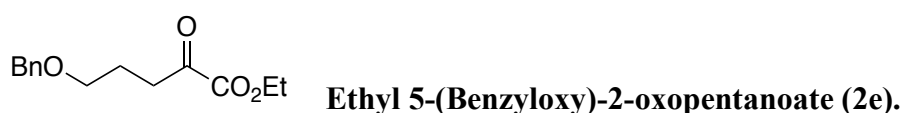

An oven-dried two-necked flask was charged with magnesium turnings (191 mg, 7.84 mmol). The flask was heated by heat gun under reduced pressure for 15 min with vigorous stirring. The resultant activated magnesium was suspended in THF (3.0 mL). To a stirred suspension of activated magnesium in THF were added 3-bromotoluene (0.67 mL, 5.5 mmol) in THF (3.0 mL) and a trace amount of iodine at ambient temperature. The mixture was stirred at ambient temperature for 30 min to give a THF solution of Grignard reagent.

To a stirred solution of diethyl oxalate (0.80 mL, 5.9 mmol) in THF (18 mL) was slowly added above-mentioned THF solution of Grignard reagent via syringe at  $-78$  °C. After being stirred  $-78$  °C for 1.5 h, the mixture was warmed to  $0$  °C and diluted with saturated aqueous  $\text{NH}_4\text{Cl}$  (10 mL). The resultant mixture was extracted with  $\text{Et}_2\text{O}$  ( $3 \times 10$  mL). The combined extracts were dried ( $\text{MgSO}_4$ ), filtered, and concentrated. The crude product was purified by column chromatography on silica gel (35 g, hexane– $\text{EtOAc}$  10 : 1) to give **2e** (606 mg, 41%) as a yellow oil.

IR (film) 2932, 2862, 1724, 1452, 1273, 1103  $\text{cm}^{-1}$ ;  $^1\text{H}$  NMR (400 MHz,  $\text{CDCl}_3$ )  $\delta$  7.36–7.27 (m, 5H), 4.46 (s, 2H), 4.27 (q,  $J = 7.2$  Hz, 2H), 3.51 (t,  $J = 6.0$  Hz, 2H), 2.95 (t,  $J = 7.2$  Hz, 2H), 2.02–1.97 (m, 2H), (t,  $J = 7.2$  Hz, 3H);  $^{13}\text{C}$  NMR (150 MHz,  $\text{CDCl}_3$ )  $\delta$  194.0, 167.8, 138.0, 128.2 (2C), 127.4 (2C), 127.4, 72.6, 68.7, 62.1, 36.1, 23.8, 13.8; HRMS (ESI) calcd for  $\text{C}_{14}\text{H}_{18}\text{NaO}_4$   $[\text{M}+\text{Na}]^+$  273.1103, found 273.1109.

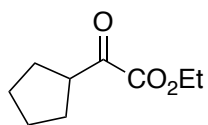

**Ethyl 2-Cyclopentyl-2-oxoacetate (2f).**<sup>9</sup>

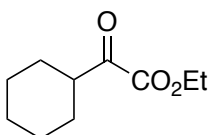

**Ethyl 2-Cyclohexyl-2-oxoacetate (2g).**<sup>10</sup>

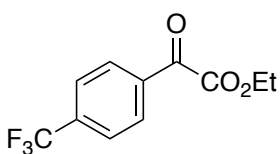

**Ethyl 2-Oxo-2-(4-(trifluoromethyl)phenyl)acetate (2i).**<sup>11</sup>

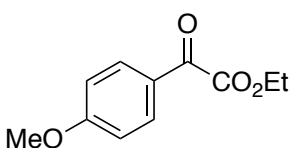

**Ethyl 2-(4-Methoxyphenyl)-2-oxoacetate (2j).**<sup>11</sup>

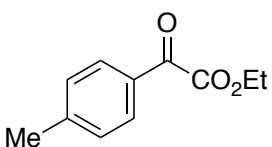

**Ethyl 2-Oxo-2-(*p*-tolyl)acetate (2k).**<sup>12</sup>

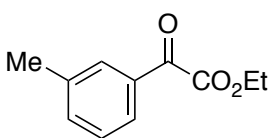

**Ethyl 2-Oxo-2-(*m*-tolyl)acetate (2l).**<sup>10</sup>

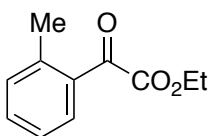

**Ethyl 2-Oxo-2-(*o*-tolyl)acetate (2m).**<sup>12</sup>

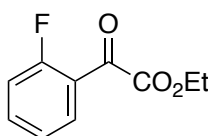

**Ethyl 2-(2-Fluorophenyl)-2-oxoacetate (2n).**<sup>13</sup>

### Typical Procedure of Nucleophilic Addition of Allyltrimethylsilane with $\alpha$ -Keto Ester **2a** promoted by **1a**•Cu(NTf<sub>2</sub>)<sub>2</sub> (Table 1, entry 1).

Copper(II) trifluoromethanesulfonimide (6.2 mg, 0.010 mmol) and ligand **1a** (4.2 mg, 0.010 mmol) were combined in an argon atmosphere glove box. The sealed flask was then removed from the box and connected to a nitrogen balloon. Anhydrous EtNO<sub>2</sub> (1.0 mL) was added, whereupon a blue solution was formed within 5 minutes. The solution was stirred for 2 h at ambient temperature.  $\alpha$ -Keto ester **2a** (41.2 mg, 0.200 mmol) was added at ambient temperature. After allyltrimethylsilane (0.10 mL, 0.30 mmol) was added to the mixture, the resulting solution was stirred at ambient temperature for 2 h. The reaction was quenched by the addition of saturated aqueous NaHCO<sub>3</sub> (1 mL), and the mixture was extracted with Et<sub>2</sub>O (3 × 10 mL). The combined extracts were dried (MgSO<sub>4</sub>) and concentrated. After the resultant residue was dissolved in THF (2 mL), the mixture was cooled to 0 °C. Tetrabutylammonium fluoride (1.0 M solution in THF, 0.20 mL, 0.20 mmol) was added to the mixture. After being stirred at 0 °C for 1 h, the reaction mixture was diluted with saturated aqueous NH<sub>4</sub>Cl (1 mL) and extracted with EtOAc (3 × 10 mL). The combined extracts were dried (MgSO<sub>4</sub>) and concentrated. The resultant residue was purified by column chromatography on silica gel using hexane–EtOAc (20:1) to give **3a** (78% yield, 74% ee) as a colorless oil. The enantiomeric excess (ee) was determined through chiral HPLC analysis.

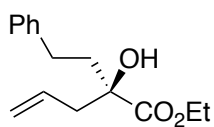

**Ethyl (*R*)-2-Hydroxy-2-phenethylpent-4-enoate (**3a**).** Colorless oil; [ $\alpha$ ]<sub>D</sub><sup>20</sup>

–25.9 (*c* 0.92, CHCl<sub>3</sub>) (74% ee); IR (film) 3522, 1730, 1224, 1182, 920 cm<sup>-1</sup>; <sup>1</sup>H NMR (400 MHz, CDCl<sub>3</sub>)  $\delta$  7.30–7.24 (m, 2H), 7.20–7.15 (m, 3H), 5.78 (tdd, *J* = 7.2, 11.2, 16.0 Hz, 1H), 5.13–5.08 (m, 2H), 4.24–4.14 (m, 2H), 3.32 (s, 1H), 2.81 (ddd, *J* = 5.2, 11.2, 13.2 Hz, 1H), 2.52–2.39 (m, 3H), 2.12–1.95 (m, 2H), 1.29 (t, *J* = 6.8 Hz, 3H); <sup>13</sup>C NMR (100 MHz, CDCl<sub>3</sub>)  $\delta$  175.9, 141.6, 132.2, 128.4 (3C), 128.3, 125.9, 119.0, 76.8, 61.9, 44.1, 40.5, 30.0, 14.3; HRMS (FAB) calcd for C<sub>15</sub>H<sub>21</sub>O<sub>3</sub> [M+H]<sup>+</sup> 249.1491, found 249.1508.

Enantiomeric excess was determined by chiral HPLC analysis: YMC CHIRAL Amylose-SA; hexane–*i*-PrOH 100:1; flow rate 0.3 mL/min; *t*<sub>R</sub> = 25.5 min (major enantiomer), 23.4 min (minor enantiomer);  $\lambda$  = 215 nm. Absolute configuration (*R*) was assigned by analogy with **3b**.

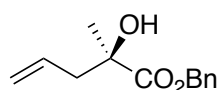

**Benzyl (*R*)-2-Hydroxy-2-methylpent-4-enoate (**3b**).** Colorless oil; [ $\alpha$ ]<sub>D</sub><sup>19</sup>

–3.9 (*c* 1.04, MeOH) (65% ee); IR (film) 3522, 1732, 1456, 1267, 1217, 1166, 920  $\text{cm}^{-1}$ ;  $^1\text{H}$  NMR (400 MHz,  $\text{CDCl}_3$ )  $\delta$  7.42–7.32 (m, 5H), 5.73 (tdd,  $J = 7.2, 10.0, 17.2$  Hz, 1H), 5.19 (s, 2H), 5.08 (m, 1H), 5.03 (m, 1H), 3.13 (s, 1H), 2.51 (dd,  $J = 7.2, 13.6$  Hz, 1H), 2.39 (tdd,  $J = 1.2, 7.2, 13.6$  Hz, 1H), 1.44 (s, 3H);  $^{13}\text{C}$  NMR (100 MHz,  $\text{CDCl}_3$ )  $\delta$  176.3, 135.3, 132.2, 128.6 (2C), 128.5, 128.3 (2C), 119.2, 74.4, 67.5, 44.6, 25.5; HRMS (FAB) calcd for  $\text{C}_{13}\text{H}_{17}\text{O}_3$   $[\text{M}+\text{H}]^+$  221.1178, found 221.1182.

Enantiomeric excess was determined by chiral HPLC analysis: YMC CHIRAL Amylose-SA; hexane–*i*-PrOH 100:1; flow rate 0.3 mL/min;  $t_{\text{R}} = 46.6$  min (major enantiomer),  $t_{\text{R}} = 50.7$  min (minor enantiomer);  $\lambda = 215$  nm. Absolute configuration was assigned to be *R* from the sign of measured optical rotation: Lit<sup>14</sup> 95% ee (*S* isomer),  $[\alpha]_{\text{D}}^{28} +5.8$  (*c* 1.09, EtOH).

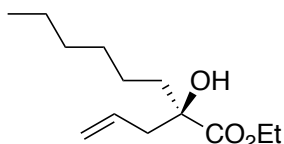

**Ethyl (*R*)-2-Allyl-2-hydroxyoctanoate (3c).** Colorless oil;  $[\alpha]_{\text{D}}^{25} -9.3$  (*c*

1.13,  $\text{CHCl}_3$ ) (74% ee); IR (film) 3524, 2957, 2928, 1730, 1557, 1223  $\text{cm}^{-1}$ ;  $^1\text{H}$  NMR (600 MHz,  $\text{CDCl}_3$ )  $\delta$  5.77 (m, 1H), 5.10 (m, 1H), 5.08 (m, 1H), 4.23 (dq,  $J = 2.4, 7.2$  Hz, 2H), 3.19 (s, 1H), 2.46 (q,  $J = 7.2$  Hz, 1H), 2.40 (ddt,  $J = 1.2, 7.2, 13.8$  Hz, 1H), 1.74 (ddd,  $J = 4.8, 12.0, 13.8$  Hz, 1H), 1.64 (ddd,  $J = 4.8, 12.0, 13.8$  Hz, 1H), 1.47 (m, 1H), 1.29 (t,  $J = 7.2$  Hz, 3H), 1.28–1.24 (m, 6H), 1.07 (m, 1H), 0.87 (t,  $J = 7.2$  Hz, 3H);  $^{13}\text{C}$  NMR (150 MHz,  $\text{CDCl}_3$ )  $\delta$  176.2, 132.5, 118.7, 77.2, 61.8, 43.9, 38.8, 31.6, 29.3, 23.4, 22.5, 14.3, 14.0; HRMS (ESI) calcd for  $\text{C}_{13}\text{H}_{24}\text{NaO}_3$   $[\text{M}+\text{Na}]^+$  251.16231, found 251.1619.

Enantiomeric excess was determined by chiral HPLC analysis after the transformation of **3c** into the corresponding 3,5-dinitrobenzoate: YMC CHIRAL Cellulose-SB; hexane–*i*-PrOH 9:1; flow rate 1.0 mL/min;  $t_{\text{R}} = 9.4$  min (major enantiomer), 26.6 min (minor enantiomer);  $\lambda = 254$  nm. Absolute configuration (*R*) was assigned by analogy with **3b**.

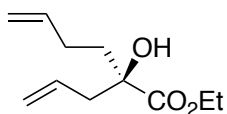

**Ethyl (*R*)-2-Allyl-2-hydroxyhex-5-enoate (3d).** Colorless oil;  $[\alpha]_{\text{D}}^{25} -9.4$  (*c*

0.53,  $\text{CHCl}_3$ ) (74% ee); IR (film) 3624, 3078, 2980, 1730, 1641, 1447, 1223  $\text{cm}^{-1}$ ;  $^1\text{H}$  NMR (400 MHz,  $\text{CDCl}_3$ )  $\delta$  5.83–5.71 (m, 2H), 5.12 (m, 1H), 5.08 (m, 1H), 5.01 (dq,  $J = 1.6, 17.2$  Hz, 1H),

4.94 (m, 1H), 4.23 (dq,  $J = 2.4, 7.2$  Hz, 2H), 3.24, (s, 1H), 2.50–2.39 (m, 2H), 2.23 (m, 1H), 1.90 (m, 1H), 1.86–1.73 (m, 2H), 2.30 (t,  $J = 7.2$  Hz, 3H);  $^{13}\text{C}$  NMR (150 MHz,  $\text{CDCl}_3$ )  $\delta$  175.9, 137.9, 132.3, 118.9, 114.8, 76.8, 61.8, 44.0, 37.9, 27.9, 14.3; HRMS (ESI) calcd for  $\text{C}_{11}\text{H}_{18}\text{NaO}_3$   $[\text{M}+\text{Na}]^+$  221.1154, found 221.1144.

Enantiomeric excess was determined by chiral HPLC analysis after the transformation of **3d** into the corresponding 3,5-dinitrobenzoate: YMC CHIRAL Cellulose-SB; hexane-*i*-PrOH 20:1; flow rate 1.0 mL/min;  $t_{\text{R}} = 23.3$  min (major enantiomer),  $t_{\text{R}} = 40.8$  min (minor enantiomer);  $\lambda = 254$  nm. Absolute configuration (*R*) was assigned by analogy with **3b**.

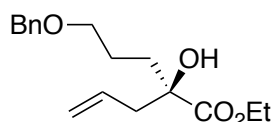

**Ethyl (*R*)-2-(3-(Benzyloxy)propyl)-2-hydroxypent-4-enoate (3e).**

Colorless oil;  $[\alpha]_{\text{D}}^{25} -11.5$  ( $c$  0.64,  $\text{CHCl}_3$ ) (73% ee); IR (film) 3524, 2932, 2859, 1728, 1225, 1098  $\text{cm}^{-1}$ ;  $^1\text{H}$  NMR (400 MHz,  $\text{CDCl}_3$ )  $\delta$  7.36–7.26 (m, 5H), 5.77 (m, 1H), 5.12–5.07 (m, 2H), 4.49 (s, 2H), 4.25–4.18 (m, 2H), 3.49–3.45 (m, 2H), 2.51–2.36 (m, 2H), 1.91 (m, 1H), 1.79–1.70 (m, 2H), 1.51 (m, 1H), 1.28 (t,  $J = 7.2$  Hz, 3H). A signals due to one proton (OH) was not observed;  $^{13}\text{C}$  NMR (100 MHz,  $\text{CDCl}_3$ )  $\delta$  175.9, 138.3, 132.4, 128.3 (2C), 127.5 (2C), 127.5, 118.8, 76.9, 72.7, 70.1, 61.8, 43.9, 35.6, 23.9, 14.3; HRMS (ESI) calcd for  $\text{C}_{17}\text{H}_{24}\text{NaO}_4$   $[\text{M}+\text{Na}]^+$  315.1572, found 315.1570.

Enantiomeric excess was determined by chiral HPLC analysis: YMC CHIRAL Amylose-SA; hexane-*i*-PrOH 100:1; flow rate 0.3 mL/min;  $t_{\text{R}} = 27.1$  min (major enantiomer),  $t_{\text{R}} = 29.4$  min (minor enantiomer),  $\lambda = 215$  nm. Absolute configuration (*R*) was assigned by analogy with **3b**.

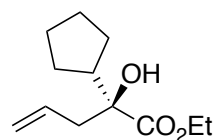

**Ethyl (*S*)-2-Cyclopentyl-2-hydroxypent-4-enoate (3f).**

Colorless oil;  $[\alpha]_{\text{D}}^{26} -22.7$  ( $c$  0.95,  $\text{CHCl}_3$ ) (69% ee); IR (film) 3524, 2957, 2870, 1726, 1223, 1179  $\text{cm}^{-1}$ ;  $^1\text{H}$  NMR (600 MHz,  $\text{CDCl}_3$ )  $\delta$  5.76 (m, 1H), 5.10–5.06 (m, 2H), 4.22 (q,  $J = 7.2$  Hz, 2H), 2.50–2.41 (m, 2H), 2.23 (m, 1H), 1.74–1.35 (m, 8H), 1.29 (t,  $J = 7.2$  Hz, 3H). A signals due to one proton (OH) was not observed;  $^{13}\text{C}$  NMR (150 MHz,  $\text{CDCl}_3$ )  $\delta$  176.4, 133.0, 118.4, 78.2, 61.7, 46.9, 42.7, 26.6, 26.0, 25.7, 25.6, 14.3; HRMS (ESI) calcd for  $\text{C}_{12}\text{H}_{20}\text{NaO}_3$   $[\text{M}+\text{Na}]^+$  235.1310, found 235.1315.

Enantiomeric excess was determined by chiral HPLC analysis after the transformation of **3f** into the

corresponding 3,5-dinitrobenzoate: YMC CHIRAL Cellulose-SB; hexane-*i*-PrOH 9:1; flow rate 1.0 mL/min;  $t_R = 10.5$  min (major enantiomer),  $t_R = 45.1$  min (minor enantiomer);  $\lambda = 254$  nm. Absolute configuration (*S*) was assigned by analogy with methyl (*R*)-2-cyclohexyl-2-hydroxypent-4-enoate {91% ee,  $[\alpha]^{25}_D +8.3$  (*c* 1.2, CHCl<sub>3</sub>)}.<sup>15</sup>

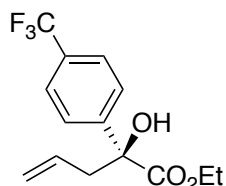

**Benzyl (*S*)-2-Hydroxy-2-(4-(trifluoromethyl)phenyl)pent-4-enoate (**3i**).**

Colorless oil;  $[\alpha]^{20}_D +16.1$  (*c* 1.30, CHCl<sub>3</sub>) (79% ee); IR (film) 3508, 1730, 1618, 1411, 1329, 1230, 1166, 1126, 1070 cm<sup>-1</sup>; <sup>1</sup>H NMR (400 MHz, CDCl<sub>3</sub>)  $\delta$  7.76 (d,  $J = 8.8$  Hz, 2H), 7.61 (d,  $J = 8.8$  Hz, 2H), 5.77 (dddd,  $J = 6.8, 7.6, 10.4, 17.2$  Hz, 1H), 5.21–5.13 (m, 2H), 4.29 (qd,  $J = 7.2, 10.8$  Hz, 1H), 4.21 (qd,  $J = 7.2, 10.8$  Hz, 1H), 3.84 (s, 1H), 2.96 (dd,  $J = 7.6, 14.0$  Hz, 1H), 2.74 (ddt,  $J = 1.2, 6.8, 14.0$  Hz, 1H), 1.28 (t,  $J = 7.2$  Hz, 3H); <sup>13</sup>C NMR (100 MHz, CDCl<sub>3</sub>)  $\delta$  174.0, 145.2, 131.7, 130.0 (q, <sup>2</sup> $J_{CF} = 32.3$  Hz), 126.2 (2C), 125.2 (q, <sup>3</sup> $J_{CF} = 3.8$  Hz, 2C), 124.1 (q, <sup>1</sup> $J_{CF} = 270.7$  Hz), 119.8, 77.7, 62.8, 44.3, 14.0; HRMS (ESI) calcd for C<sub>14</sub>H<sub>15</sub>F<sub>3</sub>O<sub>3</sub>Na [M+Na]<sup>+</sup> 311.0871, found 311.0870.

Enantiomeric excess was determined by chiral HPLC analysis: Daicel CHIRALPAK AD-H; hexane-*i*-PrOH 100:1; flow rate 0.3 mL/min;  $t_R = 27.5$  min (major enantiomer),  $t_R = 29.8$  min (minor enantiomer);  $\lambda = 254$  nm). Absolute configuration (*S*) was assigned by analogy with methyl (*S*)-2-hydroxy-2-phenylhex-5-enoate {95% ee,  $[\alpha]^{24}_D +78.5$  (*c* 1.0, CHCl<sub>3</sub>)}.<sup>16</sup>



### Typical Procedure of Nucleophilic Addition of Methallyltrimethylsilane with $\alpha$ -Keto Ester **2a** promoted by **1a**•Cu(NTf<sub>2</sub>)<sub>2</sub> (Table 3, entry 1).

Copper(II) trifluoromethanesulfonimide (6.2 mg, 0.010 mmol) and ligand **1a** (4.2 mg, 0.010 mmol) were combined in an argon atmosphere glove box. The sealed flask was then removed from the box and connected to a nitrogen balloon. Anhydrous EtNO<sub>2</sub> (1.0 mL) was added, whereupon a blue solution was formed within 5 minutes. The solution was stirred for 2 h at ambient temperature. After  $\alpha$ -keto ester **2a** (41.2 mg, 0.200 mmol) was added at ambient temperature, the solution was cooled to -30 °C. To this mixture was added methallyltrimethylsilane (0.10 mL, 0.60 mmol), and the resulting solution was stirred at -30 °C for 1 h, and then at ambient temperature for 2 h. The reaction was quenched by the addition of saturated aqueous NaHCO<sub>3</sub> (1 mL), extracted with Et<sub>2</sub>O (3 × 10 mL). The combined extracts were dried (MgSO<sub>4</sub>) and concentrated. The residue was dissolved in THF (2 mL). After the solution was cooled to 0 °C, tetrabutylammonium fluoride (1.0 M solution in THF, 0.20 mL, 0.20 mmol) was added to the mixture. After being stirred at 0 °C for 1 h, the reaction mixture was diluted with saturated aqueous NH<sub>4</sub>Cl (1 mL) and extracted with EtOAc (3 × 10 mL). The combined extracts were dried (MgSO<sub>4</sub>) and concentrated. The resultant residue was purified by column chromatography on silica gel using hexane–EtOAc (20:1) to give **4a** (90% yield, 96% ee) as a colorless oil. The enantiomeric excess (ee) was determined through chiral HPLC analysis.

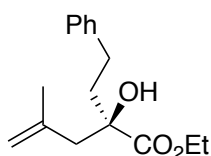

**Ethyl (*R*)-2-Hydroxy-4-methyl-2-phenethylpent-4-enoate (**4a**).** Colorless

oil;  $[\alpha]_D^{20}$  +19.7 (*c* 1.31, CHCl<sub>3</sub>) (96% ee); IR (film) 3520, 1728, 1454, 1373, 1253, 1207, 1114, 1060, 1020 cm<sup>-1</sup>; <sup>1</sup>H NMR (400 MHz, CDCl<sub>3</sub>)  $\delta$  7.65–7.29 (m, 2H), 7.20–7.16 (m, 3H), 4.88 (qd, *J* = 1.2, 1.6 Hz, 1H), 4.75 (qd, *J* = 0.8, 1.6 Hz, 1H), 4.21 (qd, *J* = 7.2, 10.8 Hz, 1H), 4.18 (qd, *J* = 7.2, 10.8 Hz, 1H), 3.35 (s, 1H), 2.83 (ddd, *J* = 5.2, 12.0, 13.6 Hz, 1H), 2.53 (d, *J* = 13.6 Hz, 1H), 2.420 (dd, *J* = 0.8, 13.6 Hz, 1H), 2.419 (ddd, *J* = 5.2, 12.0, 13.6 Hz, 1H), 2.10 (dddd, *J* = 0.8, 5.2, 12.0, 13.6 Hz, 1H), 1.99 (ddd, *J* = 5.2, 12.0, 13.6 Hz, 1H), 1.77 (dd, *J* = 0.8, 1.2 Hz, 3H), 1.31 (t, *J* = 7.2 Hz, 3H); <sup>13</sup>C NMR (100 MHz, CDCl<sub>3</sub>)  $\delta$  176.1, 141.6, 141.1, 128.40 (2C), 128.35 (2C), 125.9, 115.0, 77.3, 61.8, 47.3, 41.4, 30.0, 24.0, 14.2; HRMS (FAB) calcd for C<sub>16</sub>H<sub>23</sub>O<sub>3</sub> [M+H]<sup>+</sup> 263.1647, found 263.1660.

Enantiomeric excess was determined by chiral HPLC analysis: YMC CHIRAL Amylose-SA;

hexane-*i*-PrOH 100:1; flow rate 0.3 mL/min;  $t_R = 19.2$  min (major enantiomer),  $t_R = 18.4$  min (minor enantiomer),  $\lambda = 215$  nm. Absolute configuration (*R*) was assigned by analogy with **3b**.

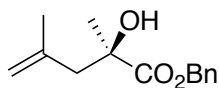

**Benzyl (*R*)-2-Hydroxy-2,4-dimethylpent-4-enoate (4b).** Colorless oil;

$[\alpha]_D^{20} +16.1$  ( $c$  1.03,  $\text{CHCl}_3$ ) (94% ee); IR (film) 3526, 1734, 1456, 1375, 1263, 1198, 1111  $\text{cm}^{-1}$ ;  $^1\text{H}$  NMR (400 MHz,  $\text{CDCl}_3$ )  $\delta$  7.41–7.30 (m, 5H), 5.21 (d,  $J = 12.0$  Hz, 1H), 5.13 (d,  $J = 12.0$  Hz, 1H), 4.85 (qd,  $J = 1.6, 2.4$  Hz, 1H), 4.70 (qd,  $J = 1.2, 2.4$  Hz, 1H), 3.14 (s, 1H), 2.54 (d,  $J = 14.0$  Hz, 1H), 2.38 (dd,  $J = 0.8, 14.0$  Hz, 1H), 1.72 (dd,  $J = 1.2, 1.6$  Hz, 3H), 1.45 (s, 3H);  $^{13}\text{C}$  NMR (100 MHz,  $\text{CDCl}_3$ )  $\delta$  176.6, 141.1, 135.2, 128.6, 128.6, 128.5, 128.3, 128.3, 115.1, 74.6, 67.5, 47.8, 26.4, 23.8; HRMS (FAB) calcd for  $\text{C}_{14}\text{H}_{19}\text{O}_3$   $[\text{M}+\text{H}]^+$  235.1334, found 235.1346.

Enantiomeric excess was determined by chiral HPLC analysis: YMC CHIRAL Amylose-SA; hexane-*i*-PrOH 100:1; flow rate 0.3 mL/min;  $t_R = 25.2$  min (major enantiomer),  $t_R = 23.5$  min (minor enantiomer),  $\lambda = 215$  nm. Absolute configuration (*R*) was assigned by analogy with **3b**.

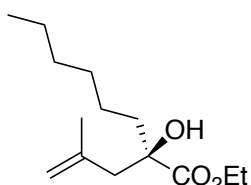

**Ethyl (*R*)-2-Hydroxy-2-(2-methylallyl)octanoate (4c).** Colorless oil;

$[\alpha]_D^{19} -11.0$  ( $c$  1.03,  $\text{CHCl}_3$ ) (94% ee); IR (film) 3528, 1730, 1456, 1205, 1139, 1097, 1022, 1070  $\text{cm}^{-1}$ ;  $^1\text{H}$  NMR (400 MHz,  $\text{CDCl}_3$ )  $\delta$  4.85 (qd,  $J = 2.0, 2.4$  Hz, 1H), 4.73 (qd,  $J = 0.8, 2.4$  Hz, 1H), 4.25 (qd,  $J = 7.2, 10.8$  Hz, 1H), 4.19 (qd,  $J = 7.2, 10.8$  Hz, 1H), 3.19 (s, 1H), 2.49 (d,  $J = 13.6$  Hz, 1H), 2.36 (d,  $J = 13.6$  Hz, 1H), 1.75 (m, 1H), 1.75 (s, 3H), 1.63 (ddd,  $J = 4.4, 12.0, 13.2$  Hz, 1H), 1.46 (m, 1H), 1.30 (t,  $J = 7.2$  Hz, 3H), 1.26–1.22 (m, 6H), 1.04 (m, 1H), 0.87 (t,  $J = 7.2$  Hz, 3H);  $^{13}\text{C}$  NMR (100 MHz,  $\text{CDCl}_3$ )  $\delta$  176.4, 141.4, 114.7, 77.5, 61.7, 47.2, 39.7, 31.6, 29.3, 24.0, 23.3, 22.5, 14.2, 14.0; HRMS (FAB)  $m/z$   $\text{C}_{14}\text{H}_{27}\text{O}_3$   $[\text{M}+\text{H}]^+$  243.1960, found 243.1962.

Enantiomeric excess was determined by chiral HPLC analysis: Daicel CHIRALPAK AD-H; hexane-*i*-PrOH 100:1; flow rate 0.3 mL/min;  $t_R = 13.8$  min (major enantiomer),  $t_R = 14.6$  min (minor enantiomer),  $\lambda = 215$  nm. Absolute configuration (*R*) was assigned by analogy with **3b**.

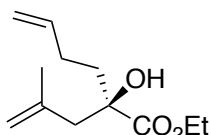

**Ethyl (*R*)-2-Hydroxy-2-(2-methylallyl)hex-5-enoate (4d).** Colorless oil;

$[\alpha]^{23}_D -98.6$  (*c* 2.09,  $\text{CHCl}_3$ ) (96% ee); IR (film) 3516, 3078, 2980, 1730, 1641, 1449, 1221  $\text{cm}^{-1}$ ;  $^1\text{H}$  NMR (600 MHz,  $\text{CDCl}_3$ )  $\delta$  5.77 (m, 1H), 4.99 (dq,  $J = 1.8, 17.4$  Hz, 1H), 4.93 (m, 1H), 4.86 (dt,  $J = 1.8, 4.2$  Hz, 1H), 4.73 (dt,  $J = 1.8, 4.2$  Hz, 1H), 4.27–4.17 (m, 2H), 3.24 (s, 1H), 2.50 (dd,  $J = 1.2, 13.2$  Hz, 1H), 2.38 (dd,  $J = 1.2, 13.2$  Hz, 1H), 2.22 (m, 1H), 1.92–1.84 (m, 2H), 1.75 (m, 1H), 1.75 (dd,  $J = 1.2, 1.2$  Hz, 3H), 1.31 (t,  $J = 7.2$  Hz, 3H);  $^{13}\text{C}$  NMR (150 MHz,  $\text{CDCl}_3$ )  $\delta$  176.1, 141.2, 137.9, 114.8, 114.8, 77.2, 61.7, 47.2, 38.7, 27.9, 24.0, 14.2; HRMS (ESI) calcd for  $\text{C}_{12}\text{H}_{20}\text{NaO}_3$   $[\text{M}+\text{Na}]^+$  235.1310, found 235.1311.

Enantiomeric excess was determined by chiral HPLC analysis: YMC CHIRAL Amylose-SA; hexane–EtOH 200:1; flow rate 0.5 mL/min;  $t_R = 10.9$  min (major enantiomer),  $t_R = 11.6$  min (minor enantiomer);  $\lambda = 215$  nm). Absolute configuration (*R*) was assigned by analogy with **3b**.

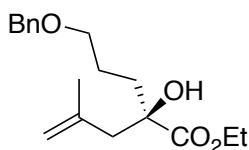

**Ethyl (*R*)-2-(3-(Benzyloxy)propyl)-2-hydroxy-4-methylpent-4-enoate (4e).**

Colorless oil;  $[\alpha]^{25}_D -9.55$  (*c* 0.77,  $\text{CHCl}_3$ ) (98% ee); IR (film) 3518, 2959, 2926, 2857, 1728, 1454, 1209, 1099  $\text{cm}^{-1}$ ;  $^1\text{H}$  NMR (400 MHz,  $\text{CDCl}_3$ )  $\delta$  7.35–7.32 (m, 4H), 7.28 (m, 1H), 4.86 (m, 1H), 4.73 (m, 1H), 4.50 (s, 2H), 4.25–4.17 (m, 2H), 3.49–3.45 (m, 2H), 3.37 (s, 1H), 2.51 (d,  $J = 13.8$  Hz, 1H), 2.38 (d,  $J = 13.8$  Hz, 1H), 1.90 (ddd,  $J = 4.8, 10.2, 13.2$  Hz, 1H), 1.79 (m, 1H), 1.75 (s, 3H), 1.72 (ddd,  $J = 4.8, 10.2, 13.2$  Hz, 1H), 1.47 (m, 1H), 1.29 (t,  $J = 7.2$  Hz, 3H);  $^{13}\text{C}$  NMR (100 MHz,  $\text{CDCl}_3$ )  $\delta$  176.1, 141.3, 138.4, 128.3 (2C), 127.5 (2C), 127.5, 114.8, 77.3, 72.7, 70.1, 61.7, 47.1, 36.5, 24.0, 23.9, 14.2; HRMS (ESI) calcd for  $\text{C}_{18}\text{H}_{26}\text{NaO}_4$   $[\text{M}+\text{Na}]^+$  329.1723, found 329.1721.

Enantiomeric excess was determined by chiral HPLC analysis: YMC CHIRAL Amylose-SA; hexane–*i*-PrOH 9:1; flow rate 0.3 mL/min;  $t_R = 22.3$  min (major enantiomer),  $t_R = 24.2$  min (minor enantiomer),  $\lambda = 254$  nm. Absolute configuration (*R*) was assigned by analogy with **3b**.

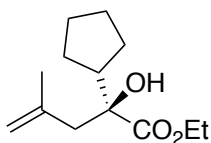

**Ethyl (*S*)-2-Cyclopentyl-2-hydroxy-4-methylpent-4-enoate (4f).** Colorless

oil;  $[\alpha]^{26}_D -20.3$  (*c* 0.46,  $\text{CHCl}_3$ ) (88% ee); IR (film) 3522, 2955, 2870, 1726, 1204  $\text{cm}^{-1}$ ;  $^1\text{H}$  NMR

(400 MHz, CDCl<sub>3</sub>)  $\delta$  4.82 (m, 1H), 4.71 (m, 1H), 4.26–4.16 (m, 2H), 3.14 (s, 1H), 2.46 (dd,  $J$  = 9.6, 14.0 Hz, 2H), 2.24 (quin,  $J$  = 8.4 Hz, 1H), 1.75 (s, 3H), 1.73–1.36 (m, 8H), 1.30 (t,  $J$  = 7.2 Hz, 3H); <sup>13</sup>C NMR (100 MHz, CDCl<sub>3</sub>)  $\delta$  176.6, 141.9, 114.2, 78.6, 61.6, 47.7, 45.7, 26.6, 26.1, 25.7, 25.7, 24.0, 14.2; HRMS (ESI) calcd for C<sub>13</sub>H<sub>22</sub>NaO<sub>3</sub> [M+Na]<sup>+</sup> 249.1467, found 249.1461.

Enantiomeric excess was determined by chiral HPLC analysis after the transformation of **4f** into the corresponding 3,5-dinitrobenzoate: YMC CHIRAL Amylose-SA; hexane–*i*-PrOH 9:1; flow rate 0.3 mL/min;  $t_R$  = 18.1 min (major enantiomer),  $t_R$  = 17.0 min (minor enantiomer),  $\lambda$  = 254 nm. Absolute configuration (*S*) was assigned by analogy with methyl (*R*)-2-cyclohexyl-2-hydroxypent-4-enoate {91% ee,  $[\alpha]^{25}_D$  +8.3 (*c* 1.2, CHCl<sub>3</sub>)}.<sup>15</sup>

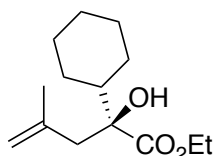

**Ethyl (*S*)-2-Cyclohexyl-2-hydroxy-4-methylpent-4-enoate (**4g**).** Colorless

oil;  $[\alpha]^{20}_D$  –14.1 (*c* 0.86, CHCl<sub>3</sub>) (78% ee); IR (film) 3524, 1726, 1449, 1265, 1236, 1204, 1152, 1111 cm<sup>–1</sup>; <sup>1</sup>H NMR (400 MHz, CDCl<sub>3</sub>)  $\delta$  4.82 (qd,  $J$  = 1.6, 2.0 Hz, 1H), 4.71 (qd,  $J$  = 0.8, 2.0 Hz, 1H), 4.23 (qd,  $J$  = 7.2, 10.8 Hz, 1H), 4.18 (qd,  $J$  = 7.2, 10.8 Hz, 1H), 3.13 (s, 1H), 2.50 (d,  $J$  = 13.2 Hz, 1H), 2.40 (d,  $J$  = 13.2 Hz, 1H), 1.90–1.60 (m, 5H), 1.74 (s, 3H), 1.40–1.05 (m, 6H), 1.30 (t,  $J$  = 7.2 Hz, 3H); <sup>13</sup>C NMR (100 MHz, CDCl<sub>3</sub>)  $\delta$  176.4, 142.1, 114.3, 80.2, 61.6, 45.9, 44.1, 27.4, 26.3 (2C), 26.2, 25.8, 24.1, 14.2; HRMS (FAB) calcd for C<sub>14</sub>H<sub>25</sub>O<sub>3</sub> [M+H]<sup>+</sup> 241.1804, found 241.1819.

Enantiomeric excess was determined by chiral HPLC analysis: YMC CHIRAL Amylose-SA; hexane–*i*-PrOH 100:1; flow rate 0.3 mL/min;  $t_R$  = 16.0 min (major enantiomer),  $t_R$  = 17.1 min (minor enantiomer),  $\lambda$  = 215 nm. Absolute configuration (*S*) was assigned by analogy with methyl (*R*)-2-cyclohexyl-2-hydroxypent-4-enoate {91% ee,  $[\alpha]^{25}_D$  +8.3 (*c* 1.2, CHCl<sub>3</sub>)}.<sup>15</sup>

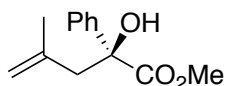

**Methyl (*S*)-2-Hydroxy-4-methyl-2-phenylpent-4-enoate (**4h**).** Colorless

oil;  $[\alpha]^{20}_D$  +24.2 (*c* 1.25, CHCl<sub>3</sub>) (98% ee); IR (film) 3509, 1732, 1449, 1437, 1246, 1213, 1119 cm<sup>–1</sup>; <sup>1</sup>H NMR (400 MHz, CDCl<sub>3</sub>)  $\delta$  7.64–7.61 (m, 2H), 7.38–7.33 (m, 2H), 7.29 (m, 1H), 4.90 (qd,  $J$  = 1.6, 2.0 Hz, 1H), 4.79 (qd,  $J$  = 1.2, 2.0 Hz, 1H), 3.77 (s, 3H), 3.72 (s, 1H), 3.05 (d,  $J$  = 14.0 Hz, 1H), 2.70 (dd,  $J$  = 0.8, 14.0 Hz, 1H), 1.73 (d,  $J$  = 0.8 Hz, 3H); <sup>13</sup>C NMR (100 MHz, CDCl<sub>3</sub>)  $\delta$  175.3, 141.8, 141.1, 128.2 (2C), 127.8, 125.5 (2C), 115.3, 78.2, 53.1, 47.2, 24.0; HRMS (FAB) calcd for C<sub>13</sub>H<sub>17</sub>O<sub>3</sub> [M+H]<sup>+</sup> 221.1178, found 221.1169.

Enantiomeric excess was determined by chiral HPLC analysis: YMC CHIRAL Amylose-SA; hexane-*i*-PrOH 100:1; flow rate 0.3 mL/min;  $t_R = 22.9$  min (major enantiomer),  $t_R = 25.0$  min (minor enantiomer),  $\lambda = 200$  nm. Absolute configuration (*S*) was assigned by analogy with methyl (*S*)-2-hydroxy-2-phenylhex-5-enoate {95% ee,  $[\alpha]^{24}_D +78.5$  (*c* 1.0, CHCl<sub>3</sub>)}.<sup>16</sup>

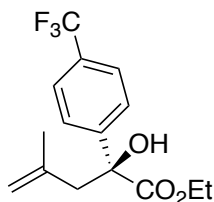

**Ethyl (*S*)-2-Hydroxy-4-methyl-2-(4-(trifluoromethyl)phenyl)pent-4-enoate**

**(4i).** Colorless oil;  $[\alpha]^{21}_D +16.1$  (*c* 0.64, CHCl<sub>3</sub>) (97% ee); IR (film) 3501, 1728, 1618, 1412, 1329, 1260, 1211, 1167, 1128, 1101, 1071 cm<sup>-1</sup>; <sup>1</sup>H NMR (300 MHz, CDCl<sub>3</sub>)  $\delta$  7.78 (d,  $J = 8.4$  Hz, 2H), 7.61 (d,  $J = 8.4$  Hz, 2H), 4.90 (m, 1H), 4.79 (m, 1H), 4.27 (qd,  $J = 7.2, 10.8$  Hz, 1H), 4.22 (qd,  $J = 7.2, 10.8$  Hz, 1H), 3.85 (s, 1H), 3.02 (d,  $J = 13.8$ , 1H), 2.68 (d,  $J = 13.8$  Hz, 1H), 1.74 (s, 3H), 1.29 (t,  $J = 7.2$  Hz, 3H); <sup>13</sup>C NMR (100 MHz, CDCl<sub>3</sub>)  $\delta$  174.2, 145.8, 140.6, 129.9 (q,  $^2J_{CF} = 32.3$  Hz), 126.2 (2C), 125.1 (q,  $^3J_{CF} = 3.8$  Hz, 2C), 124.1 (q,  $^1J_{CF} = 270.5$  Hz), 115.7, 78.0, 62.8, 47.4, 24.1, 14.0; HRMS (FAB) calcd for C<sub>15</sub>H<sub>18</sub>F<sub>3</sub>O<sub>3</sub> [M+H]<sup>+</sup> 303.1208, found 303.1216.

Enantiomeric excess was determined by chiral HPLC analysis: Daicel CHIRALPAK AD-H; hexane-*i*-PrOH 9:1; flow rate 0.3 mL/min;  $t_R = 17.6$  min (major enantiomer),  $t_R = 16.8$  min (minor enantiomer),  $\lambda = 254$  nm. Absolute configuration (*S*) was assigned by analogy with methyl (*S*)-2-hydroxy-2-phenylhex-5-enoate {95% ee,  $[\alpha]^{24}_D +78.5$  (*c* 1.0, CHCl<sub>3</sub>)}.<sup>16</sup>

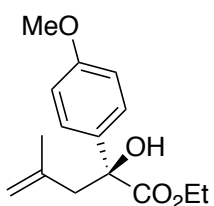

**Ethyl (*S*)-2-Hydroxy-2-(4-methoxyphenyl)-4-methylpent-4-enoate (4j).**

Colorless oil;  $[\alpha]^{21}_D +22.7$  (*c* 1.62, CHCl<sub>3</sub>) (93% ee); IR (film) 3501, 1724, 1609, 1510, 1456, 1300, 1250, 1207, 1179, 1099, 1034 cm<sup>-1</sup>; <sup>1</sup>H NMR (300 MHz, CDCl<sub>3</sub>)  $\delta$  7.54 (d,  $J = 9.0$  Hz, 2H), 6.87 (d,  $J = 9.0$  Hz, 2H), 4.89 (m, 1H), 4.80 (m, 1H), 4.24 (qd,  $J = 6.9, 10.5$  Hz, 1H), 4.19 (qd,  $J = 6.9, 10.5$  Hz, 1H), 3.80 (s, 3H), 3.73 (s, 1H), 3.01 (d,  $J = 13.8$  Hz, 1H), 2.67 (d,  $J = 13.8$  Hz, 1H), 1.74 (s, 3H), 1.27 (t,  $J = 6.9$  Hz, 3H); <sup>13</sup>C NMR (100 MHz, CDCl<sub>3</sub>)  $\delta$  175.0, 159.1, 141.3, 134.2, 126.8 (2C), 115.1, 113.4 (2C), 77.7, 62.3, 55.2, 47.2, 24.1, 14.0; HRMS (ESI) calcd for C<sub>15</sub>H<sub>20</sub>NaO<sub>4</sub> [M+Na]<sup>+</sup> 287.1259, found 287.1252.

Enantiomeric excess was determined by chiral HPLC analysis: Daicel CHIRALPAK AD-H;

hexane-*i*-PrOH 9:1; flow rate 0.3 mL/min;  $t_R = 33.6$  min (major enantiomer),  $t_R = 36.1$  min (minor enantiomer),  $\lambda = 254$  nm. Absolute configuration (*S*) was assigned by analogy with methyl (*S*)-2-hydroxy-2-phenylhex-5-enoate {95% ee,  $[\alpha]^{24}_D +78.5$  (*c* 1.0, CHCl<sub>3</sub>)}.<sup>16</sup>

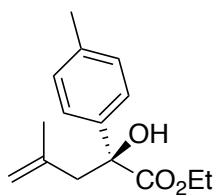

**Ethyl (*S*)-2-Hydroxy-4-methyl-2-(*p*-tolyl)pent-4-enoate (4k).** Colorless oil;

$[\alpha]^{25}_D +17.8$  (*c* 1.34, CHCl<sub>3</sub>) (96% ee); IR (film) 3503, 2982, 2922, 1724, 1207 cm<sup>-1</sup>; <sup>1</sup>H NMR (400 MHz, CDCl<sub>3</sub>)  $\delta$  7.51 (d, *J* = 8.4 Hz, 2H), 7.16 (d, *J* = 8.4 Hz, 2H), 4.89 (m, 1H), 4.80 (m, 1H), 4.26–4.17 (m, 2H), 3.73 (s, 1H), 3.02 (d, *J* = 14 Hz, 1H), 2.68 (d, *J* = 14 Hz, 1H), 2.34 (s, 3H), 1.74 (s, 3H), 1.28 (t, *J* = 7.2 Hz, 3H); <sup>13</sup>C NMR (100 MHz, CDCl<sub>3</sub>)  $\delta$  175.0, 141.3, 139.1, 137.3, 128.8 (2C), 125.4 (2C), 115.1, 77.9, 62.3, 47.2, 24.1, 21.0, 14.0; HRMS (ESI) calcd for C<sub>15</sub>H<sub>20</sub>NaO<sub>3</sub> [M+Na]<sup>+</sup> 271.1310, found 271.1306. Enantiomeric excess was determined by chiral HPLC analysis: Daicel CHIRALPAK AD-H; hexane- *i*-PrOH 100:1; flow rate 0.5 mL/min;  $t_R = 36.2$  min (major enantiomer),  $t_R = 31.5$  min (minor enantiomer),  $\lambda = 215$  nm. Absolute configuration (*S*) was assigned by analogy with methyl (*R*)-2-hydroxy-2-(*p*-tolyl)pent-4-enoate {91% ee,  $[\alpha]^{28}_D -16.1$  (*c* 0.38, CH<sub>2</sub>Cl<sub>2</sub>)}.<sup>8</sup>

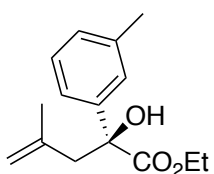

**Ethyl (*S*)-2-Hydroxy-4-methyl-2-(*m*-tolyl)pent-4-enoate (4l).** Colorless oil;

$[\alpha]^{25}_D +14.6$  (*c* 1.03, CHCl<sub>3</sub>) (95% ee); IR (film) 3505, 3077, 2980, 2924, 1724, 1447, 1209 cm<sup>-1</sup>; <sup>1</sup>H NMR (400 MHz, CDCl<sub>3</sub>)  $\delta$  7.46 (s, 1H), 7.42 (dd, *J* = 0.4, 8.0 Hz, 1H), 7.24 (t, *J* = 8.0 Hz, 1H), 7.10 (m, 1H), 4.90 (m, 1H), 4.81 (m, 1H), 4.22 (tq, *J* = 6.0, 16.2 Hz, 2H), 3.73 (s, 1H), 3.04 (d, *J* = 14.0 Hz, 1H), 2.68 (d, *J* = 14.0 Hz, 1H), 2.36 (s, 3H), 1.75 (s, 3H), 1.28 (t, *J* = 7.2 Hz, 3H); <sup>13</sup>C NMR (100 MHz, CDCl<sub>3</sub>)  $\delta$  174.9, 142.0, 141.3, 137.8, 128.4, 128.0, 126.1, 122.6, 115.1, 78.0, 62.3, 47.2, 24.1, 21.6, 14.0; HRMS (ESI) calcd for C<sub>15</sub>H<sub>20</sub>NaO<sub>3</sub> [M+Na]<sup>+</sup> 271.1310, found 271.1301. Enantiomeric excess was determined by chiral HPLC analysis: YMC CHIRAL Amylose-SA; hexane-EtOH 100:1; flow rate 0.3 mL/min;  $t_R = 16.0$  min (major enantiomer),  $t_R = 17.0$  min (minor enantiomer),  $\lambda = 220$  nm. Absolute configuration (*S*) was assigned by analogy with methyl (*R*)-2-hydroxy-2-(*m*-tolyl)pent-4-enoate {90% ee,  $[\alpha]^{28}_D -15.2$  (*c* 0.39, CH<sub>2</sub>Cl<sub>2</sub>)}.<sup>17</sup>

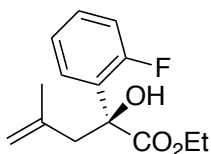

**Ethyl (S)-2-(2-Fluorophenyl)-2-hydroxy-4-methylpent-4-enoate (4n).**

Colorless oil;  $[\alpha]_D^{22} +10.3$  (*c* 0.86, CHCl<sub>3</sub>) (97% ee); IR (film) 3509, 1734, 1487, 1456, 1373, 1256, 1229, 1209, 1095, 1022 cm<sup>-1</sup>; <sup>1</sup>H NMR (400 MHz, CDCl<sub>3</sub>)  $\delta$  7.58 (dd, *J* = 1.2, 8.0 Hz, 1H), 7.15 (m, 1H), 7.15 (dd, *J* = 1.2, 8.0 Hz, 1H), 7.03 (dd, *J* = 1.2, 8.0 Hz, 1H), 4.90 (m, 1H), 4.79 (m, 1H), 4.22 (q, *J* = 7.2 Hz, 2H), 3.80 (s, 1H), 3.03 (d, *J* = 13.2 Hz, 1H), 2.96 (d, *J* = 13.2 Hz, 1H), 1.75 (dd, *J* = 1.2, 0.8 Hz, 3H), 1.24 (t, *J* = 7.2 Hz, 3H); <sup>13</sup>C NMR (100 MHz, CDCl<sub>3</sub>)  $\delta$  174.2, 160.2 (d, <sup>1</sup>*J*<sub>CF</sub> = 246.9 Hz), 140.9, 129.8 (d, <sup>3</sup>*J*<sub>CF</sub> = 8.7 Hz), 129.3 (d, <sup>3</sup>*J*<sub>CF</sub> = 12.0 Hz), 127.5 (d, <sup>2</sup>*J*<sub>CF</sub> = 3.8 Hz), 123.9 (d, <sup>4</sup>*J*<sub>CF</sub> = 3.4 Hz), 116.1 (d, <sup>2</sup>*J*<sub>CF</sub> = 23.0 Hz), 115.7, 76.2, 62.3, 44.5, 24.1, 13.9; HRMS (FAB) calcd for C<sub>14</sub>H<sub>18</sub>FO<sub>3</sub> [M+H]<sup>+</sup> 253.1240, found 253.1255.

Enantiomeric excess was determined by chiral HPLC analysis: YMC CHIRAL Amylose-SA; hexane-*i*-PrOH 100:1; flow rate 0.3 mL/min; *t*<sub>R</sub> = 26.3 min (major enantiomer), *t*<sub>R</sub> = 29.2 min (minor enantiomer),  $\lambda$  = 260 nm. Absolute configuration (*S*) was assigned by analogy with methyl (*S*)-2-hydroxy-2-phenylhex-5-enoate {95% ee,  $[\alpha]_D^{24} +78.5$  (*c* 1.0, CHCl<sub>3</sub>)}.<sup>16</sup>

### Examination of Solvents in the $1\mathbf{a}\cdot\text{Cu}(\text{NTf}_2)_2$ -catalyzed Addition of $2\mathbf{a}$ with Allyltrimethylsilane

| Solvent                  | Conditions  | Results           |
|--------------------------|-------------|-------------------|
| $\text{CH}_2\text{Cl}_2$ | 40 °C, 22 h | 0% yield          |
| THF                      | 50 °C, 5 h  | 0% yield          |
| $\text{CH}_3\text{CN}$   | 50 °C, 5 h  | 0% yield          |
| <i>i</i> -PrOH           | 50 °C, 5 h  | 0% yield          |
| $\text{EtNO}_2$          | rt, 21 h    | 78% yield, 74% ee |

The reaction of  $2\mathbf{a}$  (0.2 mmol) with allyltrimethylsilane (3 equiv) was conducted in the presence of  $1\mathbf{a}\cdot\text{Cu}(\text{NTf}_2)_2$  (5 mol%) under the indicated conditions. The crude product was treated with TBAF (1 equiv) in THF at 0 °C for 0.5 h.



## Catalytic Activities of Chiral Copper(II) Complexes in the Enantioselective Addition of **2a** with Methallyltrimethylsilane

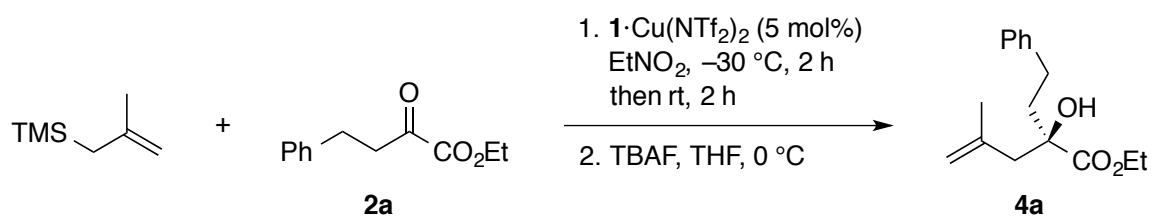

| Ligand ( <b>1</b> ) | Yield (%) | Ee (%) |
|---------------------|-----------|--------|
| <b>1a</b>           | 90        | 96     |
| <b>1b</b>           | 75        | 74     |
| <b>1c</b>           | 71        | -71    |
| <b>1d</b>           | 62        | -35    |
| <b>1e</b>           | 68        | 52     |
| <b>1f</b>           | 84        | 66     |

The reaction of **2a** (0.2 mmol) with methallyltrimethylsilane (3 equiv) was conducted in the presence of **1**·Cu(NTf<sub>2</sub>)<sub>2</sub> (5 mol%) in EtNO<sub>2</sub> at -30 °C for 2 h, then at ambient temperature for 2 h. The crude product was treated with TBAF (1 equiv) in THF at 0 °C for 0.5 h.

## Transformation of 3d and 4d

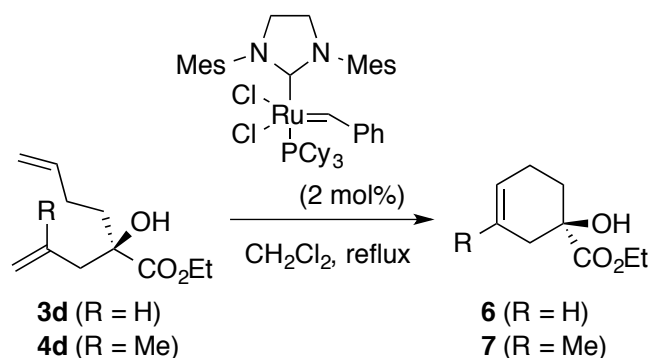

Grubbs 2<sup>nd</sup> generation (1.0 mg, 1.1  $\mu\text{mol}$ , 2 mol%) was placed in an oven-dried two-necked flask. Adduct **4d** (12 mg, 0.056 mmol) in  $\text{CH}_2\text{Cl}_2$  (2.0 mL) was added to the above-mentioned flask. After being stirred at 35  $^\circ\text{C}$  for 3h, the reaction mixture was concentrated. The residual oil was purified by column chromatography on silica gel (3 g, hexane–EtOAc 15 : 1) to give cyclohexene **9** (8.7 mg, 84%) as a yellow oil.

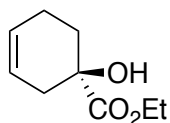

**Ethyl (*R*)-1-Hydroxycyclohex-3-ene-1-carboxylate (6).** Colorless oil;  $[\alpha]^{24}_{\text{D}}$

$-29.3$  ( $c$  0.30,  $\text{CHCl}_3$ ) (75% ee); IR (film) 3503, 2978, 2930, 1728, 1437, 1221, 1098  $\text{cm}^{-1}$ ;  $^1\text{H}$  NMR (400 MHz,  $\text{CDCl}_3$ )  $\delta$  5.76 (m, 1H), 5.61 (m, 1H), 4.21 (q,  $J = 7.2$  Hz, 2H), 3.10 (s, 1H), 2.57 (m, 1H), 2.28 (m, 1H), 2.10–2.05 (m, 2H), 1.91 (m, 1H), 1.74 (m, 1H), 1.27 (t,  $J = 7.2$  Hz, 3H);  $^{13}\text{C}$  NMR (100 MHz,  $\text{CDCl}_3$ )  $\delta$  176.8, 126.3, 122.8, 72.1, 61.8, 34.9, 30.6, 21.3, 14.1; HRMS (ESI) calcd for  $\text{C}_9\text{H}_{14}\text{NaO}_3$   $[\text{M}+\text{Na}]^+$  193.0841, found 193.0833.

Enantiomeric excess was determined by chiral HPLC analysis after the transformation of **6** into the corresponding 3,5-dinitrobenzoate: Daicel CHIRALPAK AD-H; hexane–*i*-PrOH 20:1; flow rate 1.0 mL/min;  $t_{\text{R}} = 22.1$  min (major enantiomer),  $t_{\text{R}} = 20.8$  min (minor enantiomer);  $\lambda = 254$  nm. Absolute configuration (*R*) was assigned by analogy with methyl (*S*)-1-hydroxycyclohex-3-ene-1-carboxylate {92% ee,  $[\alpha]^{20.9}_{\text{D}} +32.7$  ( $c$  0.660,  $\text{CH}_2\text{Cl}_2$ )}.<sup>18</sup>

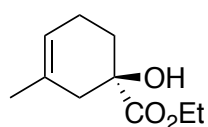

**Ethyl (*R*)-1-Hydroxy-3-methylcyclohex-3-ene-1-carboxylate (7).** Yellow oil;

$[\alpha]^{20}_{\text{D}} -36.5$  ( $c$  1.17,  $\text{CHCl}_3$ ) (95% ee); IR (film) 3495, 2967, 2928, 1728, 1447, 1246, 1099  $\text{cm}^{-1}$ ;

$^1\text{H}$  NMR (600 MHz,  $\text{CDCl}_3$ )  $\delta$  5.49 (m, 1H), 4.24 (q,  $J = 7.2$  Hz, 2H), 3.05 (s, 1H), 2.53 (m, 1H), 2.27 (m, 1H), 2.06 (m, 1H), 1.95 (m, 1H), 1.84 (m, 1H), 1.71 (m, 1H), 1.68 (s, 3H), 1.29 (t,  $J = 7.2$  Hz, 3H);  $^{13}\text{C}$  NMR (150 MHz,  $\text{CDCl}_3$ )  $\delta$  176.9, 130.0, 120.1, 72.8, 61.8, 39.5, 30.5, 23.6, 21.4, 14.1; HRMS (ESI) calcd for  $\text{C}_{10}\text{H}_{16}\text{NaO}_3$   $[\text{M}+\text{Na}]^+$  207.0997, found 207.0987.

Enantiomeric excess was determined by chiral HPLC analysis: YMC CHIRAL Cellulose-SB; hexane-*i*-PrOH 9:1; flow rate 0.3 mL/min;  $t_{\text{R}} = 17.0$  min (major enantiomer),  $t_{\text{R}} = 15.8$  min (minor enantiomer);  $\lambda = 215$  nm. Absolute configuration (*R*) was assigned by analogy with methyl (*S*)-1-hydroxycyclohex-3-ene-1-carboxylate {92% ee,  $[\alpha]_{\text{D}}^{20.9} +32.7$  ( $c$  0.660,  $\text{CH}_2\text{Cl}_2$ )}.<sup>18</sup>

### Proposed Mechanism of Generation of Silyl Ether 3

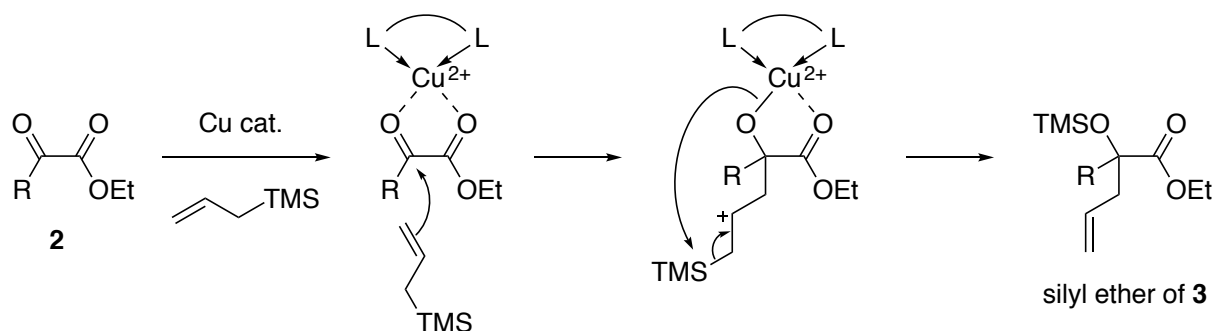

## References

- (1) K. Murase, K. Nitta, T. Hirato, Y. Awakura, *J. Appl. Electrochem.*, 2001, **31**, 1089.
- (2) A. Sakakura, R. Kondo, Y. Matsumura, M. Akakura, K. Ishihara, *J. Am. Chem. Soc.*, 2009, **131**, 17762.
- (3) J. Mao, F. Liu, M. Wang, L. Wu, B. Zheng, S. Liu, J. Zhong, *J. Am. Chem. Soc.*, 2014, **136**, 17662.
- (4) G. Desimoni, G. Faita, M. Mella, *Tetrahedron*, 1996, **52**, 13649.
- (5) Z.-W. Mei, T. Omote, M. Mansour, H. Kawafuchi, Y. Takaguchi, A. Jutand, S. Tsuboi, T. Inokuchi, *Tetrahedron*, 2008, **64**, 10761.
- (6) Y. Fan, Y. Jiang, D. An, D. Sha, J. Antilla, S. Zhang, *Org. Lett.*, 2014, **16**, 6112.
- (7) V. Roznyatovskiy, V. Lynch, L. Sessler, *Org. Lett.*, 2010, **12**, 4424.
- (8) J. A. Macritchie, A. Silcock, C. L. Willis, *Tetrahedron: Asymmetry*, 1997, **8**, 3895.
- (9) M. A. de las Heras, J. J. Vaquero, J. L. García-Navio, J. Alvarez-Builla, *J. Org. Chem.*, 1996, **61**, 9009.
- (10) M. Hayashi, S. Nakamura, *Angew. Chem. Int. Ed.*, 2011, **50**, 2249.
- (11) A. Metz, C. Kozlowski, *J. Org. Chem.*, 2013, **78**, 717.
- (12) R. Infante, X. Tang, J. Xi, W. Xu, J. Gong, *Angew Chem. Int. Ed.*, 2013, **52**, 14021.
- (13) A. Pena, D. Monge, E. Martin, E. Alvarez, *J. Am. Chem. Soc.*, 2012, **134**, 12912.
- (14) K. Yamada, T. Tozawa, M. Nishida, T. Mukaiyama, *Bull. Chem. Soc. Jpn.*, 1997, **70**, 2301.
- (15) D. W. Robbins, K. Lee, D. L. Silverio, A. Volkov, S. Torker, A. H. Hoveyda, *Angew. Chem. Int. Ed.*, 2016, **55**, 9610.
- (16) T. Ooi, K. Fukumoto, K. Maruoka, *Angew. Chem. Int. Ed.*, 2006, **45**, 3839.
- (17) K. Zeng, B. Qin, X. Liu, X. Feng, *J. Org. Chem.*, 2007, **72**, 8478.
- (18) M. Seto, J. L. Roizen, B. M. Stoltz, *Angew. Chem. Int. Ed.*, 2008, **47**, 6873.

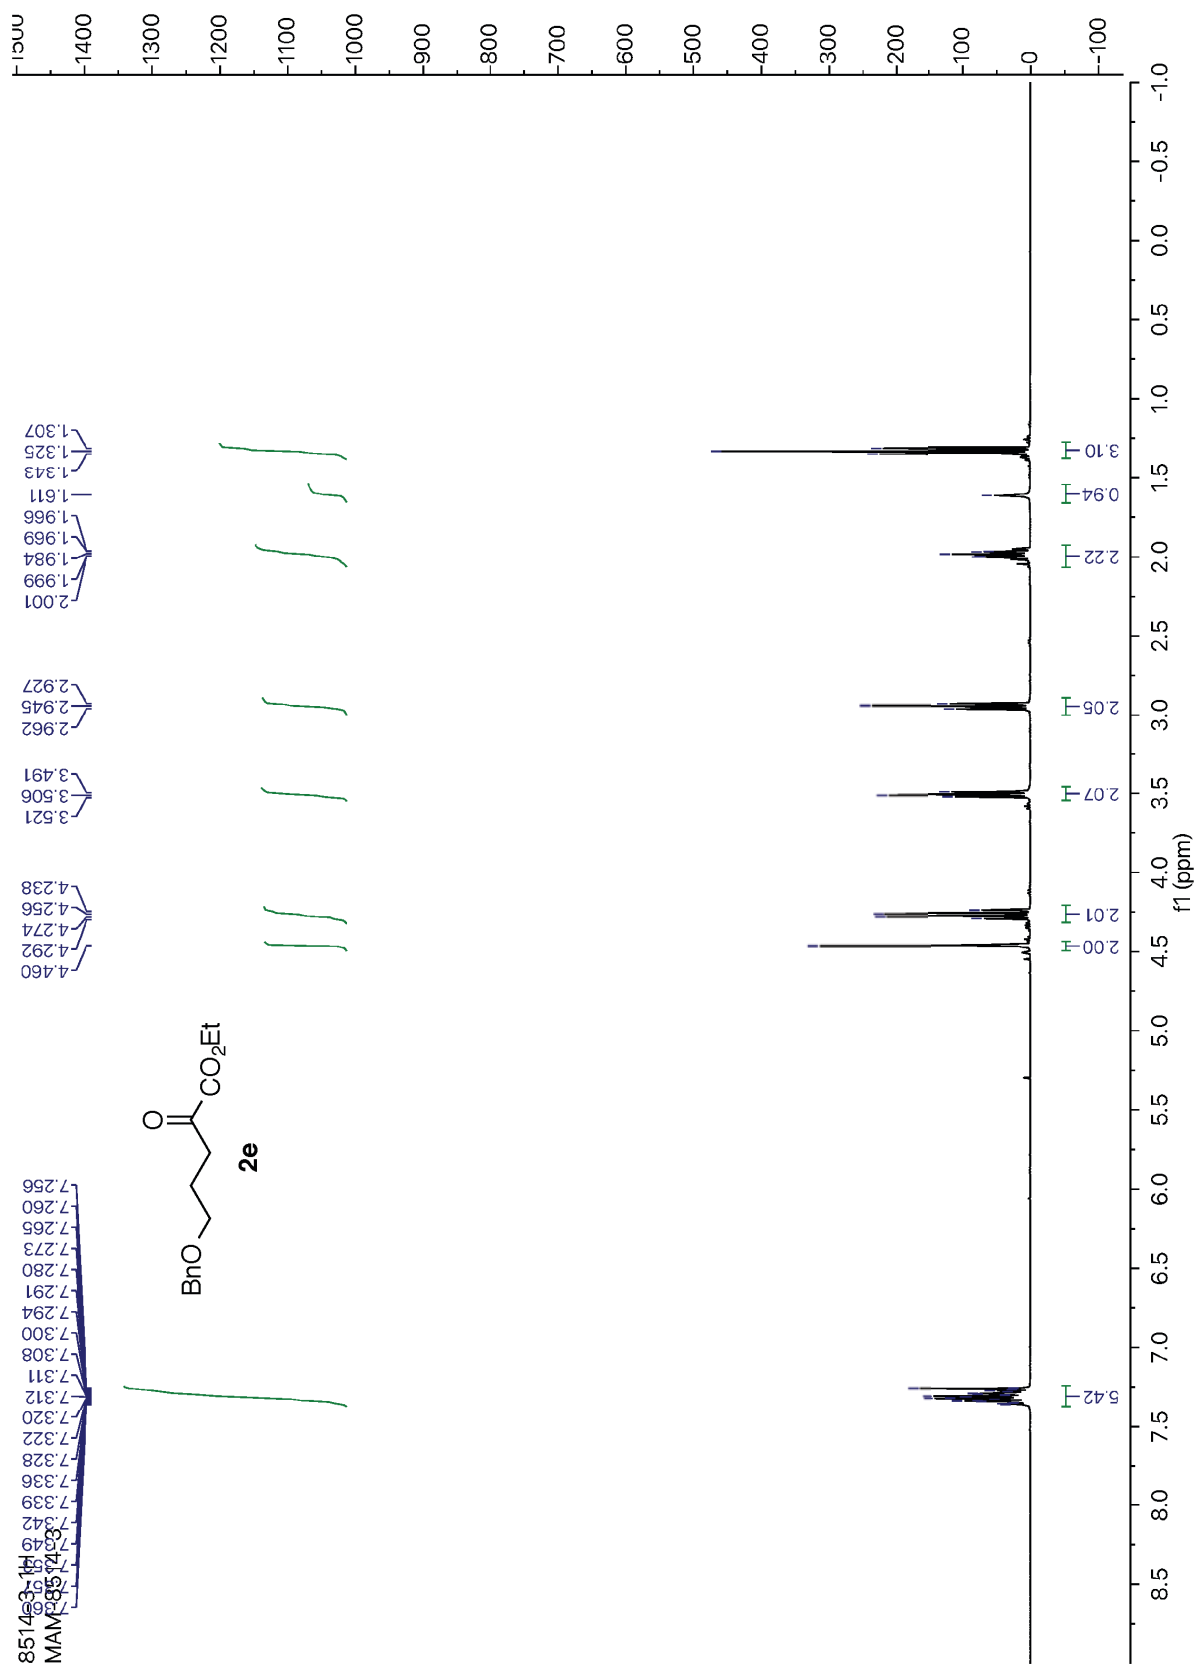

<sup>1</sup>H NMR spectra of compound **2e** (400 MHz, CDCl<sub>3</sub>)

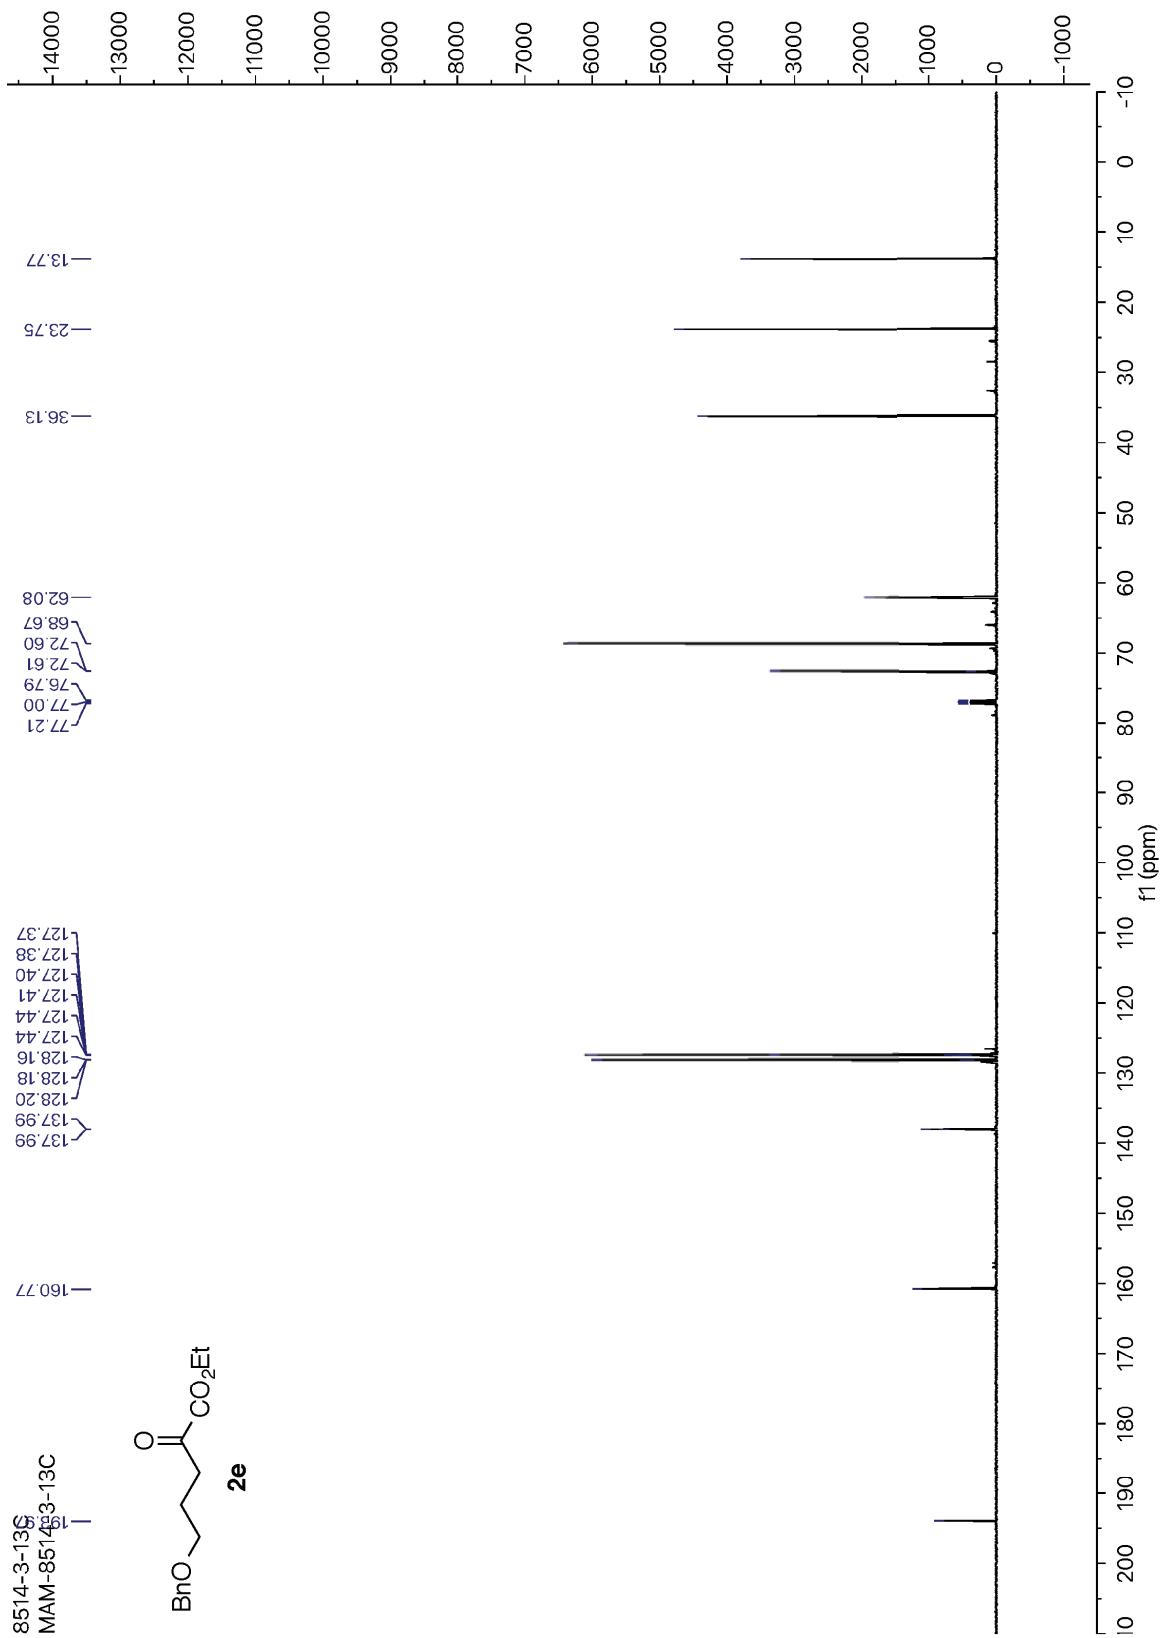

$^{13}\text{C}$  NMR spectra of compound **2e** (150 MHz,  $\text{CDCl}_3$ )

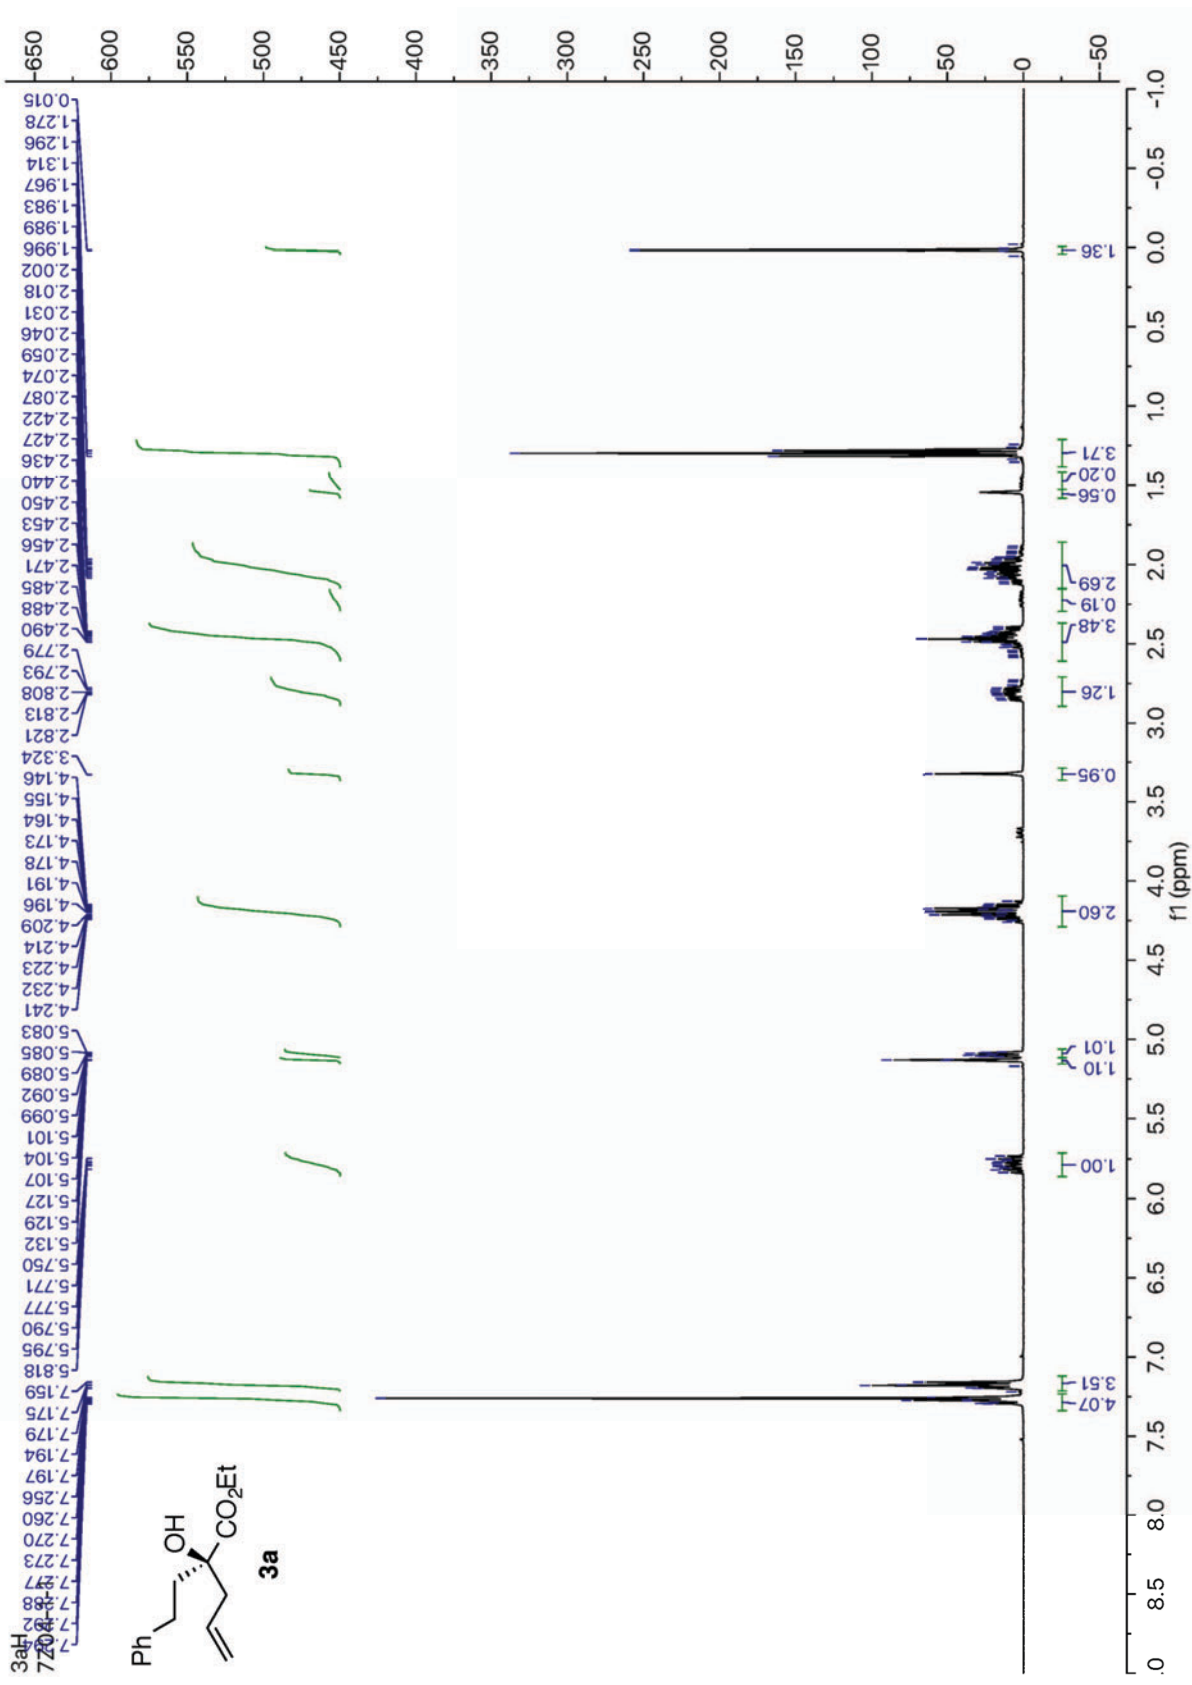

<sup>1</sup>H NMR spectra of compound **3a** (400 MHz, CDCl<sub>3</sub>)

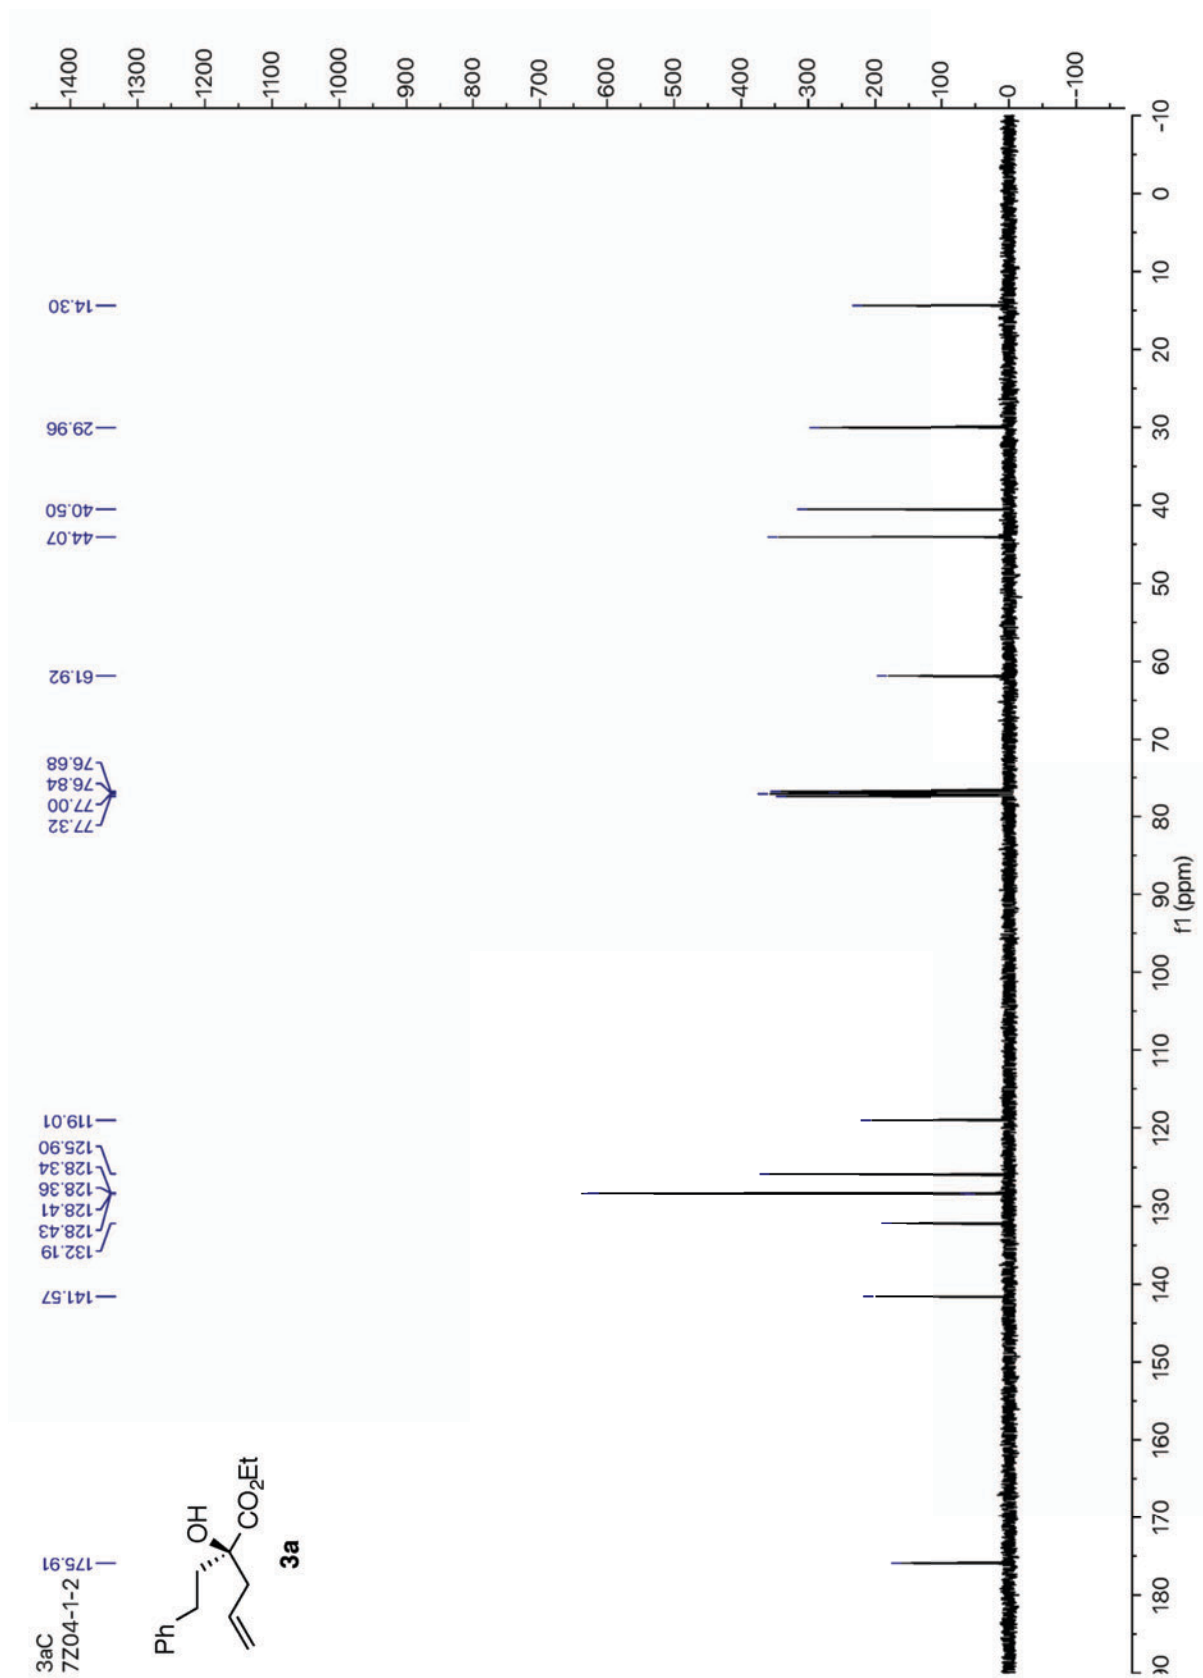

<sup>13</sup>C NMR spectra of compound **3a** (100 MHz, CDCl<sub>3</sub>)



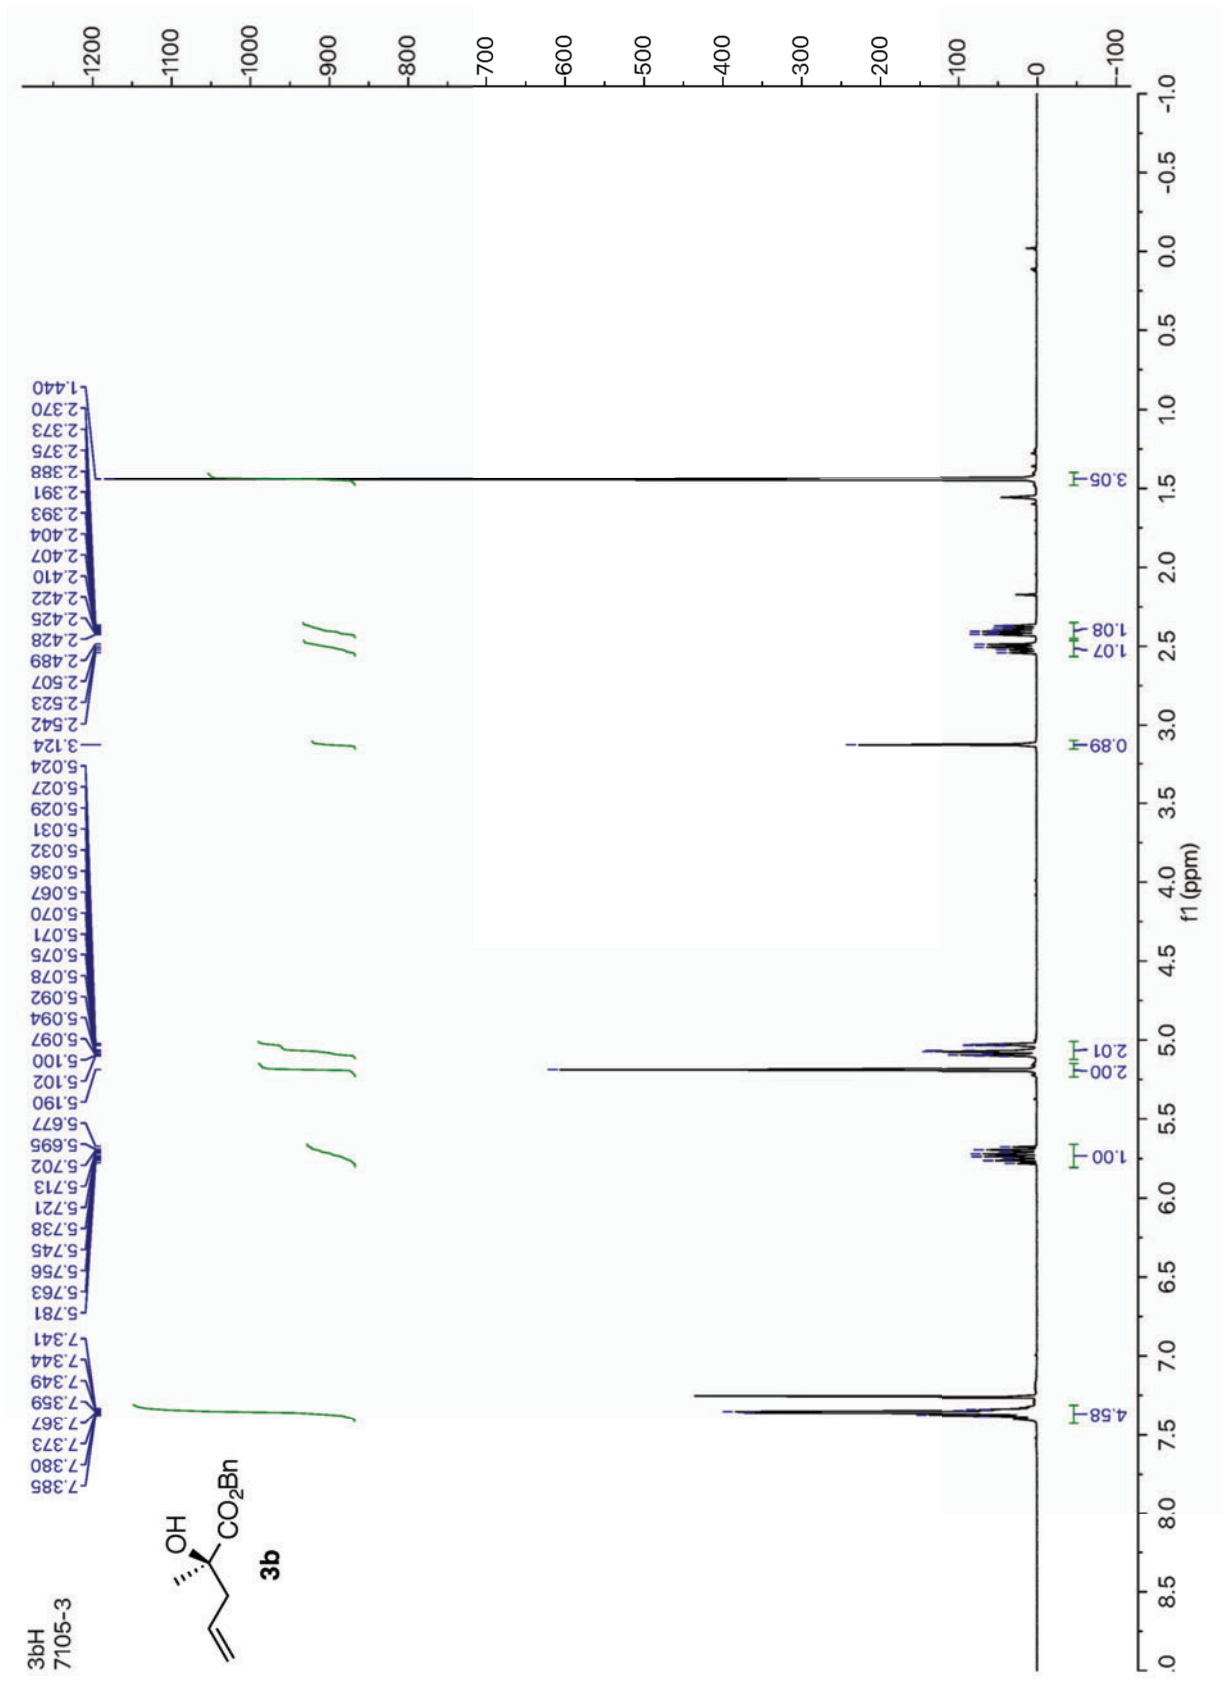

<sup>1</sup>H NMR spectra of compound **3b** (400 MHz, CDCl<sub>3</sub>)

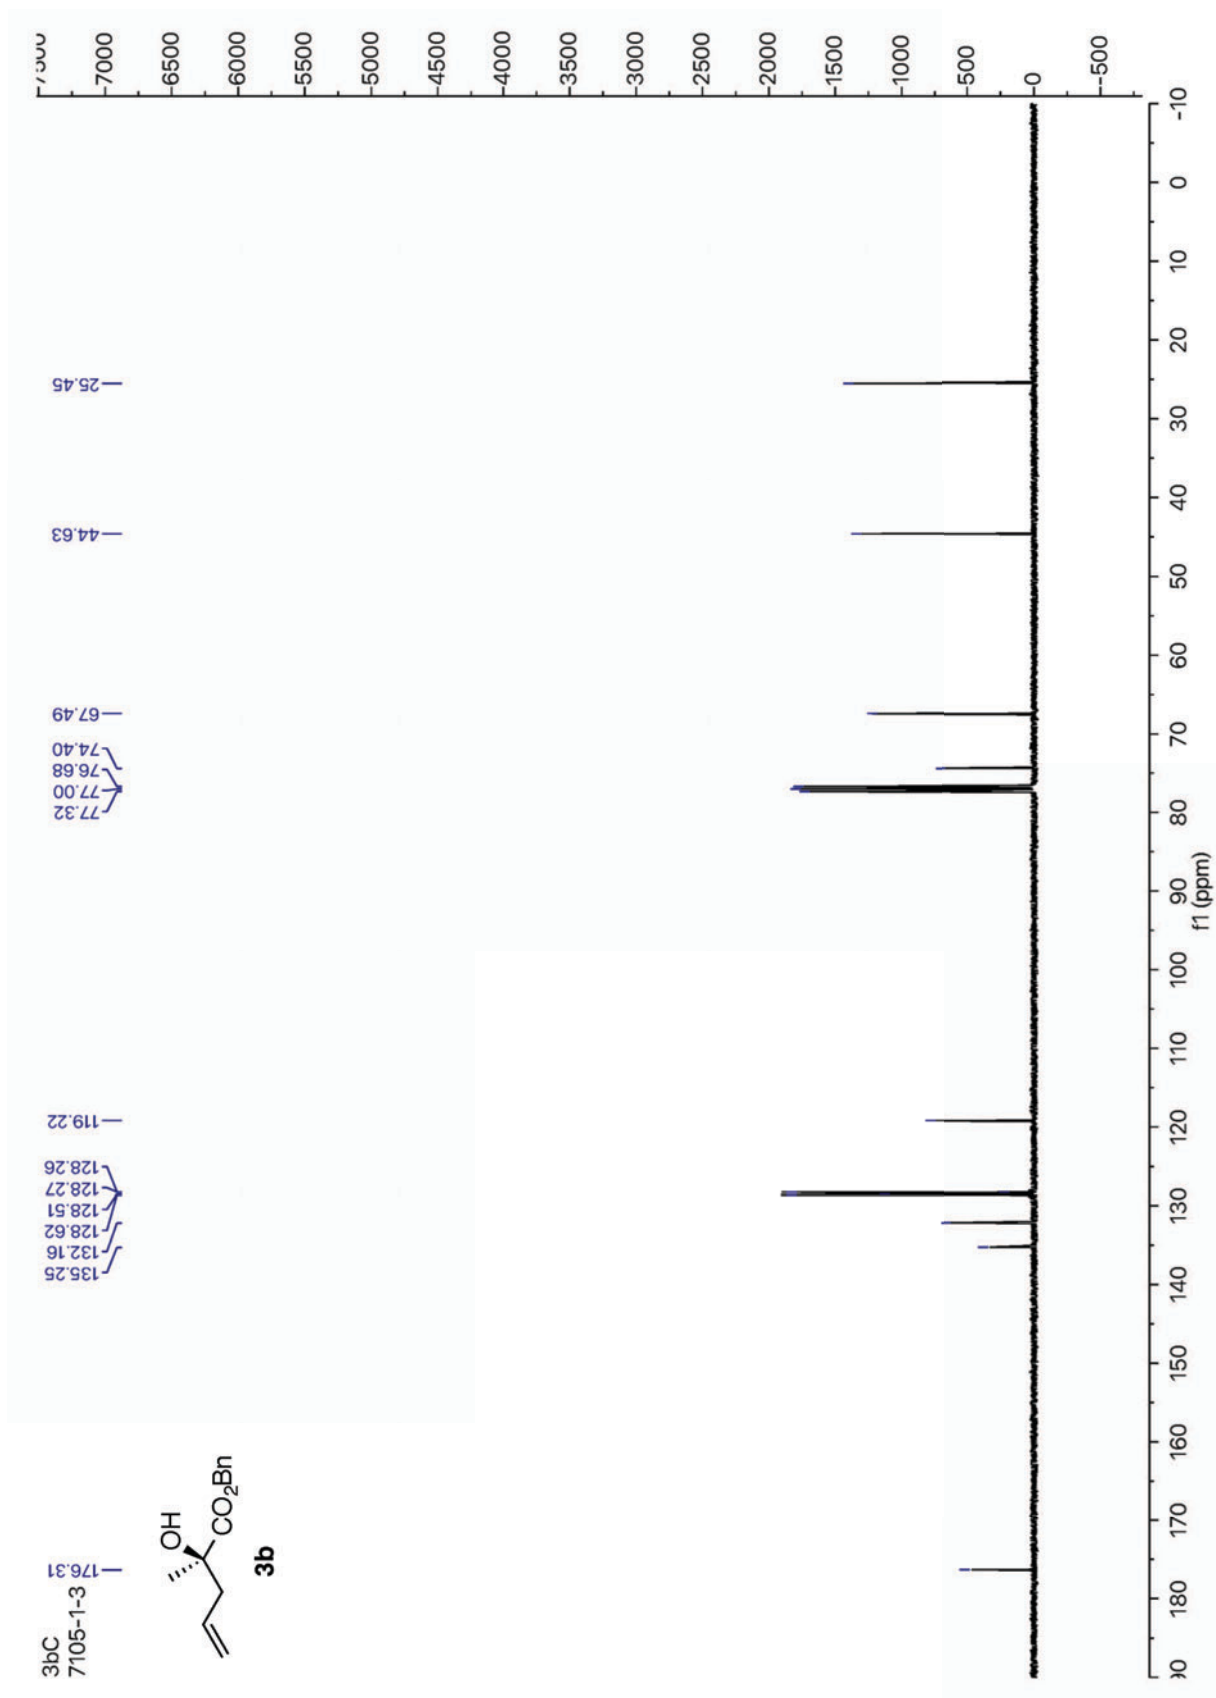

<sup>13</sup>C NMR spectra of compound **3b** (100 MHz, CDCl<sub>3</sub>)

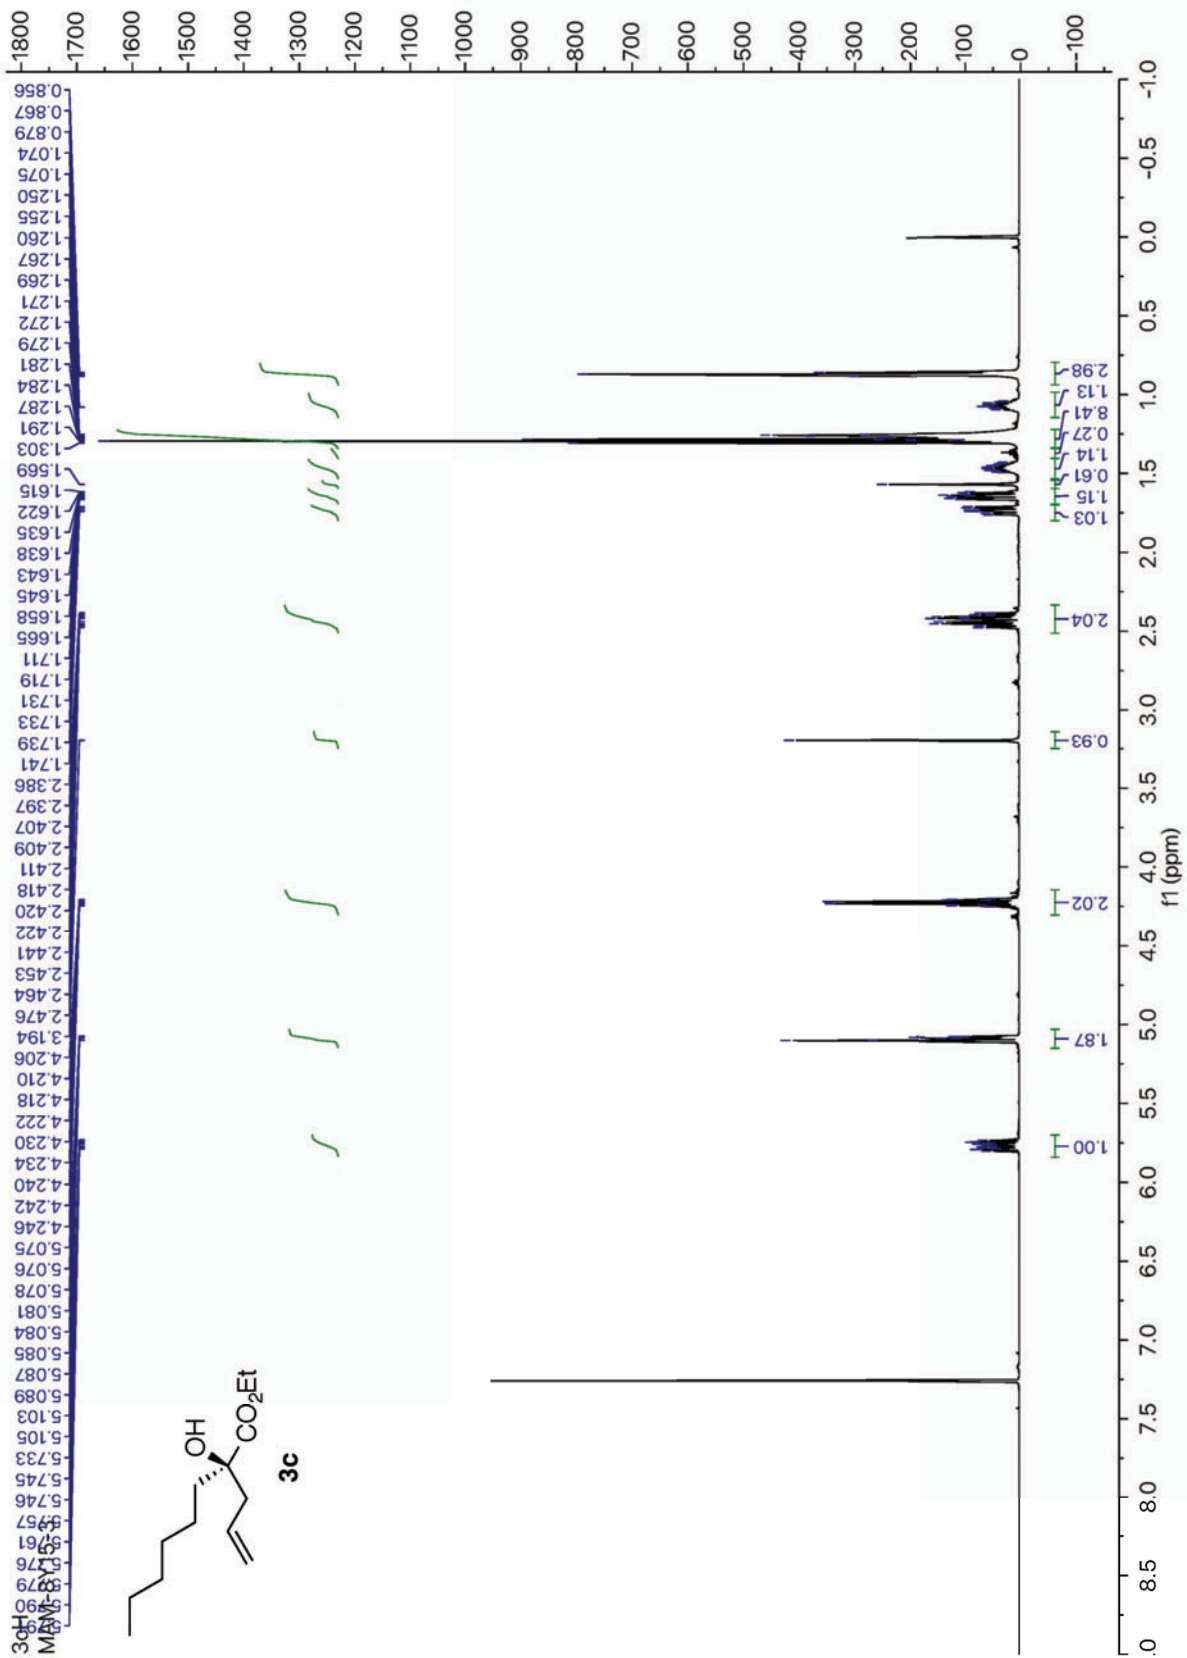

<sup>1</sup>H NMR spectra of compound **3c** (600 MHz, CDCl<sub>3</sub>)

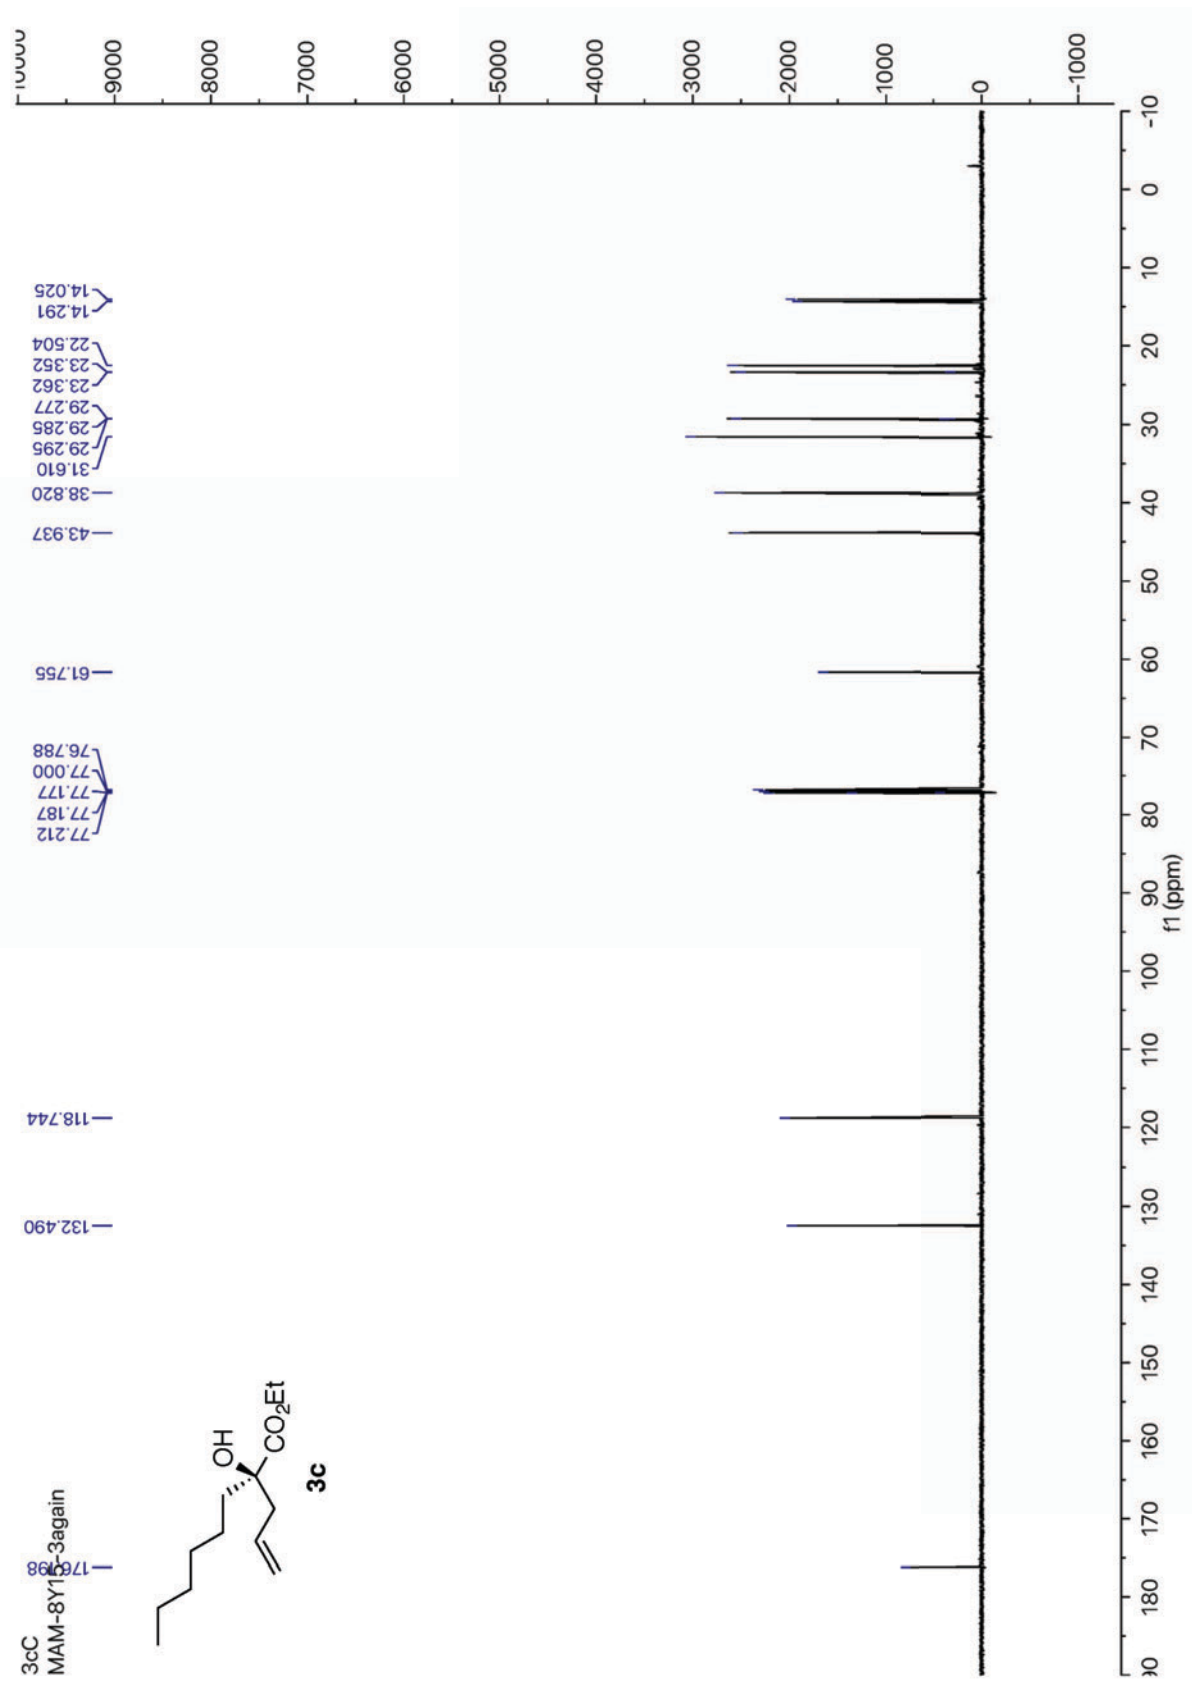

<sup>13</sup>C NMR spectra of compound **3c** (150 MHz, CDCl<sub>3</sub>)

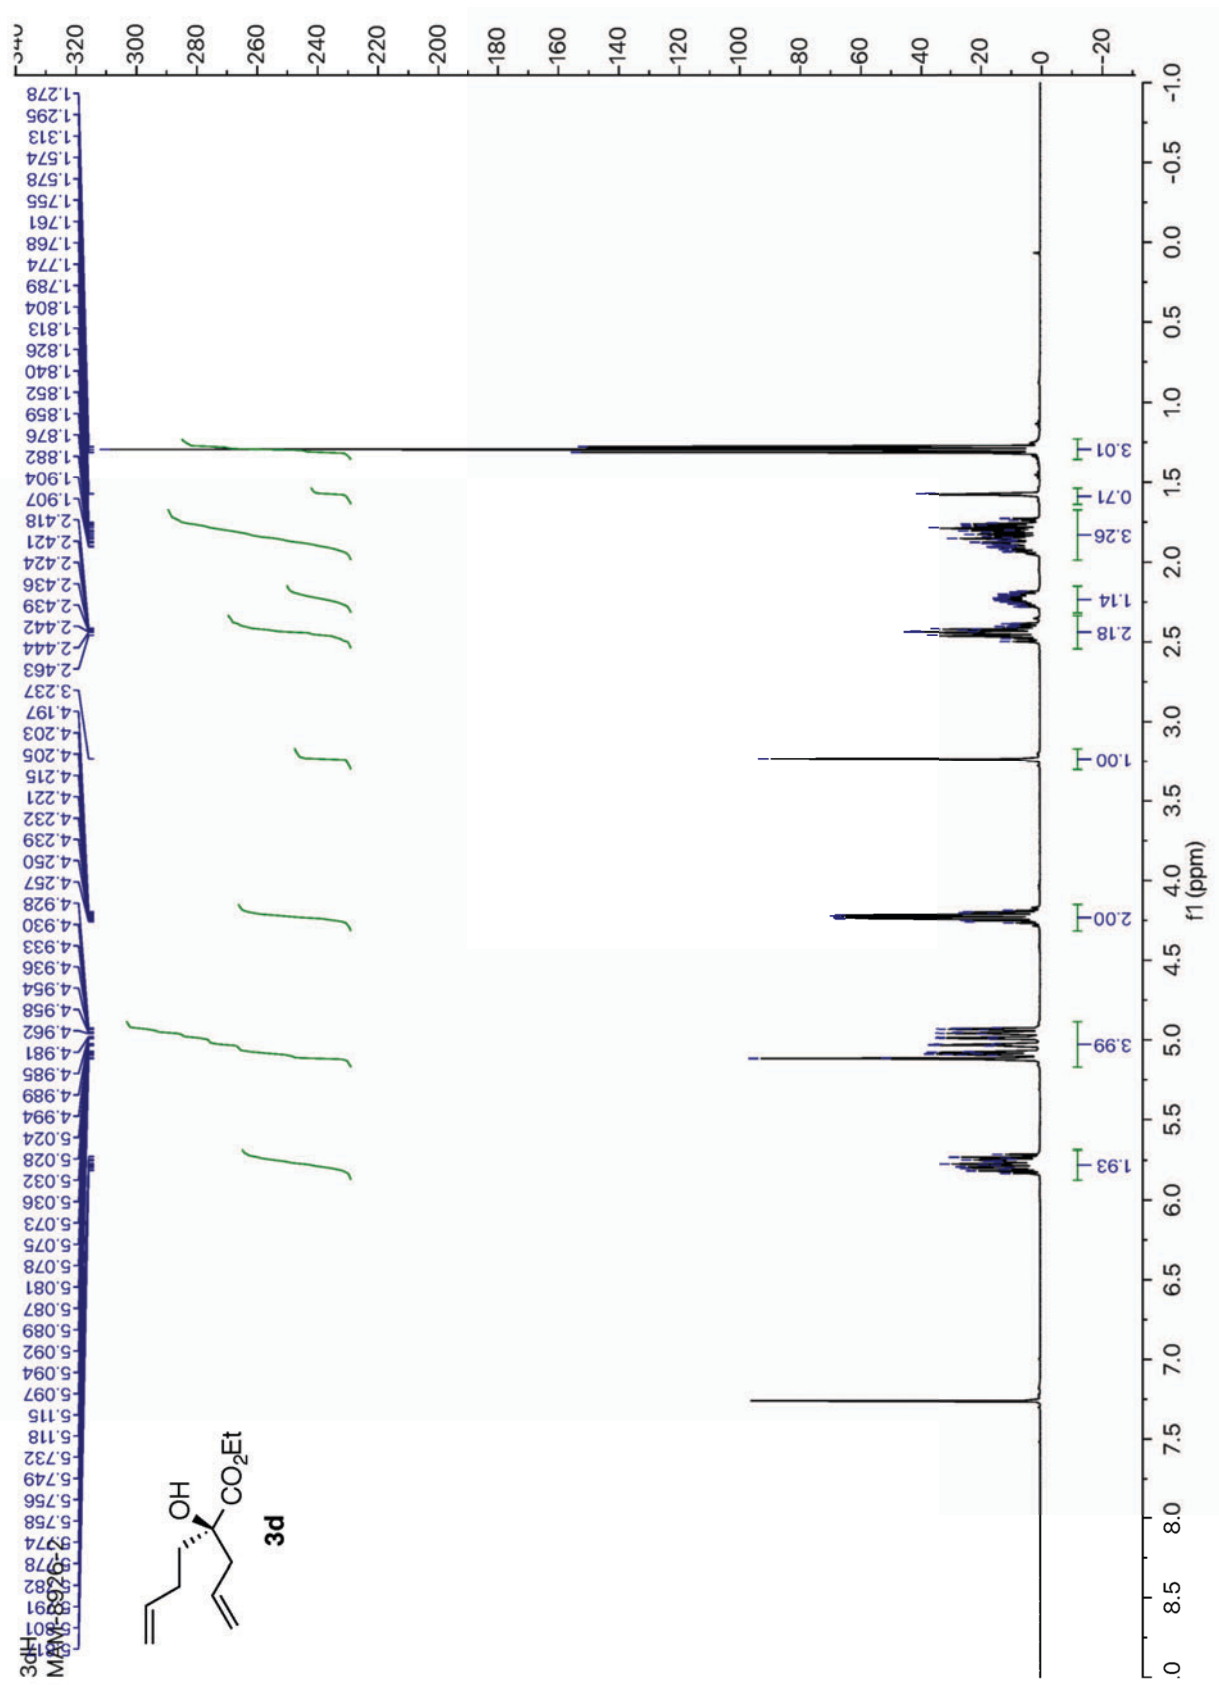

<sup>1</sup>H NMR spectra of compound **3d** (400 MHz, CDCl<sub>3</sub>)

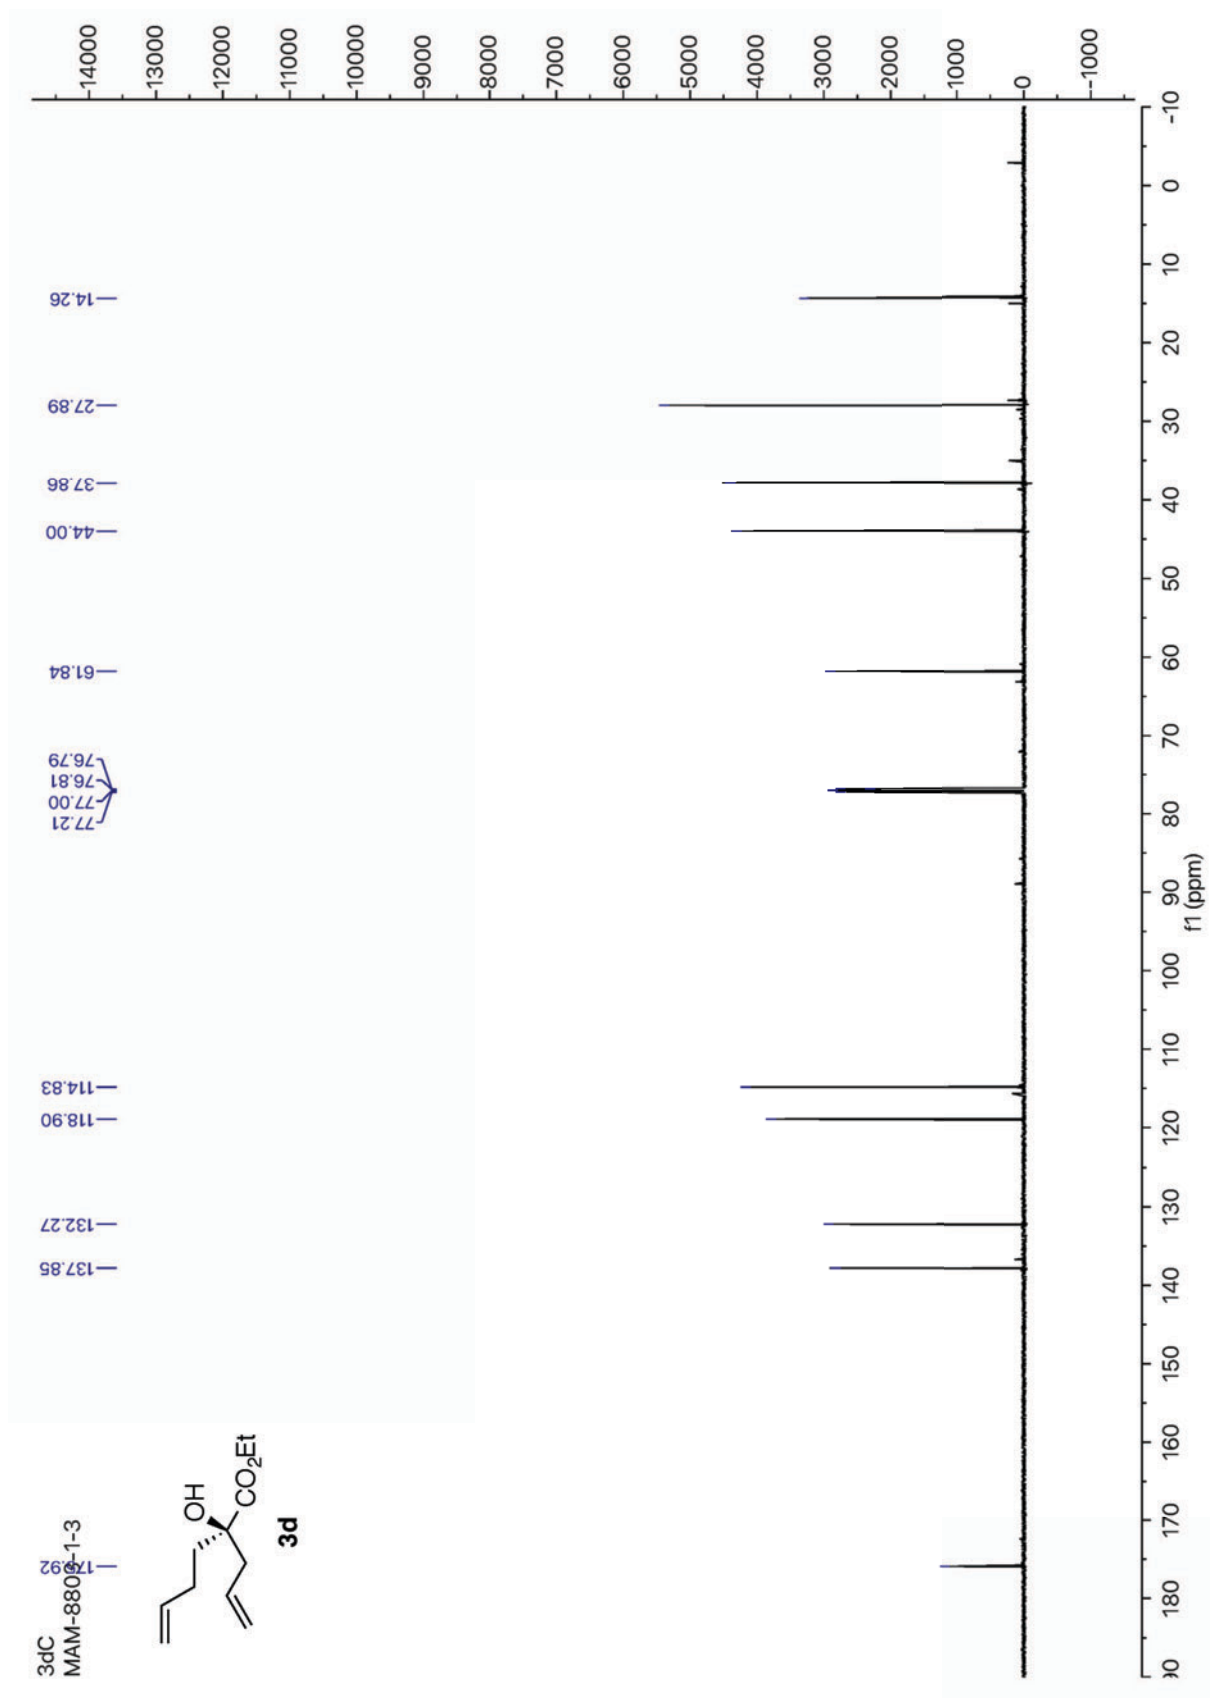

<sup>13</sup>C NMR spectra of compound **3d** (150 MHz, CDCl<sub>3</sub>)

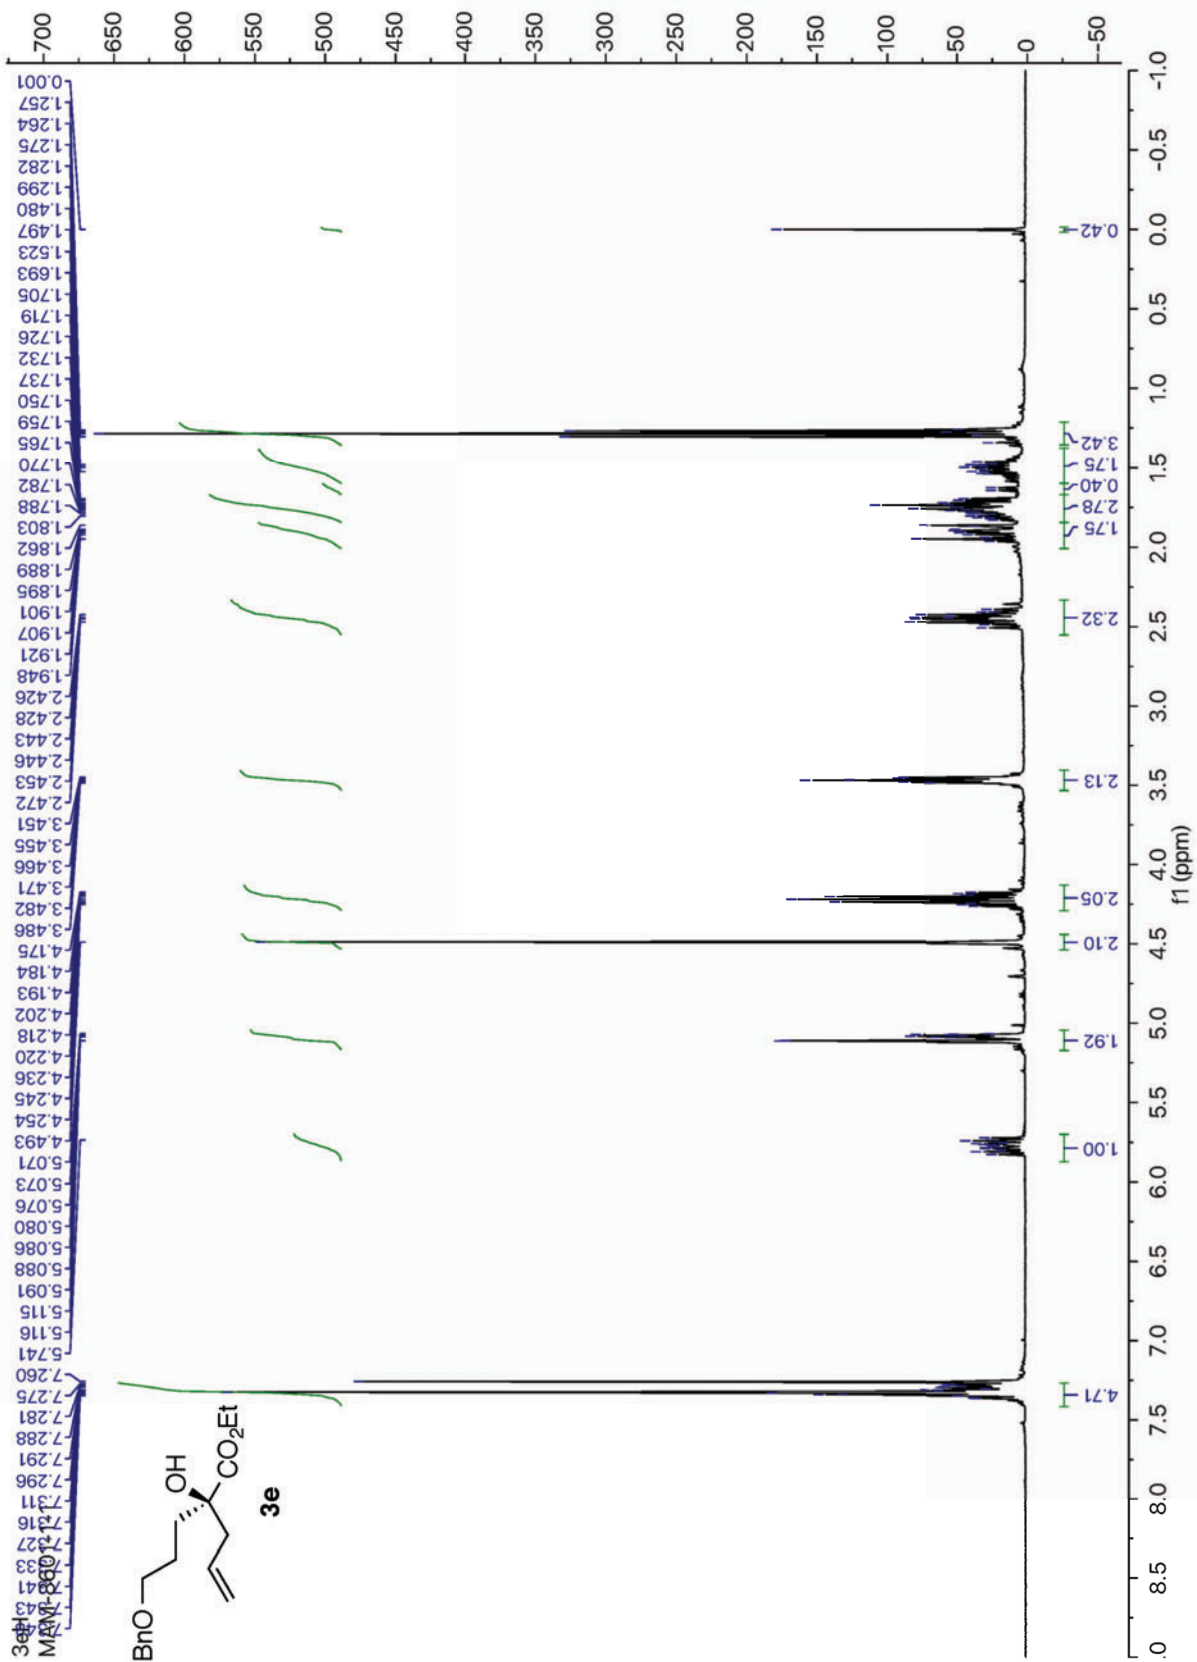

<sup>1</sup>H NMR spectra of compound **3e** (400 MHz, CDCl<sub>3</sub>)

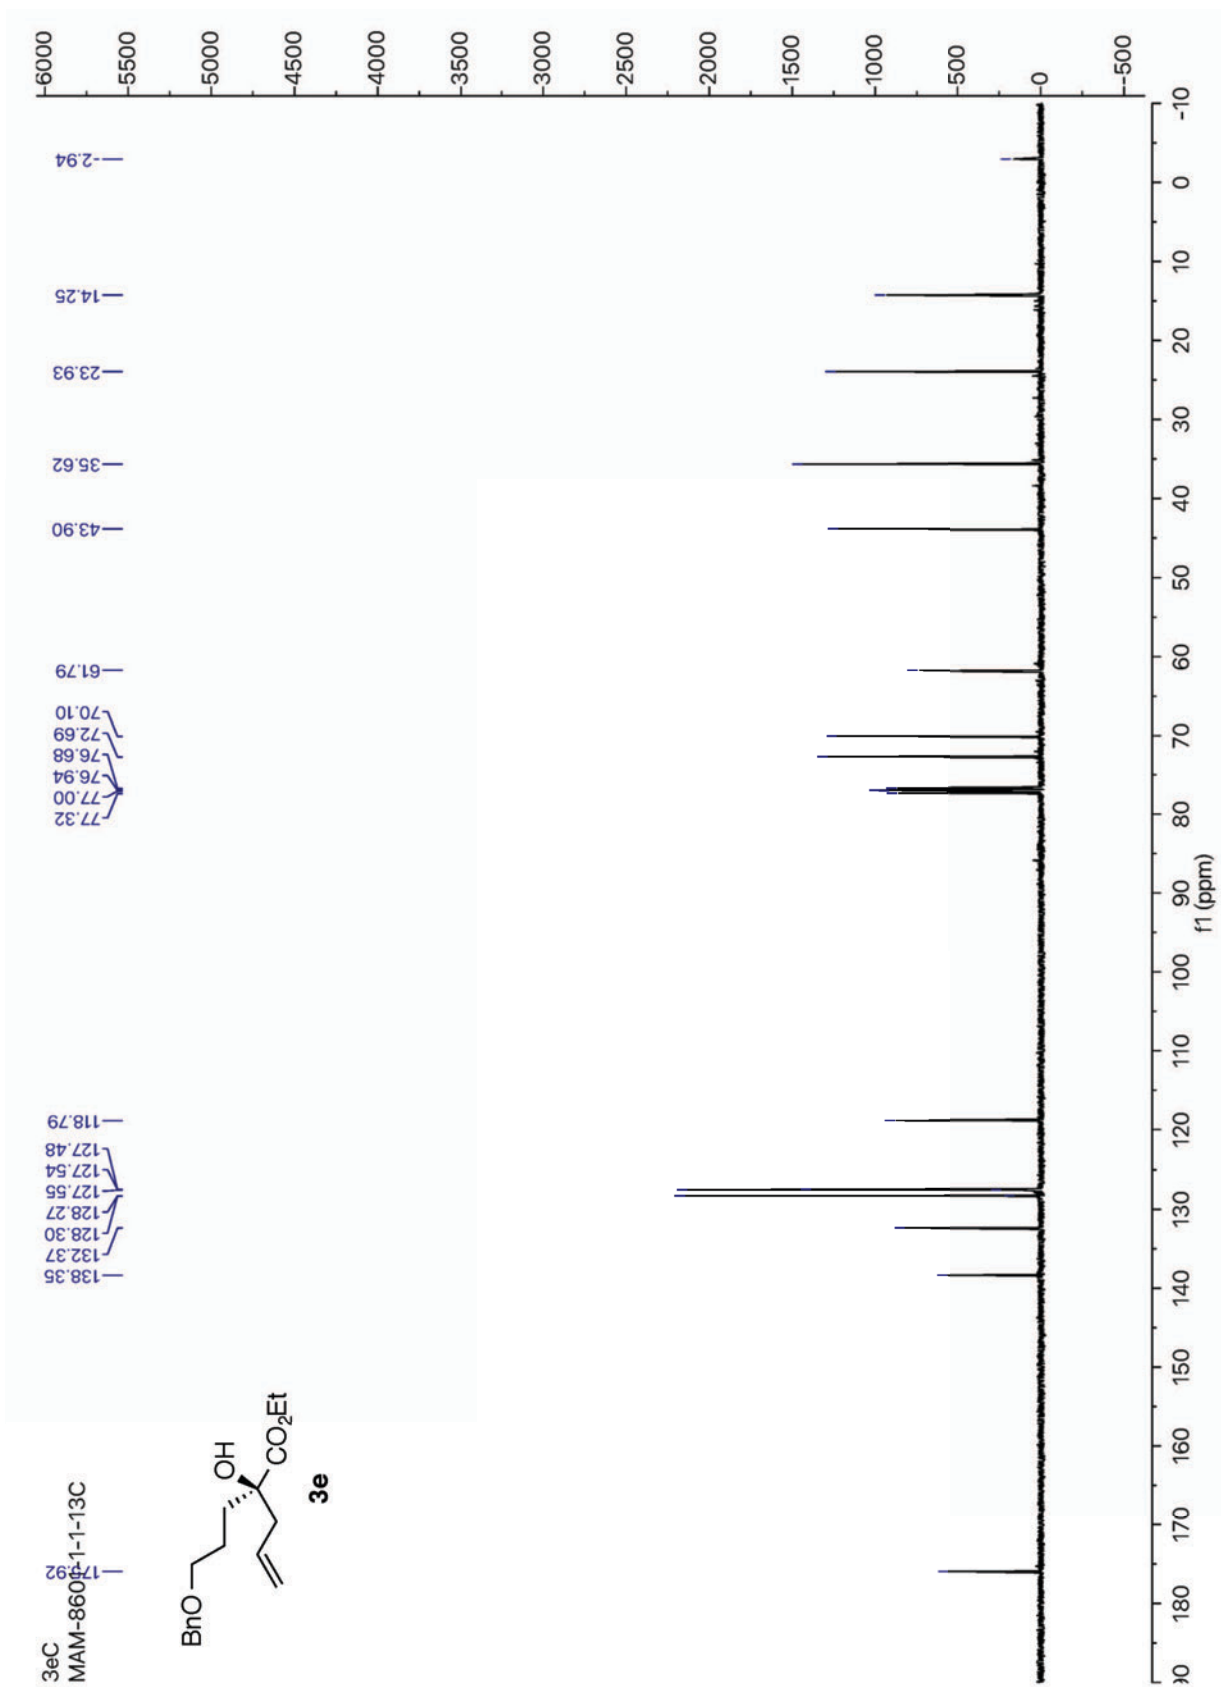

<sup>13</sup>C NMR spectra of compound **3e** (100 MHz, CDCl<sub>3</sub>)



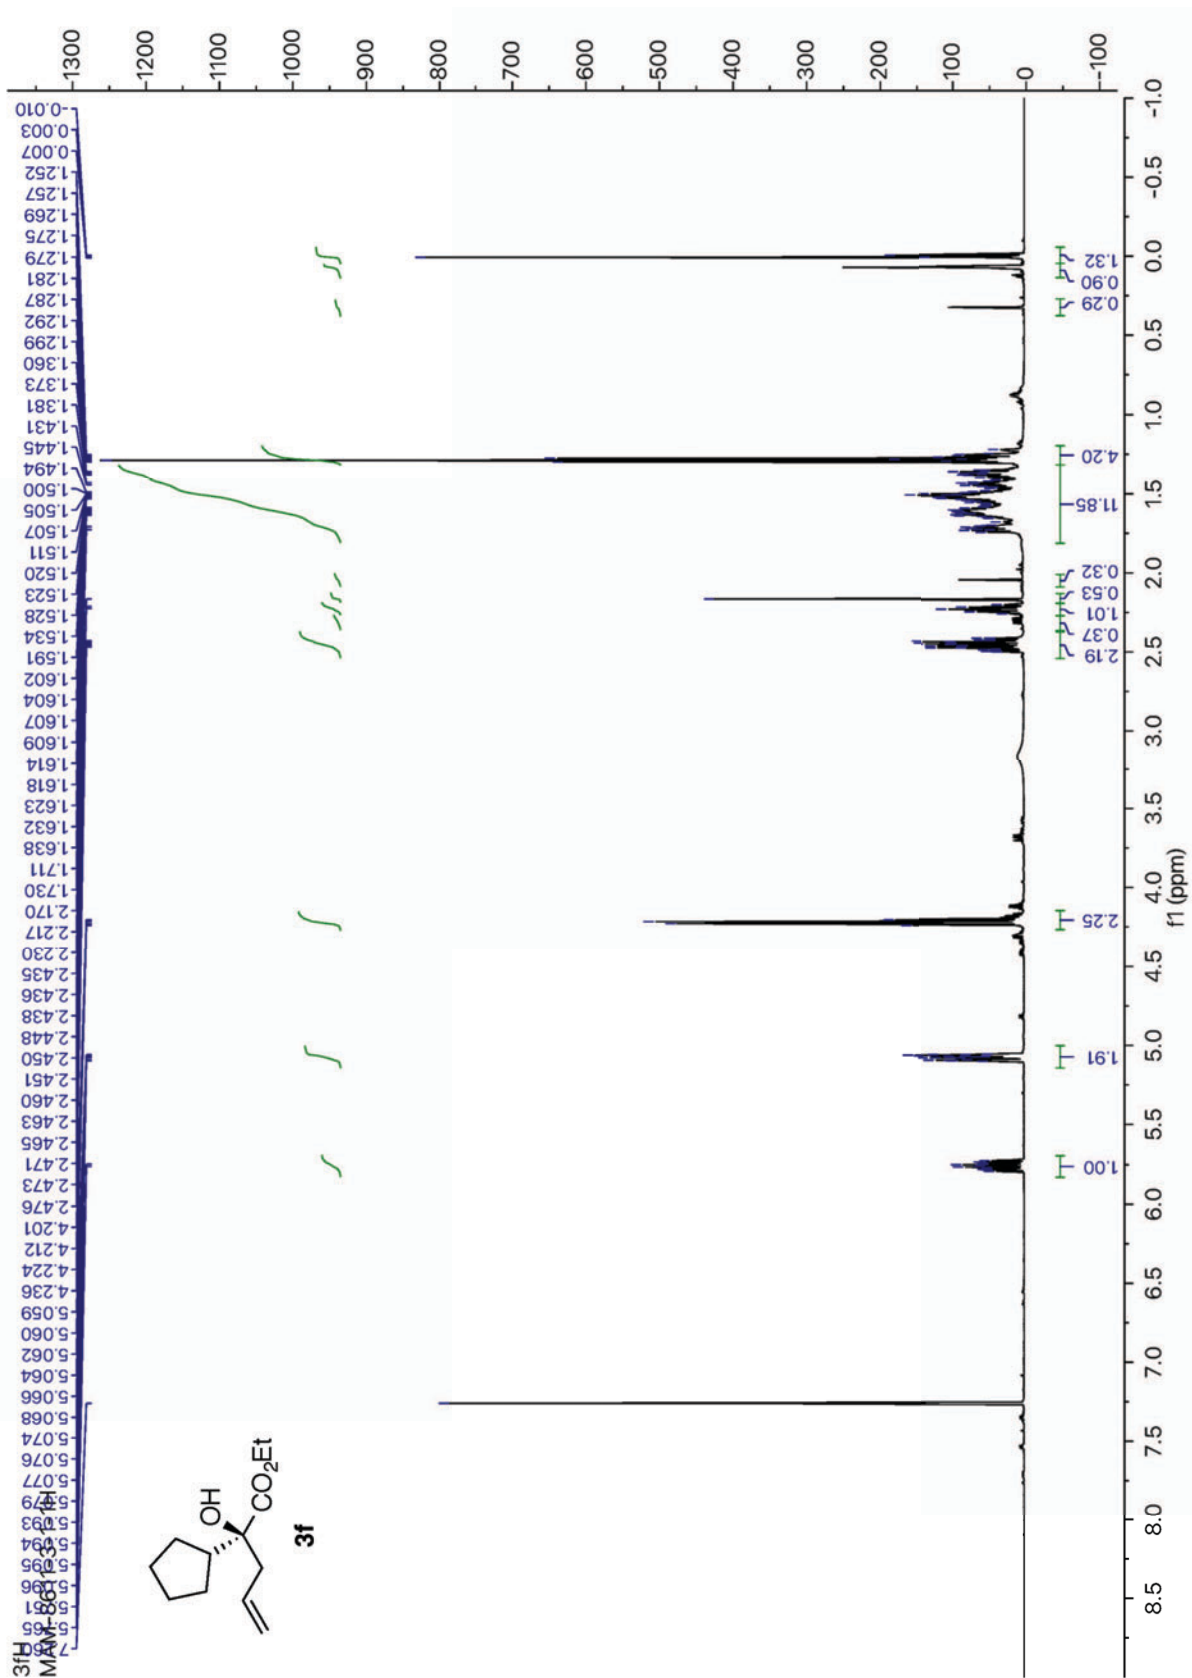

<sup>1</sup>H NMR spectra of compound **3f** (600 MHz, CDCl<sub>3</sub>)

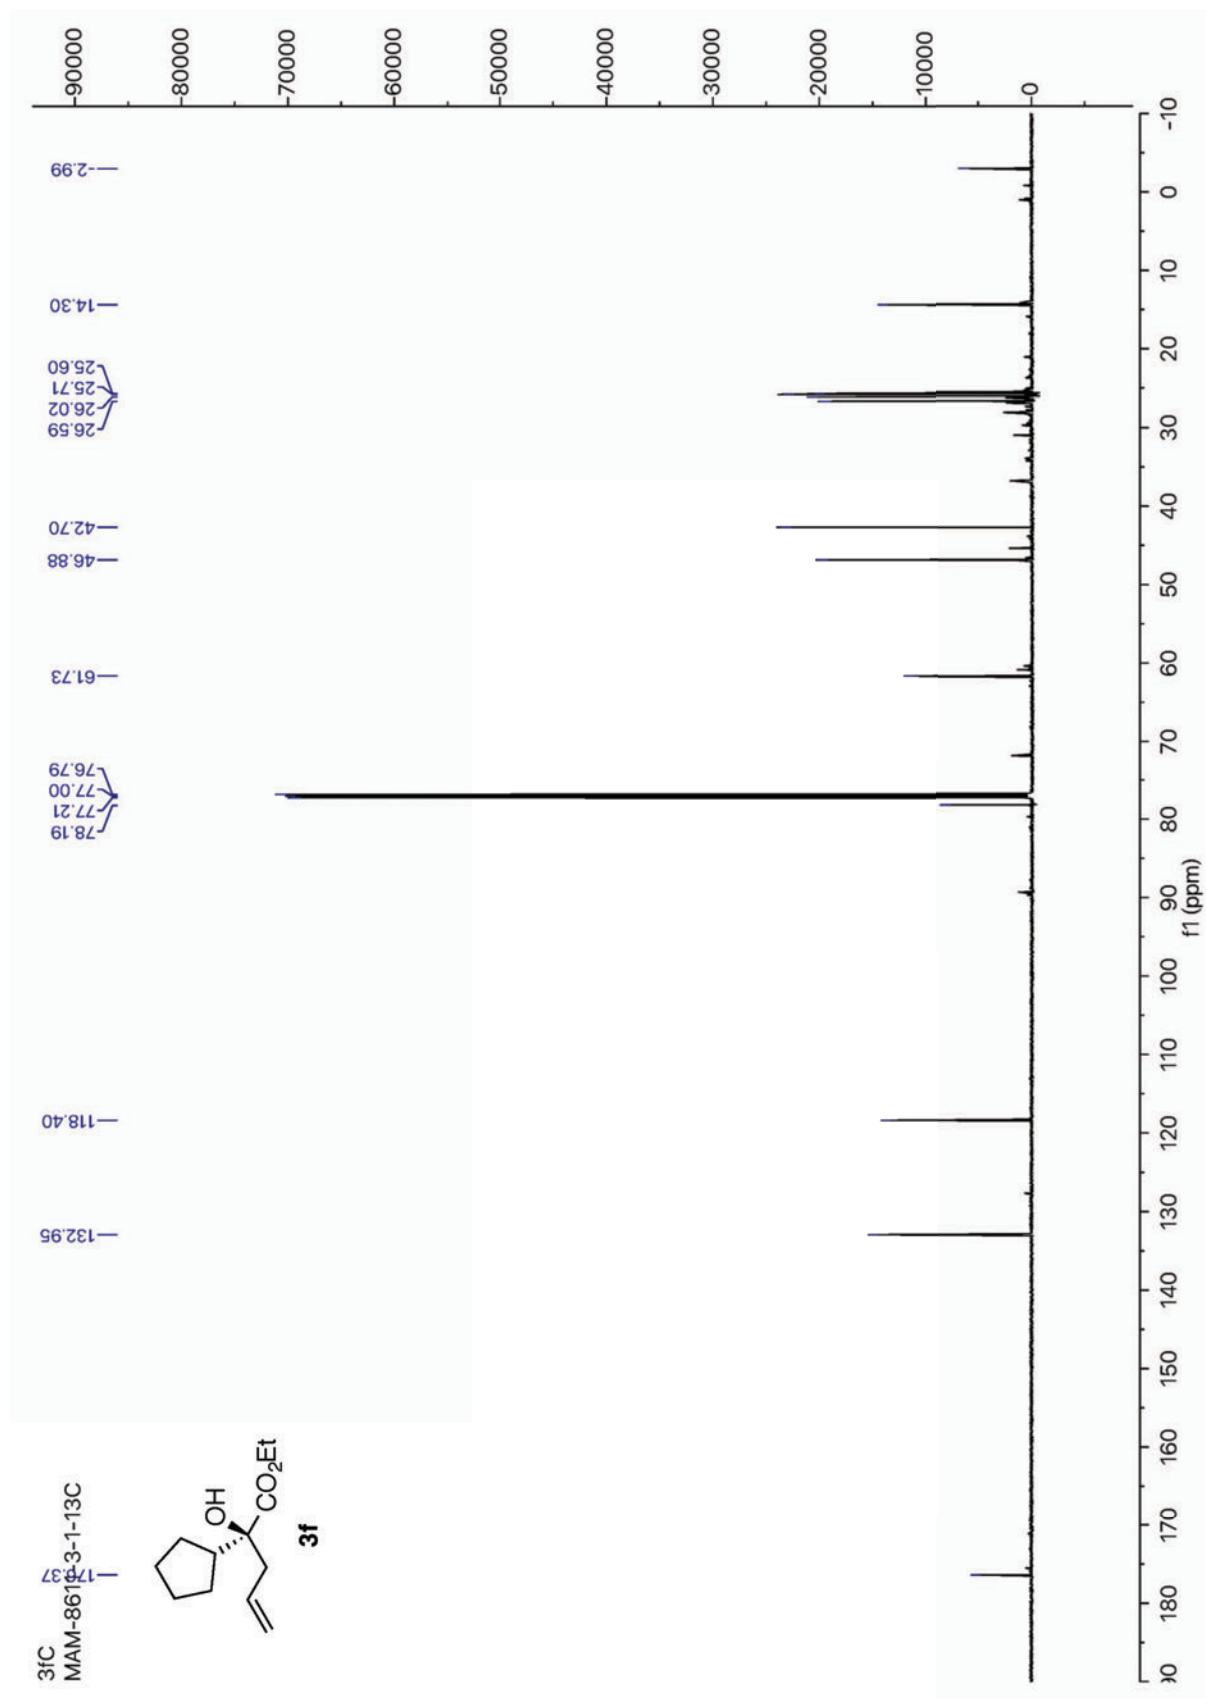

<sup>13</sup>C NMR spectra of compound **3f** (150 MHz, CDCl<sub>3</sub>)

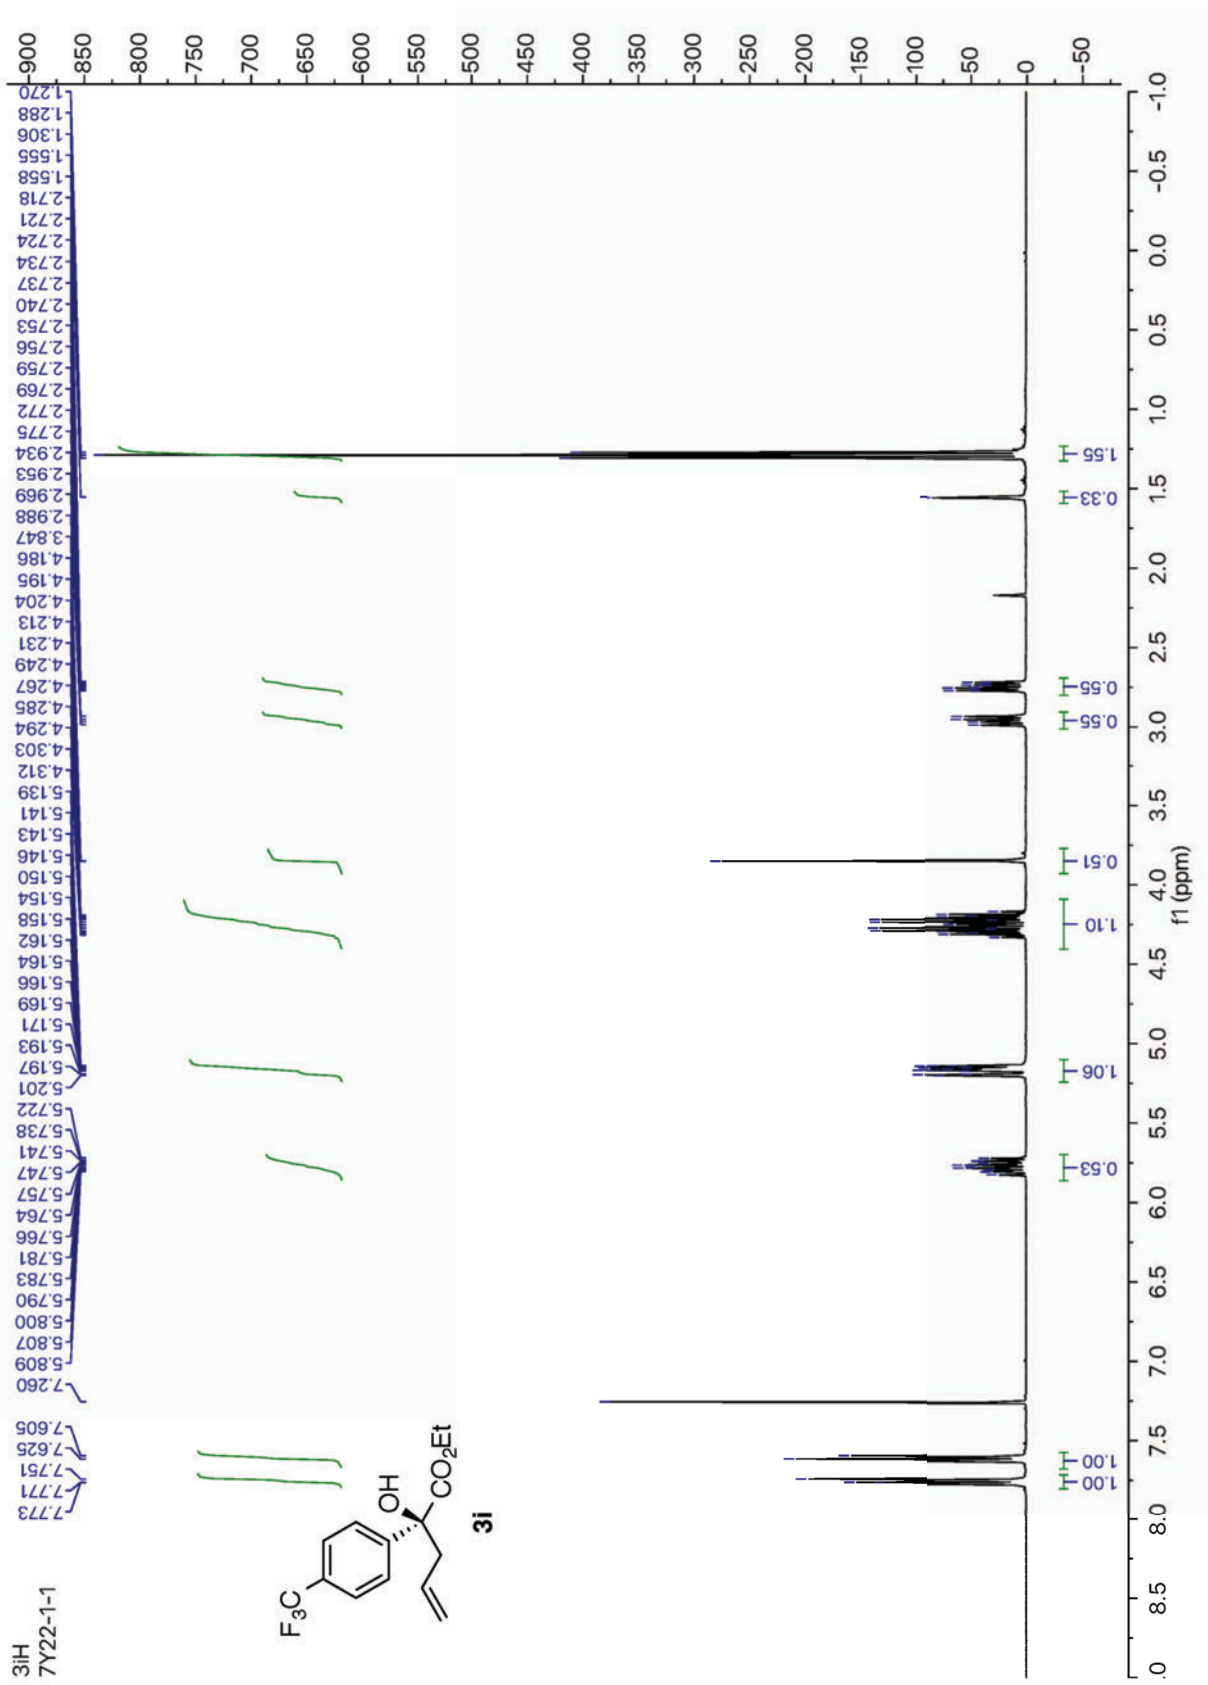

<sup>1</sup>H NMR spectra of compound **3i** (400 MHz, CDCl<sub>3</sub>)

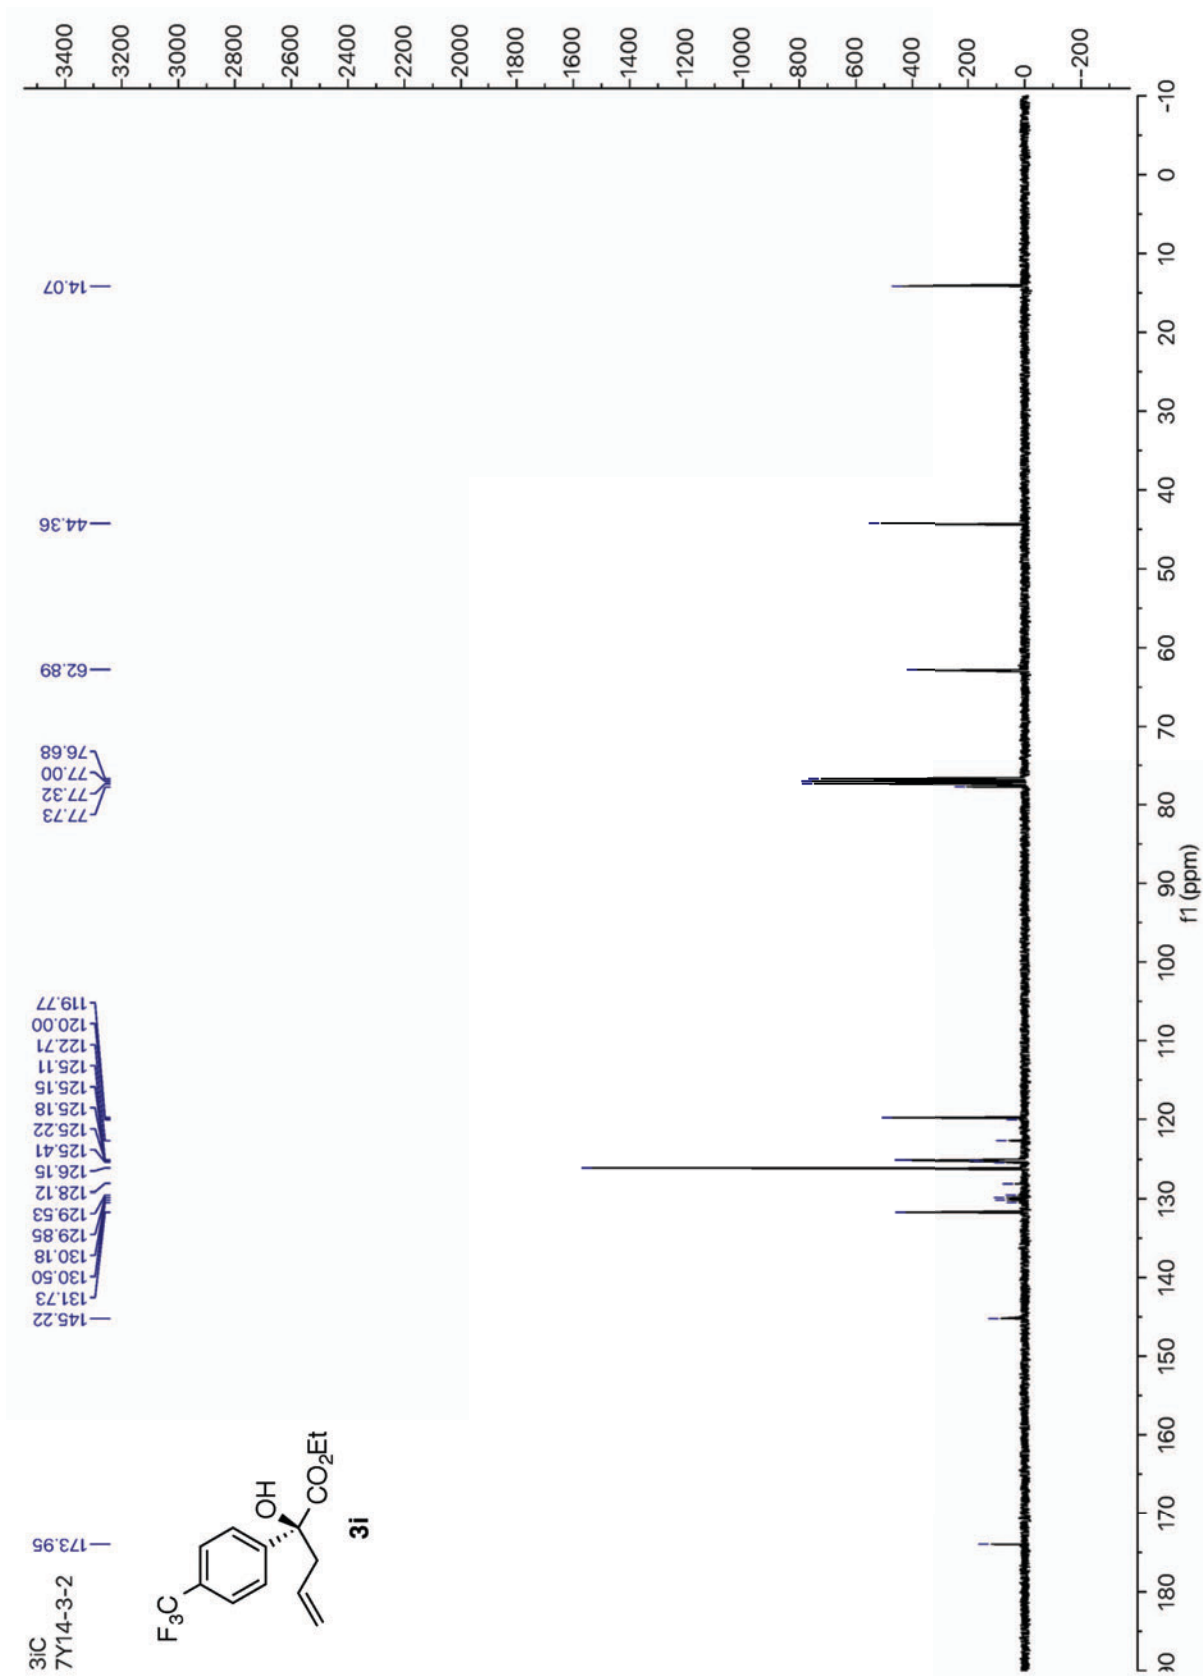

$^{13}\text{C}$  NMR spectra of compound **3i** (100 MHz,  $\text{CDCl}_3$ )

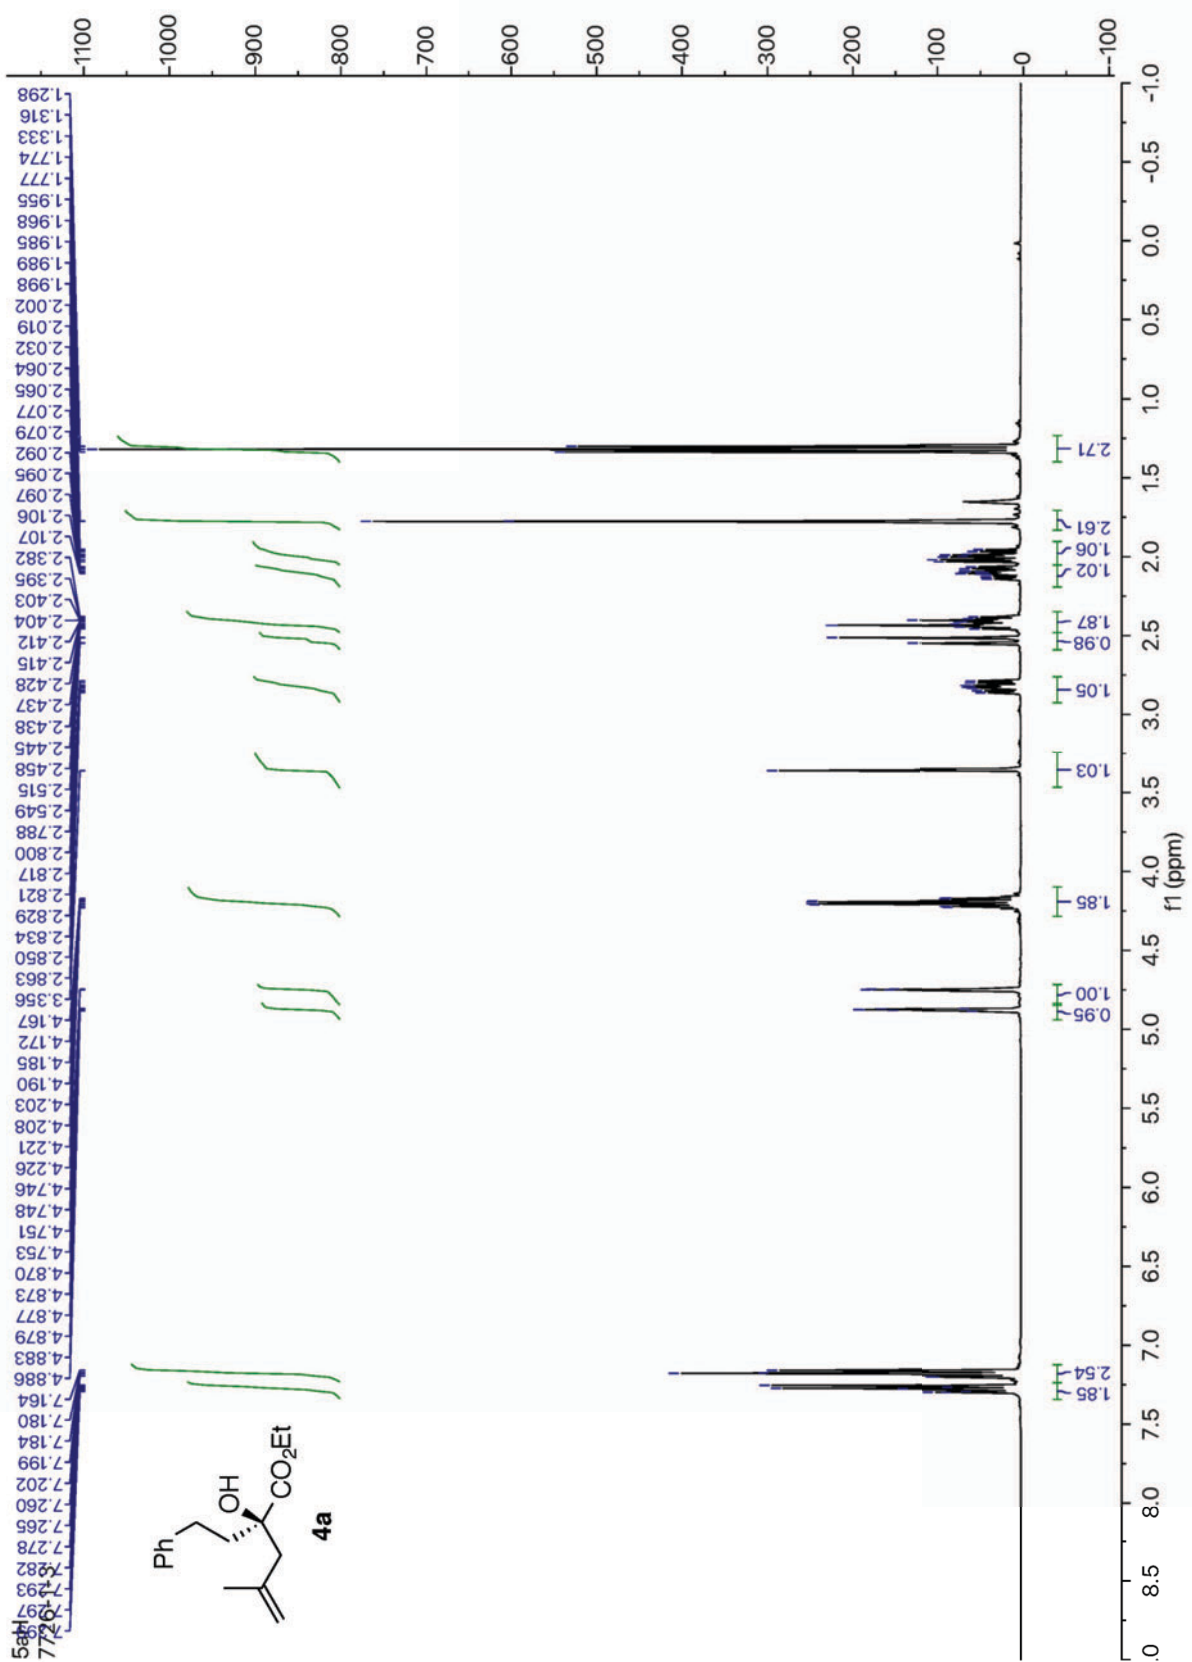

<sup>1</sup>H NMR spectra of compound **4a** (400 MHz, CDCl<sub>3</sub>)

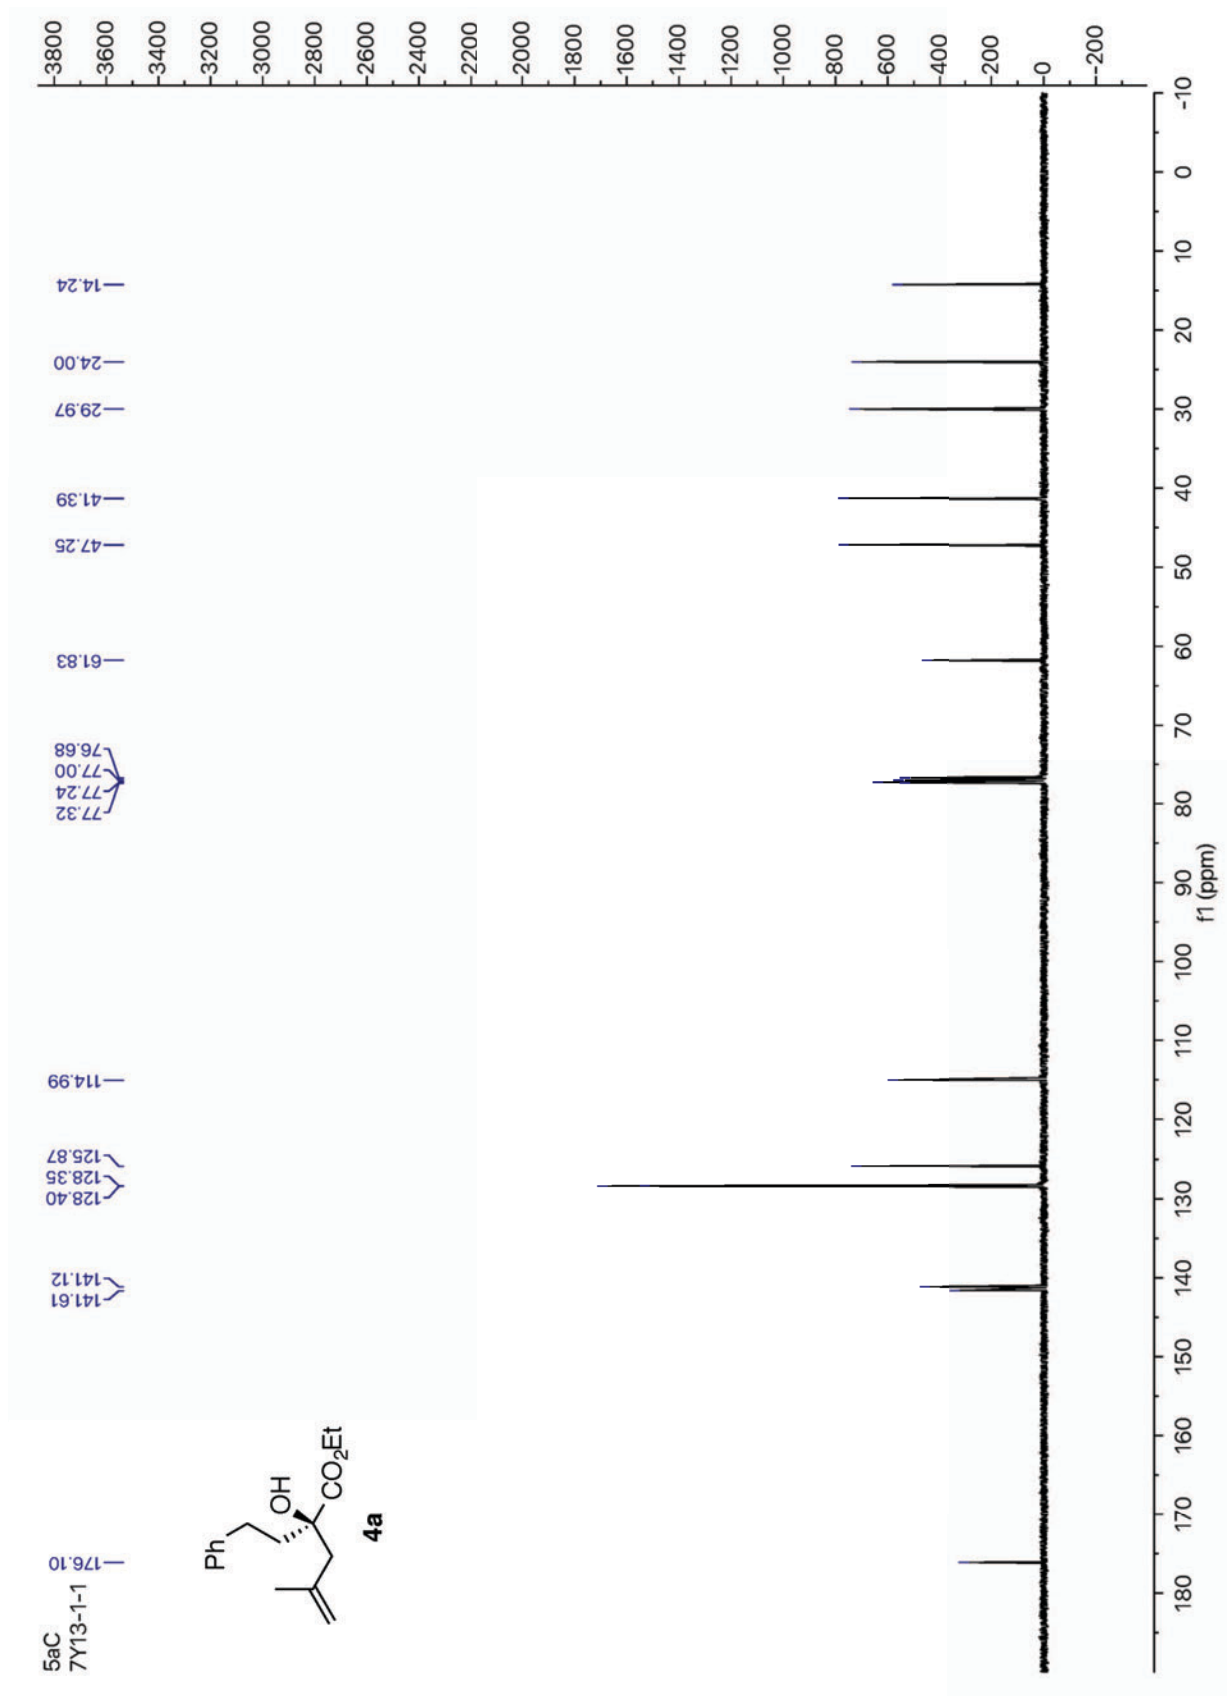

<sup>13</sup>C NMR spectra of compound **4a** (100 MHz, CDCl<sub>3</sub>)

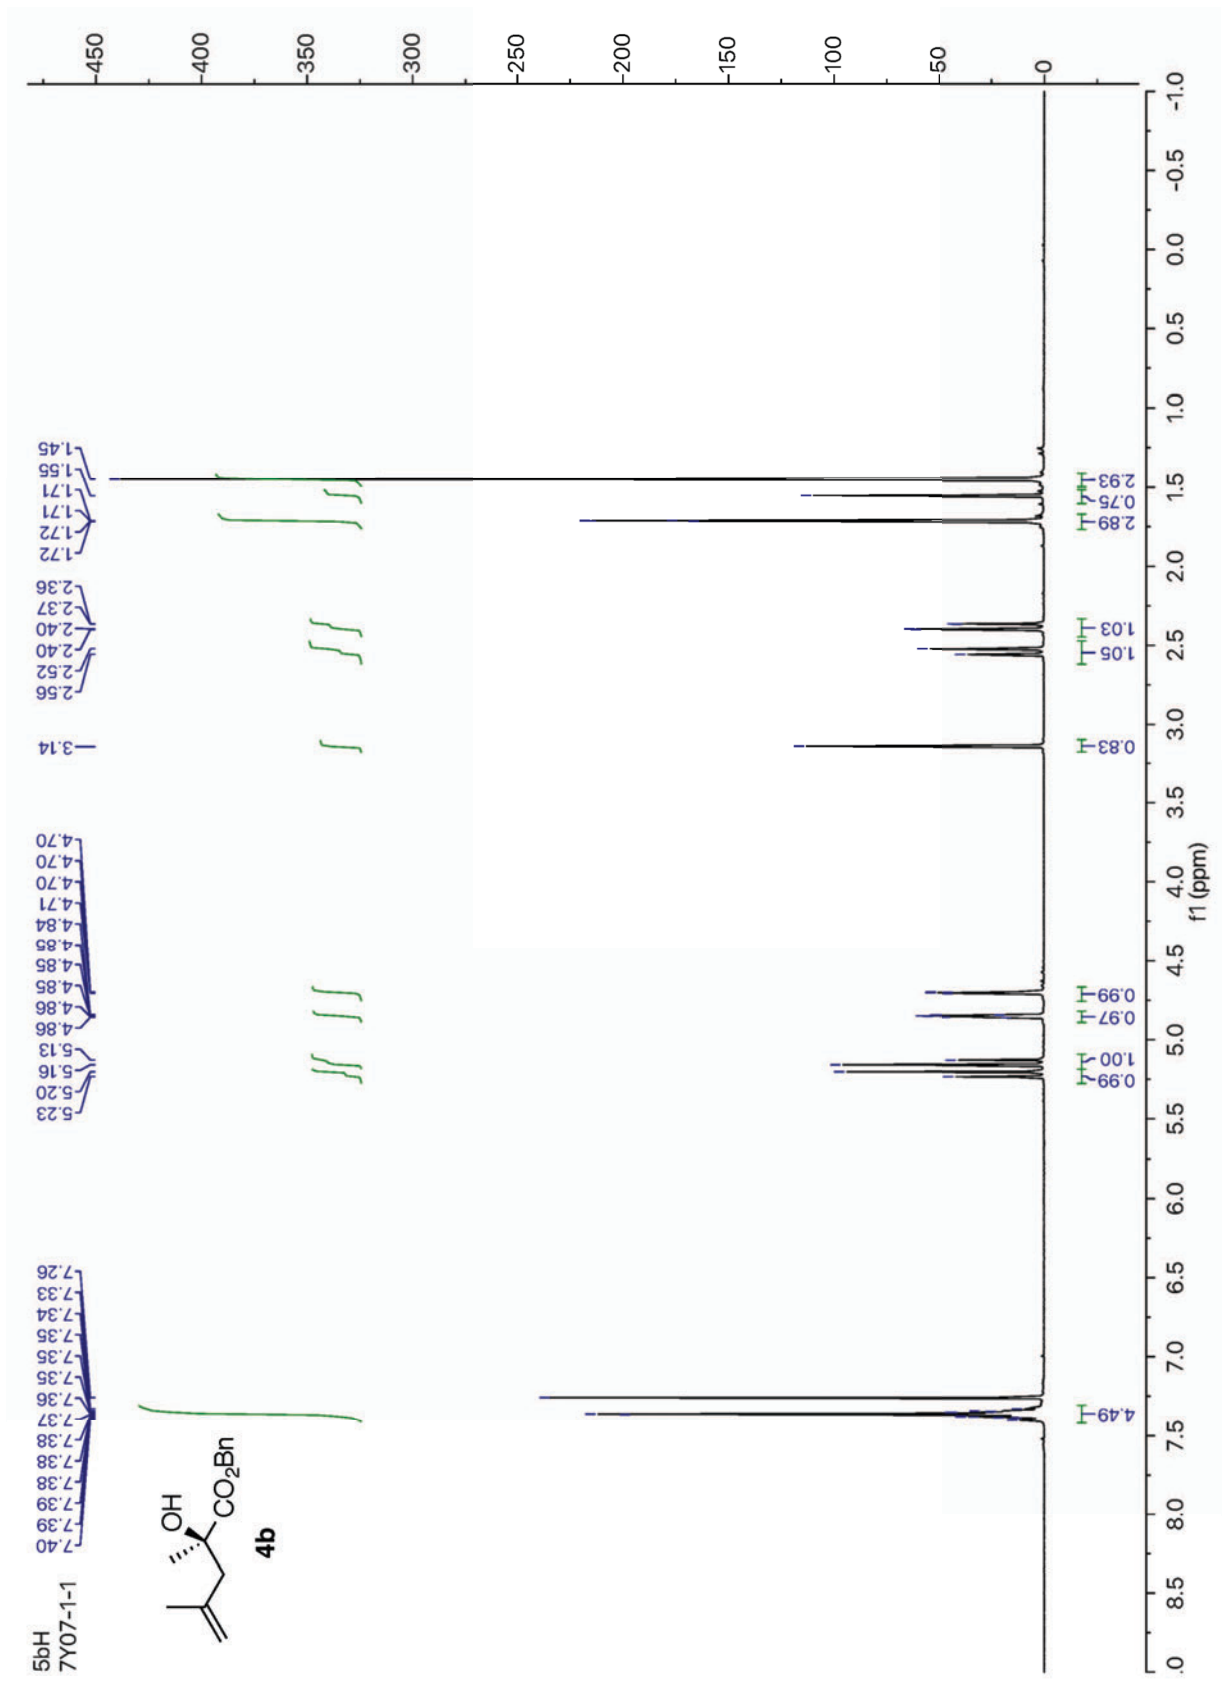

<sup>1</sup>H NMR spectra of compound **4b** (400 MHz, CDCl<sub>3</sub>)

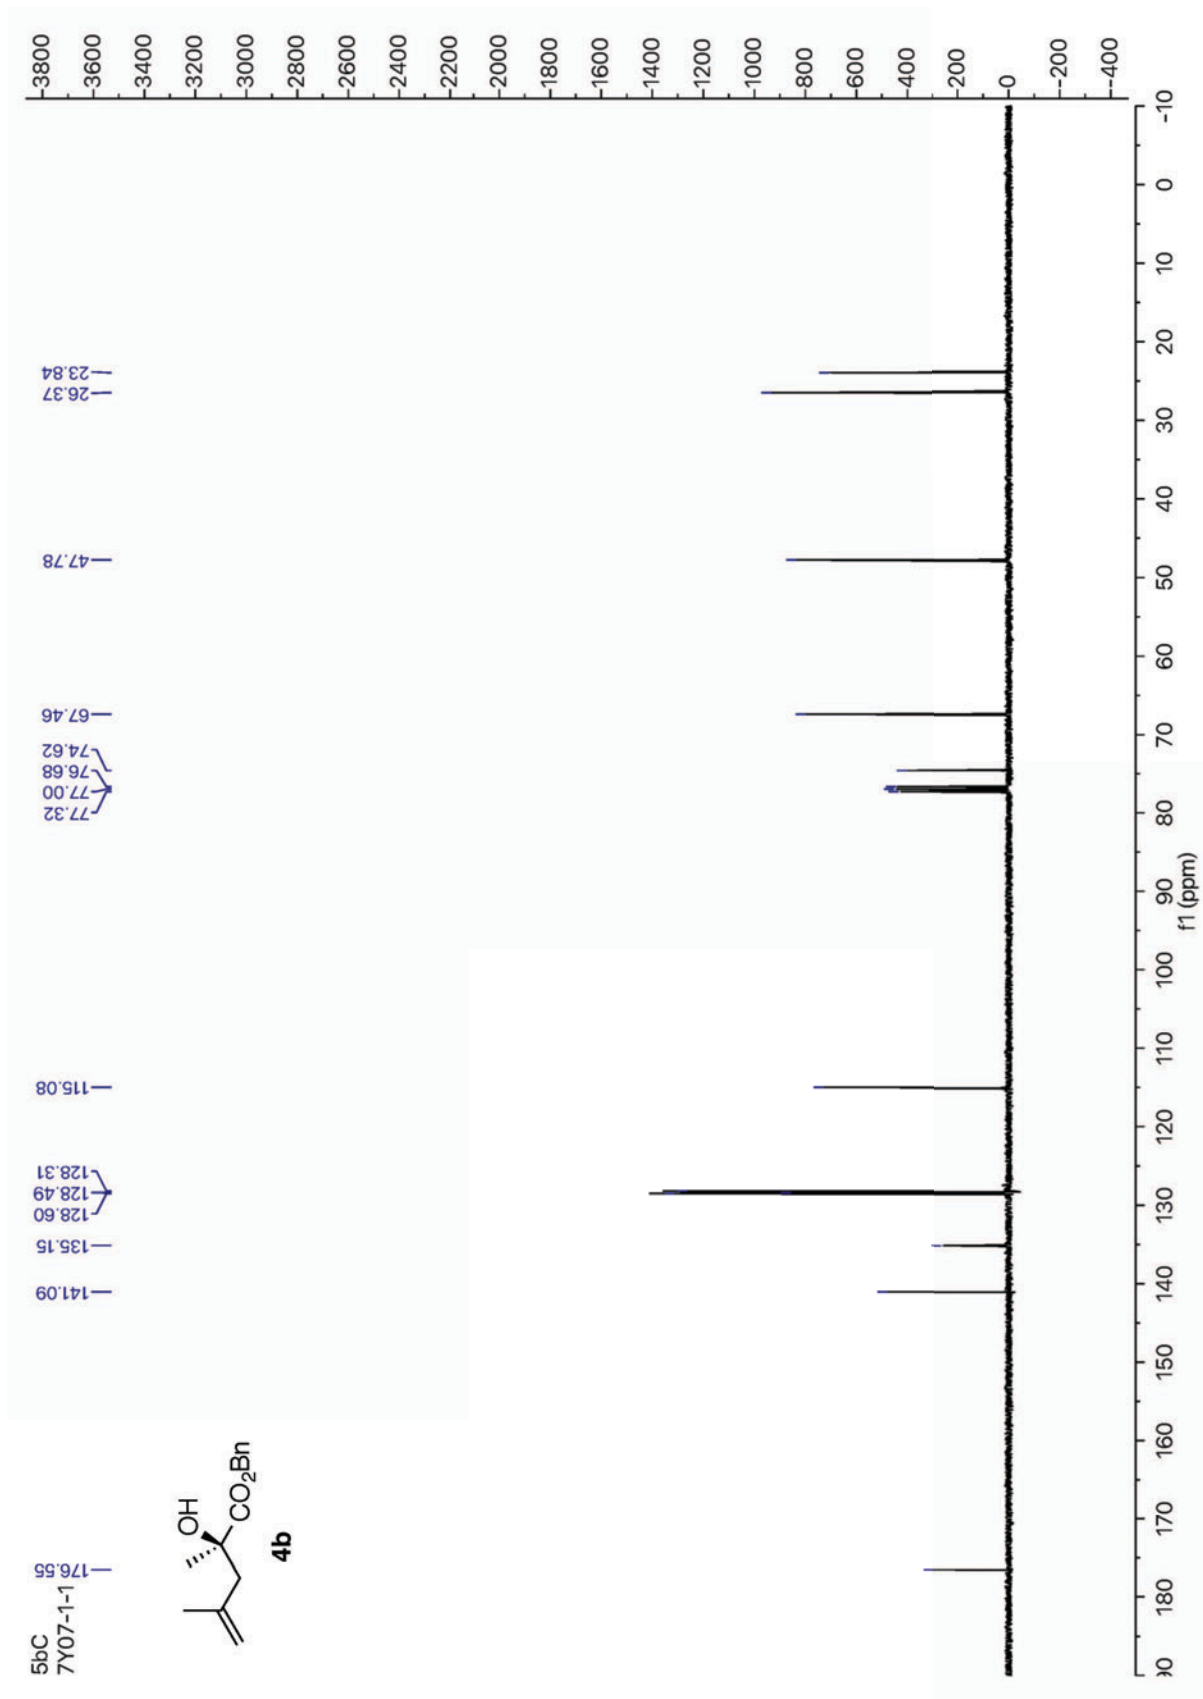

<sup>13</sup>C NMR spectra of compound **4b** (100 MHz, CDCl<sub>3</sub>)



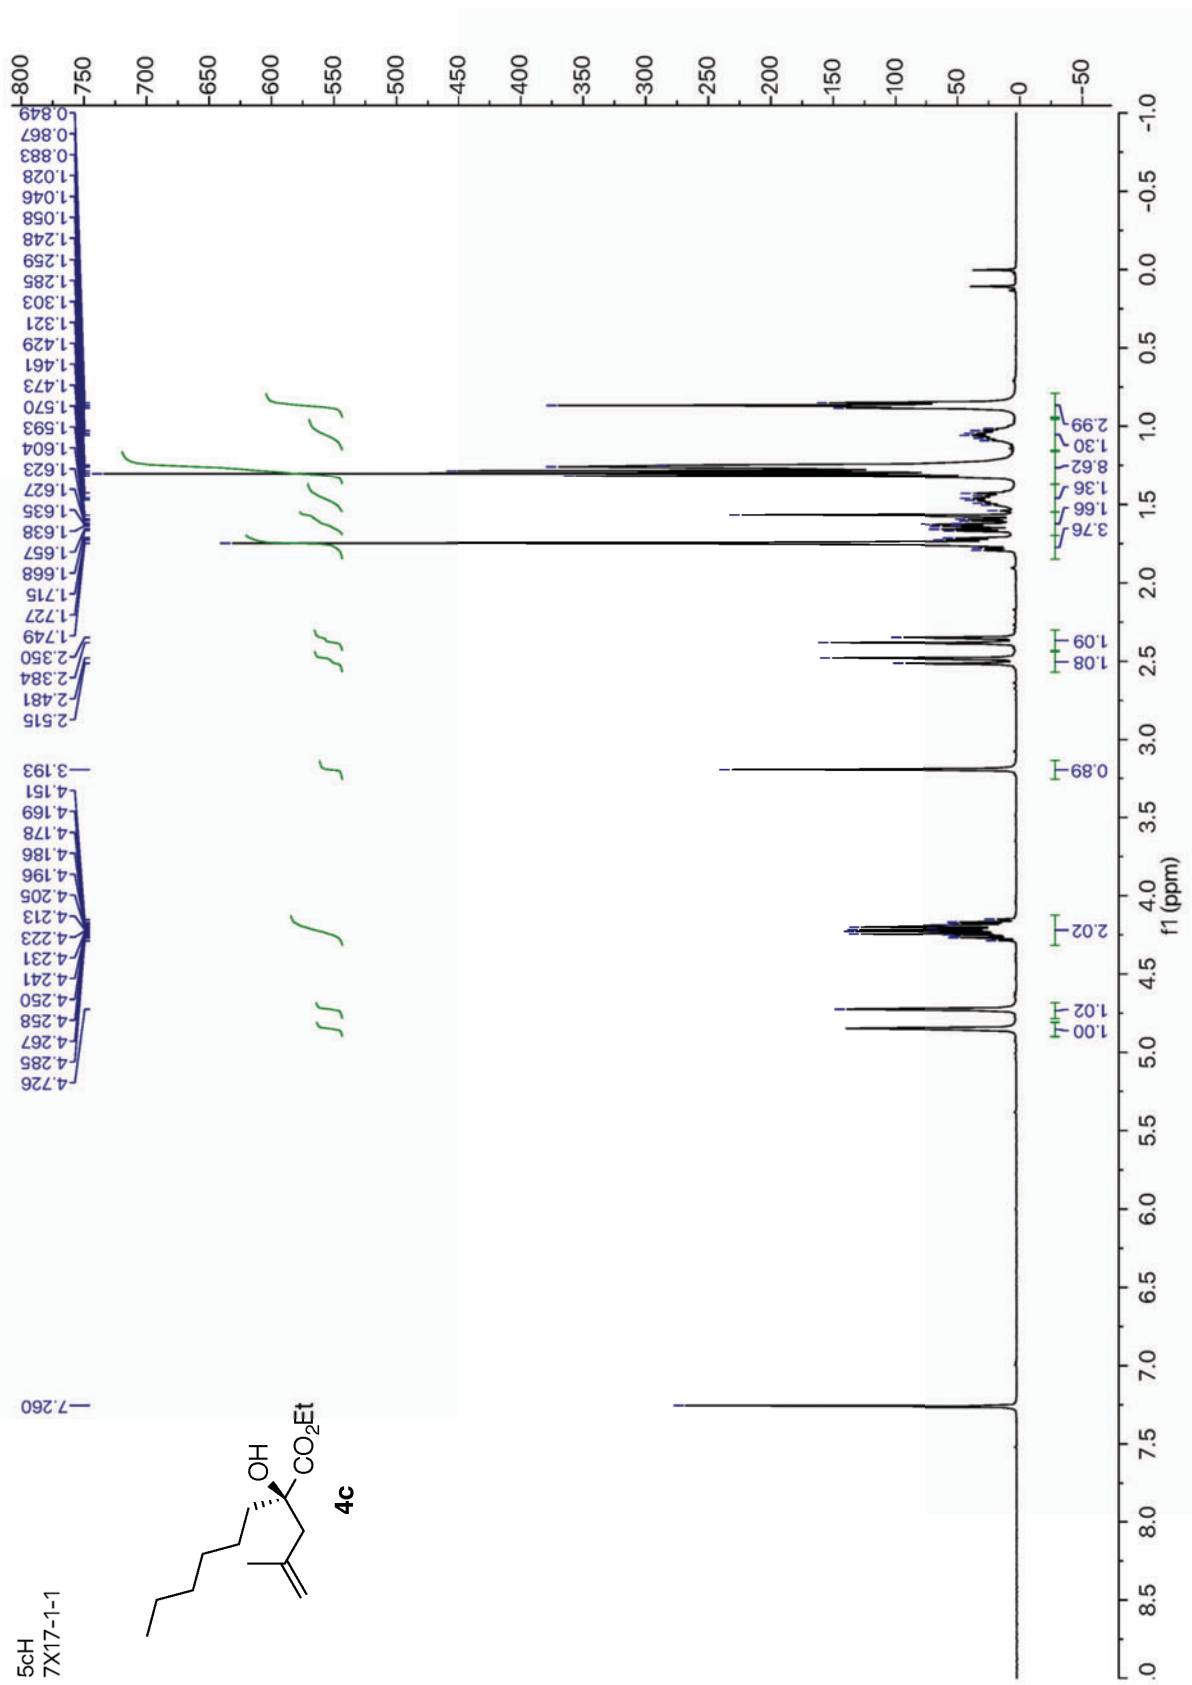

<sup>1</sup>H NMR spectra of compound **4c** (400 MHz, CDCl<sub>3</sub>)

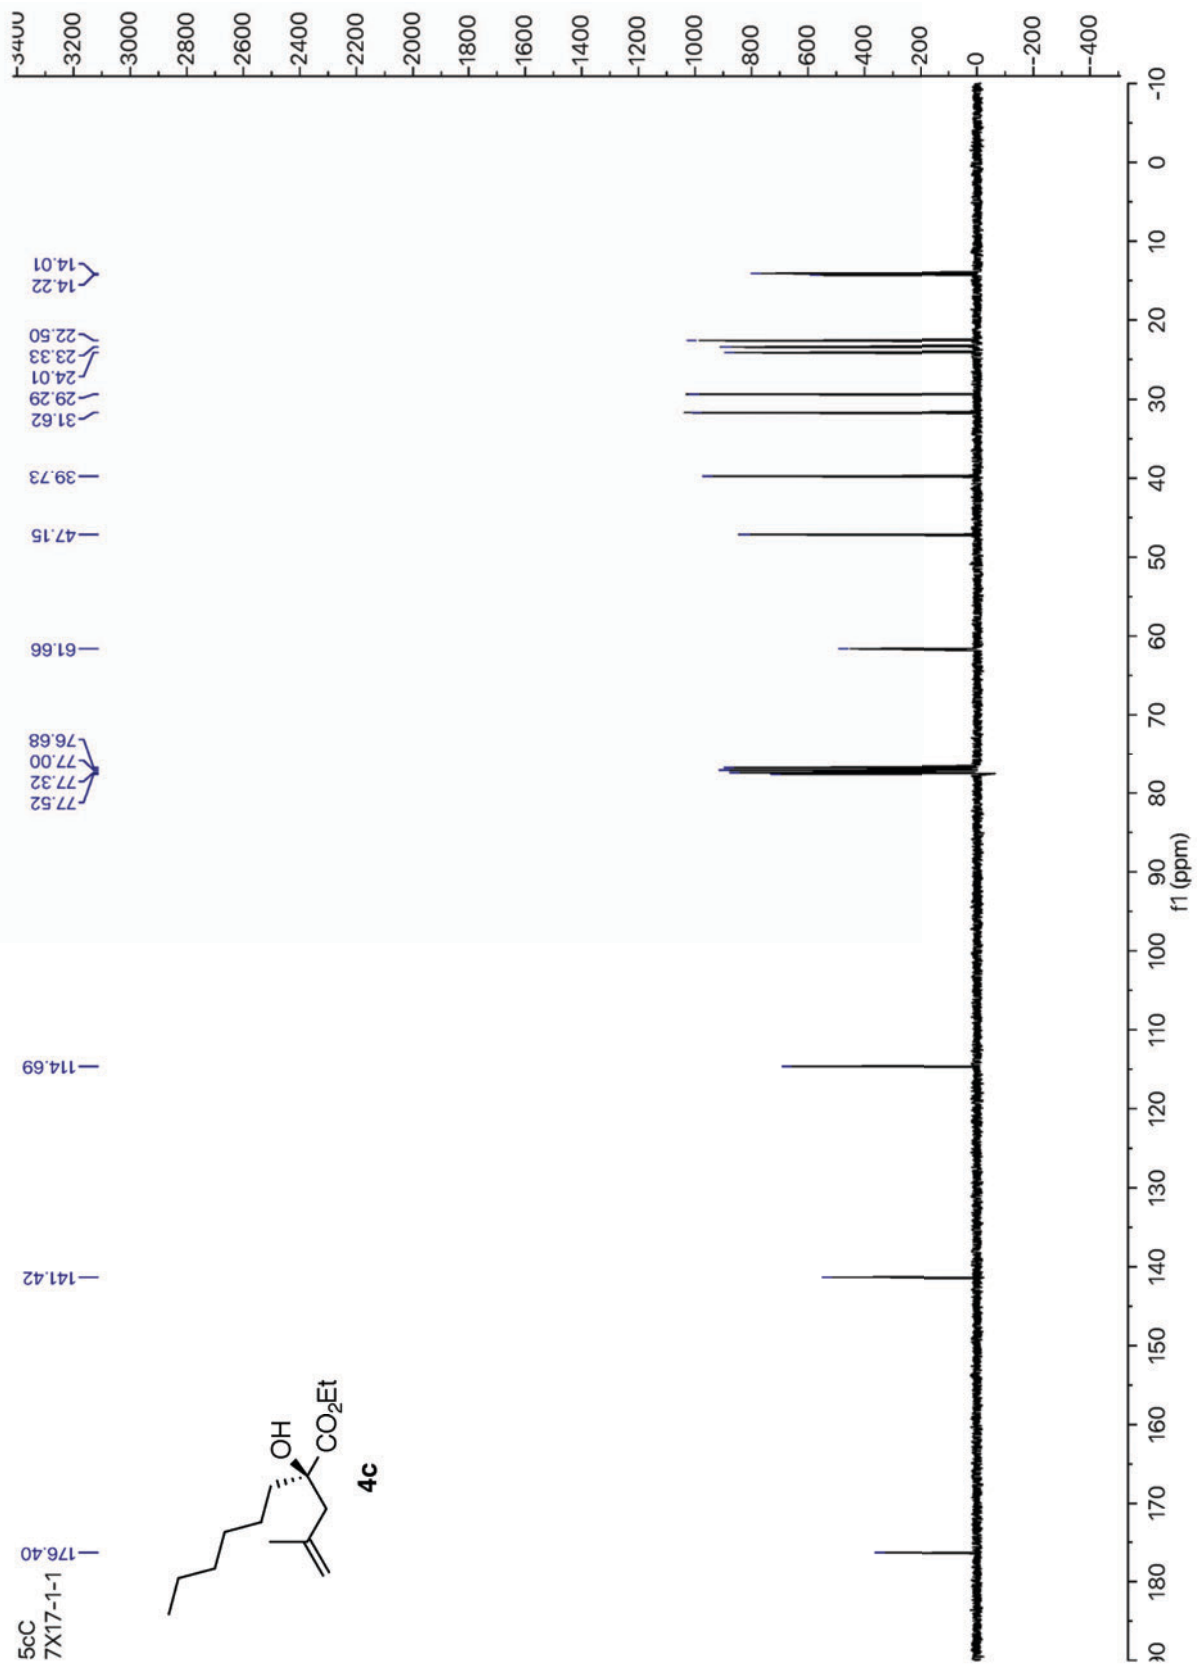

<sup>13</sup>C NMR spectra of compound **4c** (100 MHz, CDCl<sub>3</sub>)

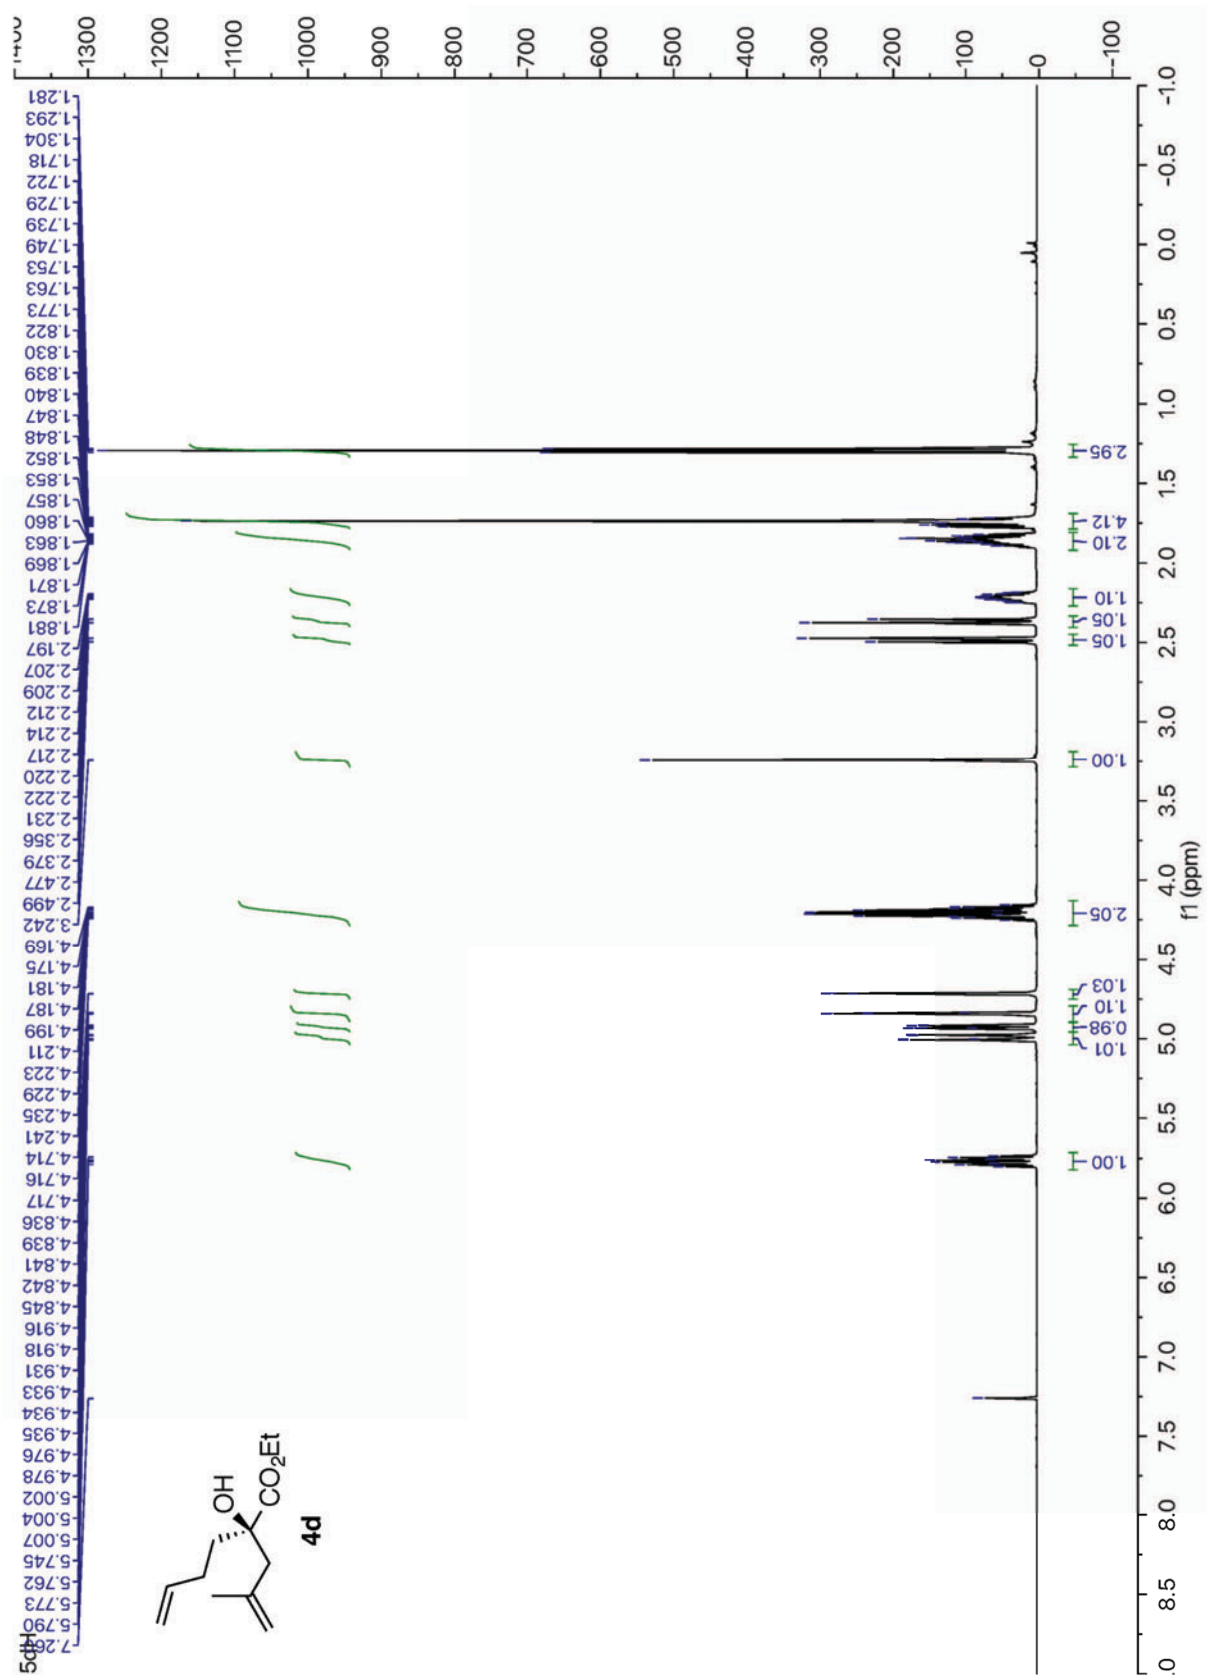

<sup>1</sup>H NMR spectra of compound **4d** (600 MHz, CDCl<sub>3</sub>)

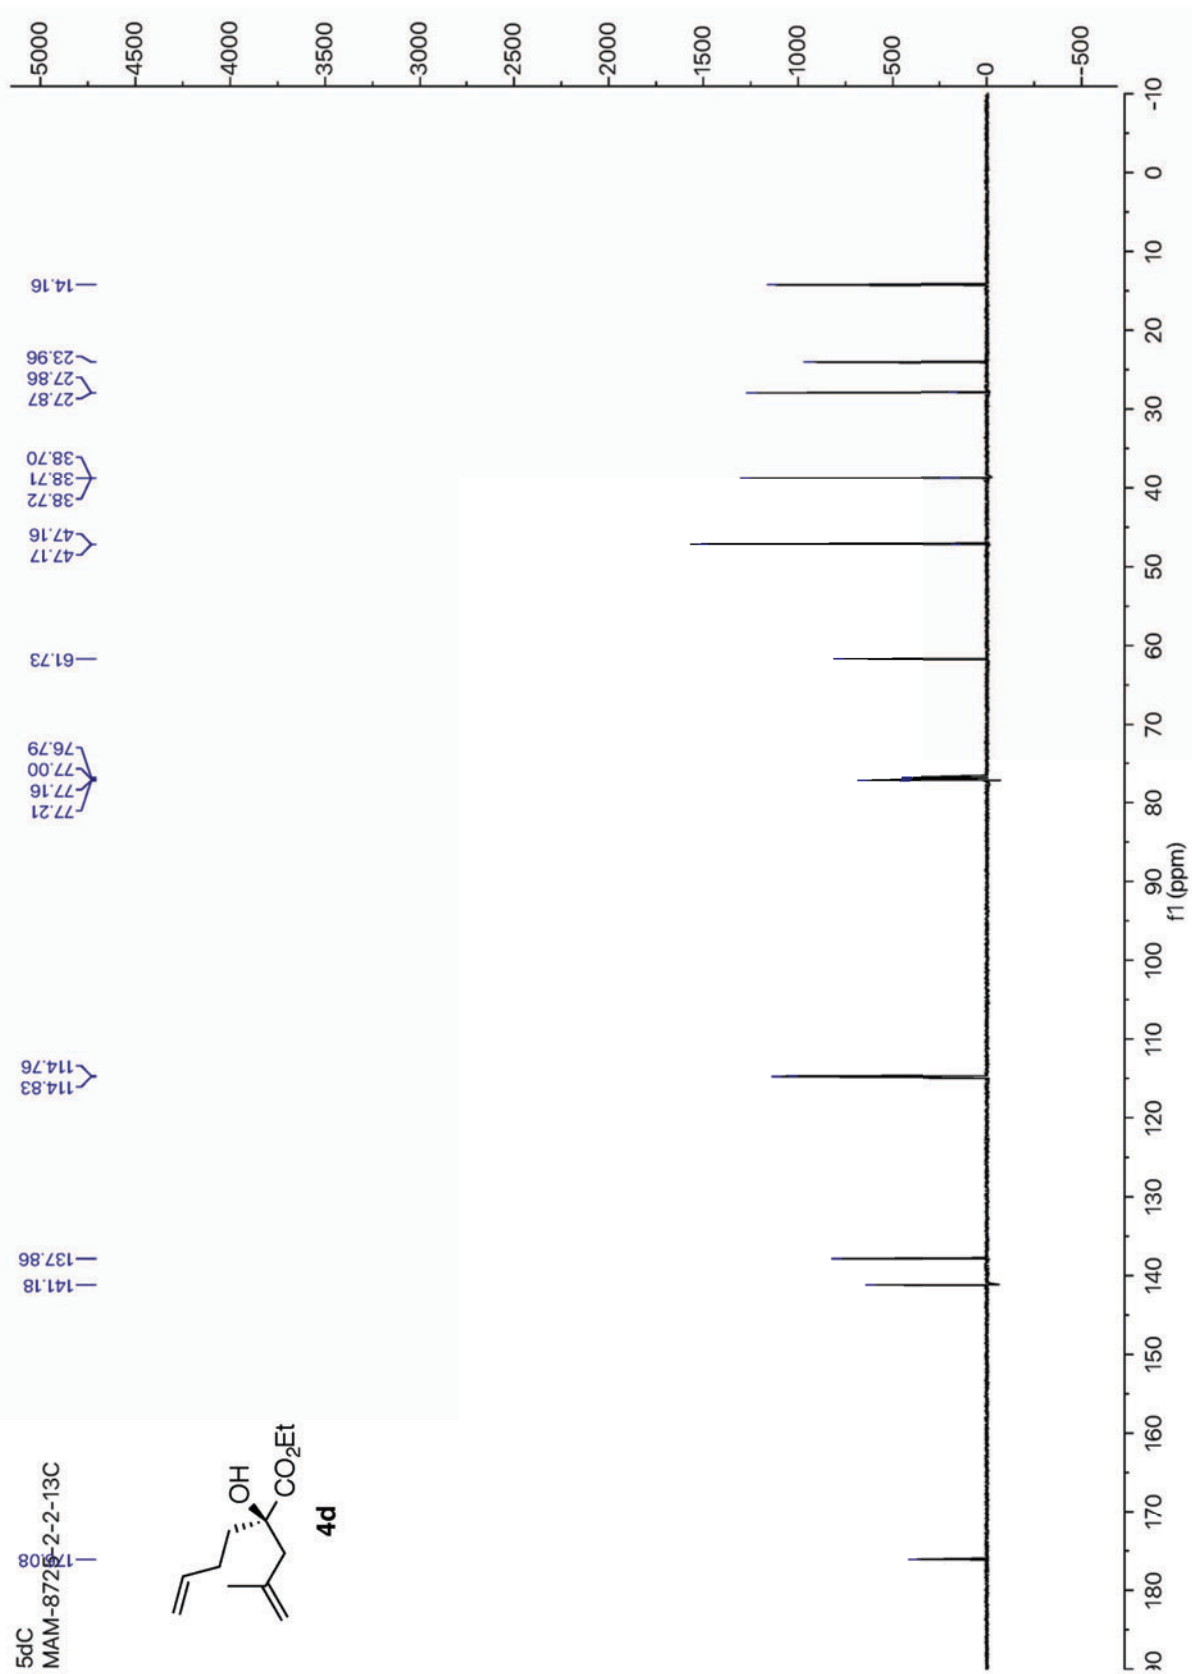

<sup>13</sup>C NMR spectra of compound **4d** (150 MHz, CDCl<sub>3</sub>)

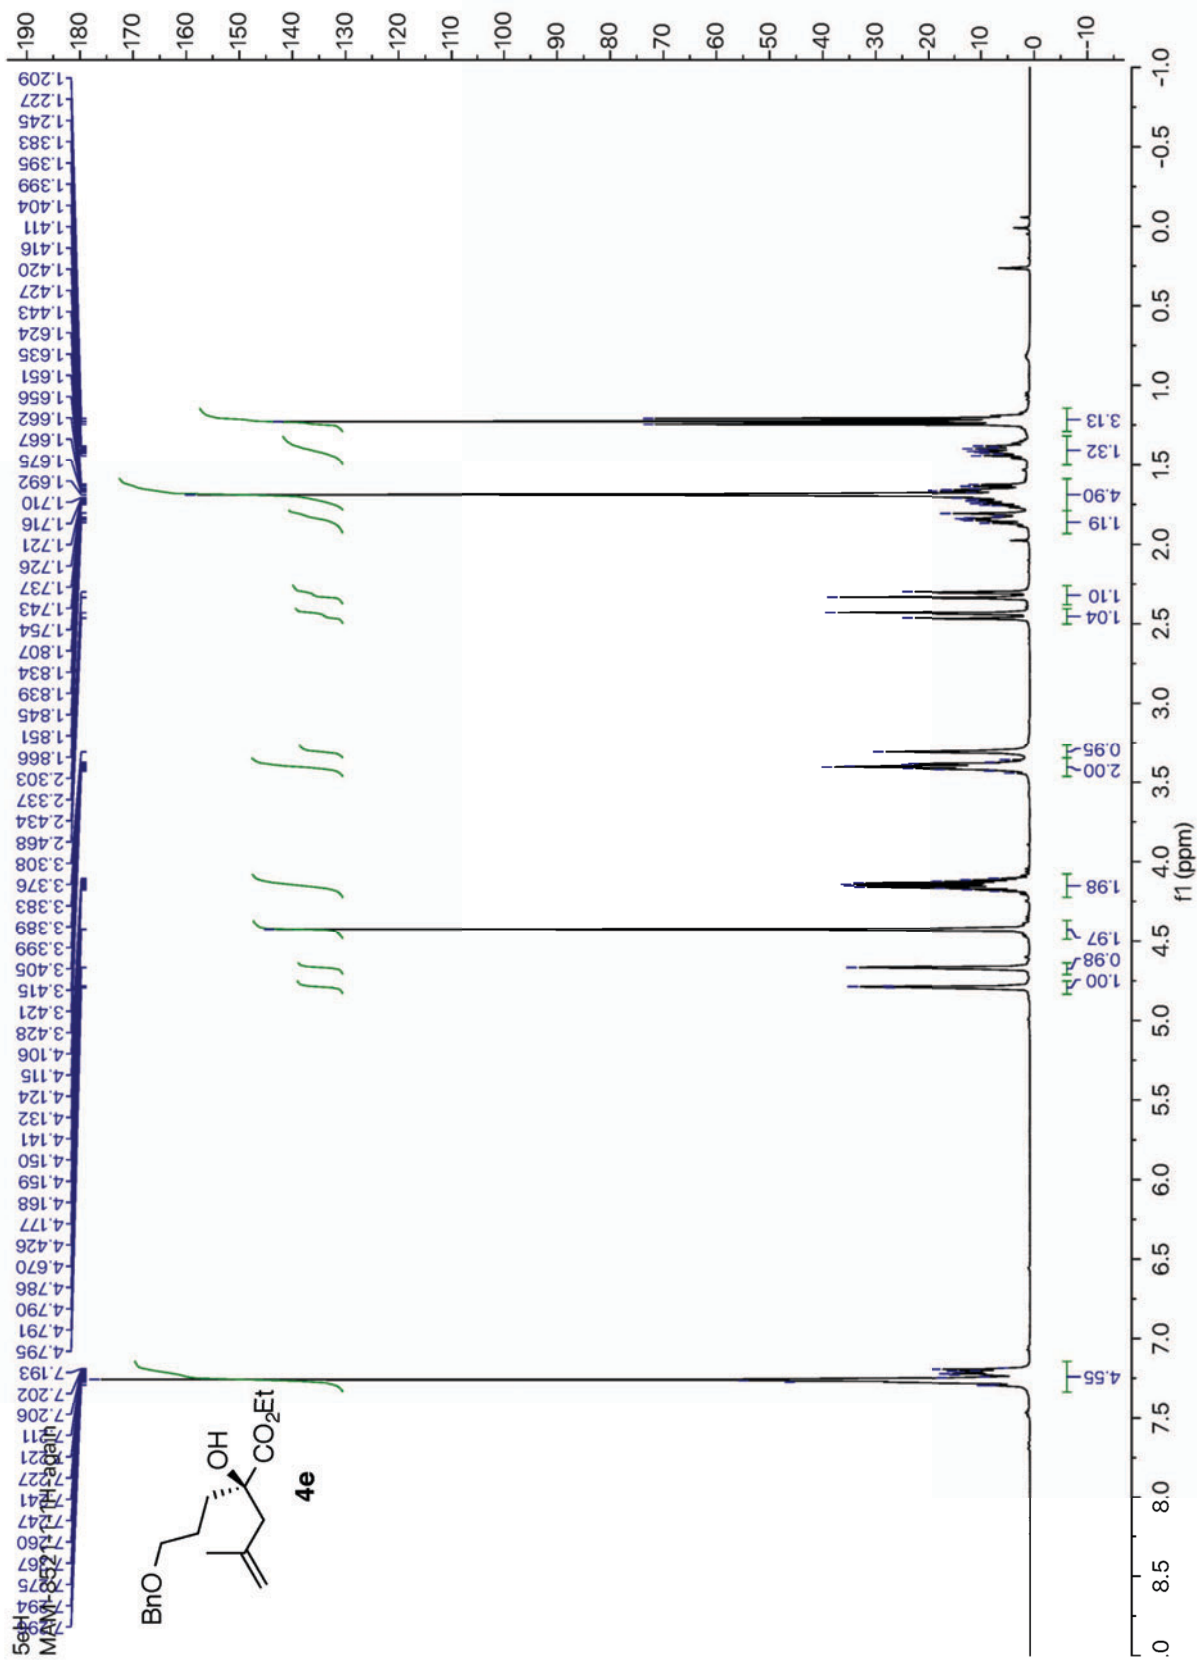

<sup>1</sup>H NMR spectra of compound 4e (400 MHz, CDCl<sub>3</sub>)

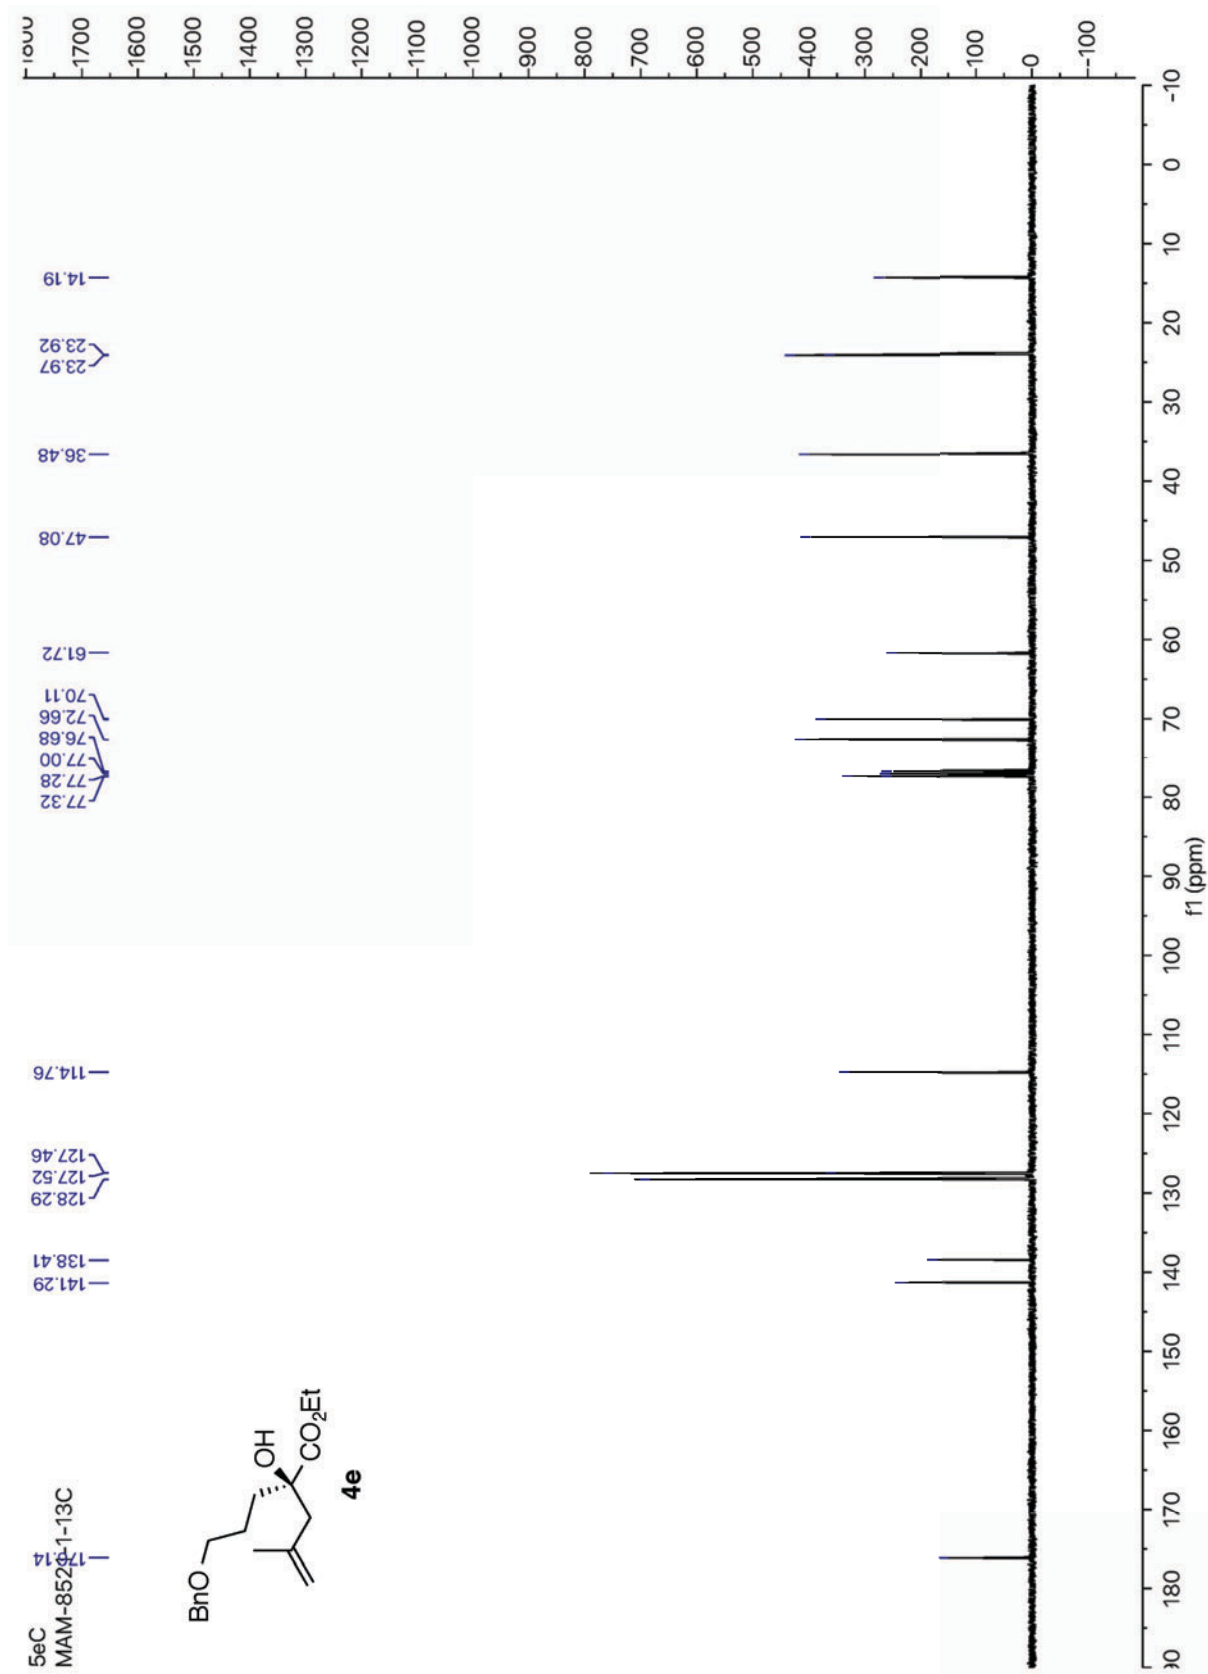

<sup>13</sup>C NMR spectra of compound **4e** (100 MHz, CDCl<sub>3</sub>)

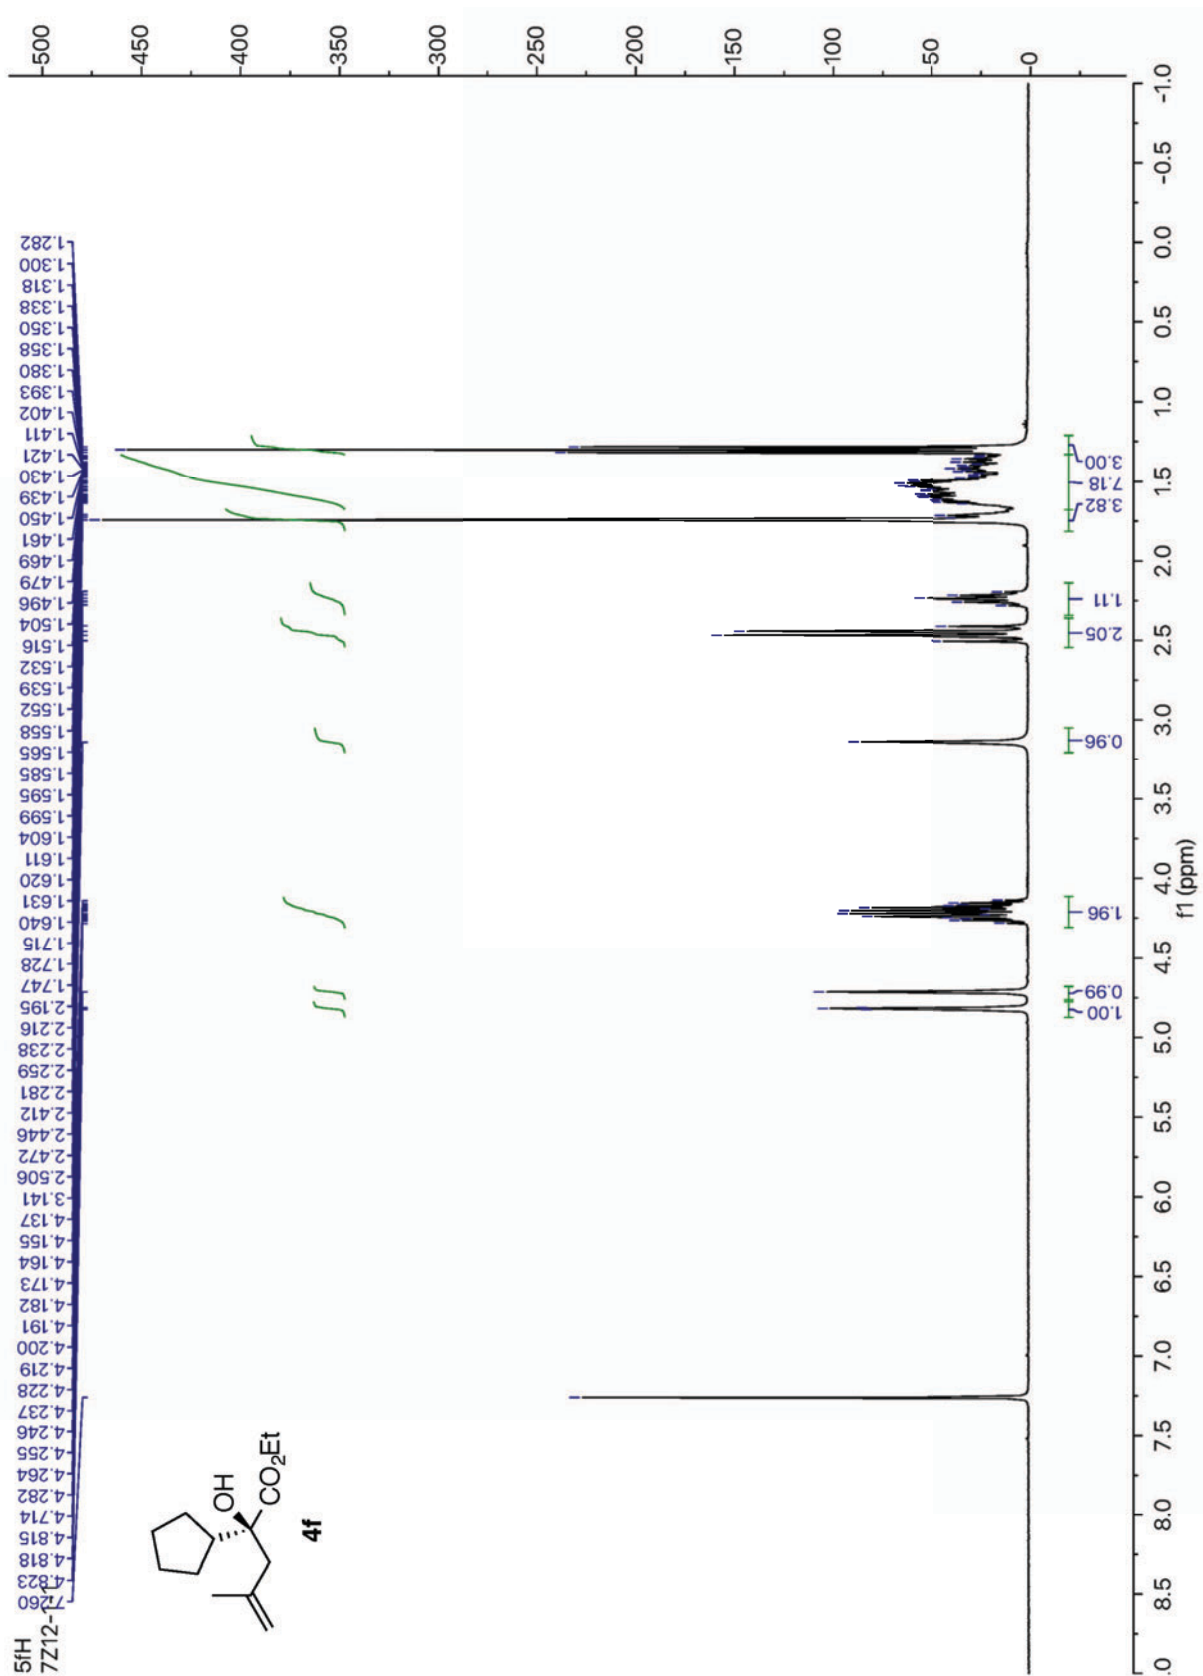

<sup>1</sup>H NMR spectra of compound **4f** (400 MHz, CDCl<sub>3</sub>)

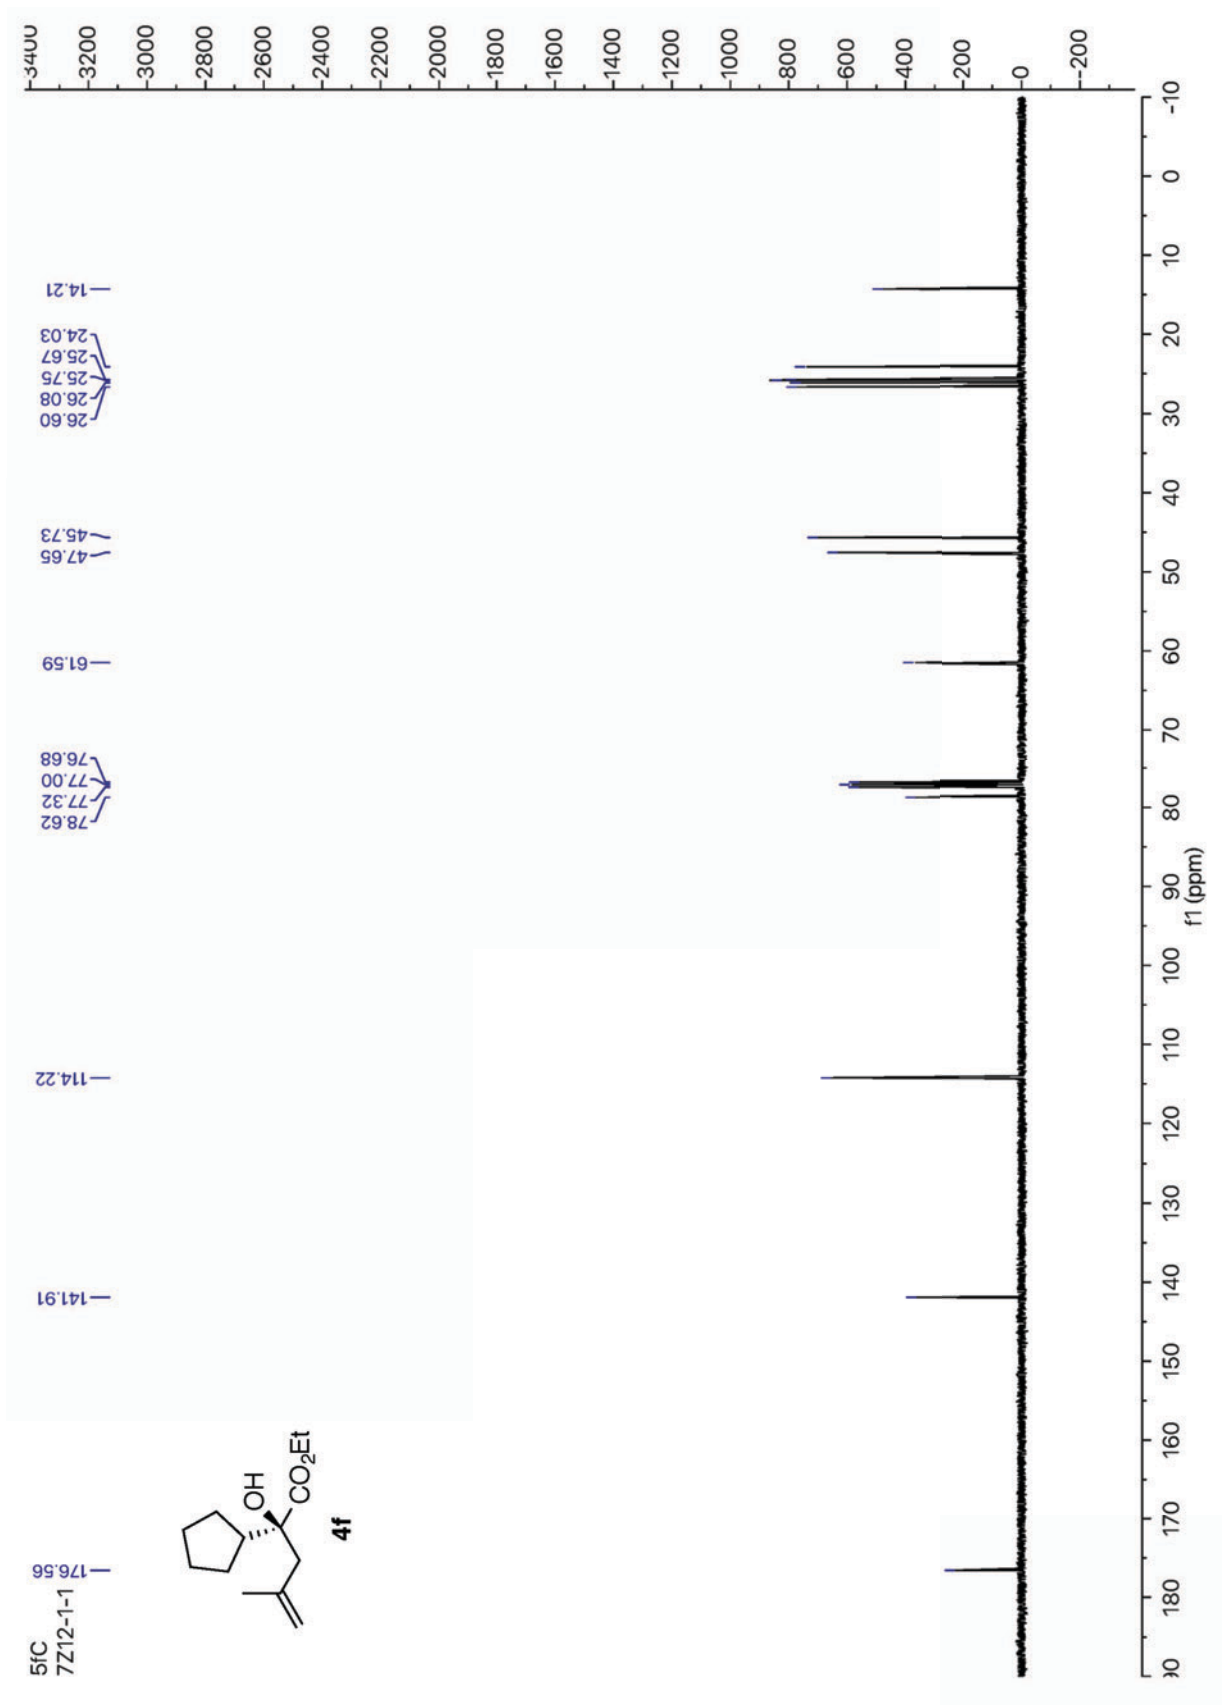

<sup>13</sup>C NMR spectra of compound **4f** (100 MHz, CDCl<sub>3</sub>)



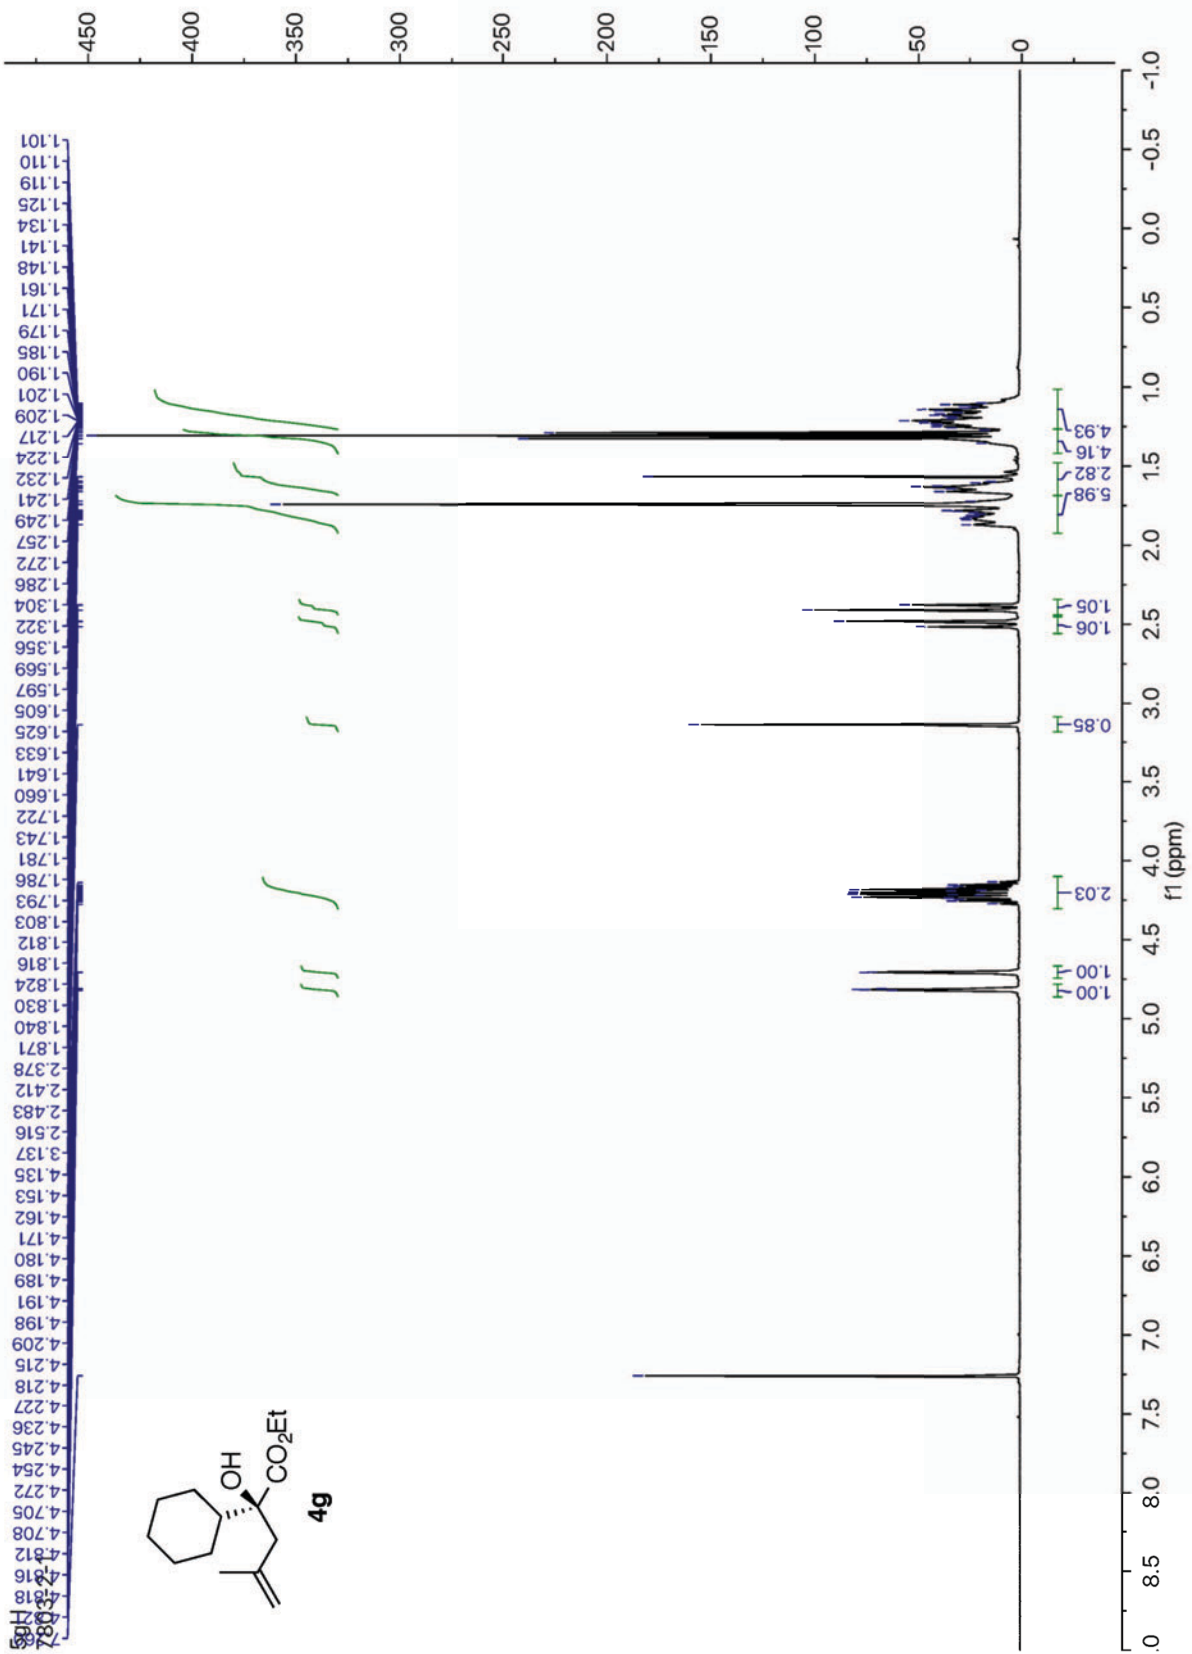

<sup>1</sup>H NMR spectra of compound 4g (400 MHz, CDCl<sub>3</sub>)

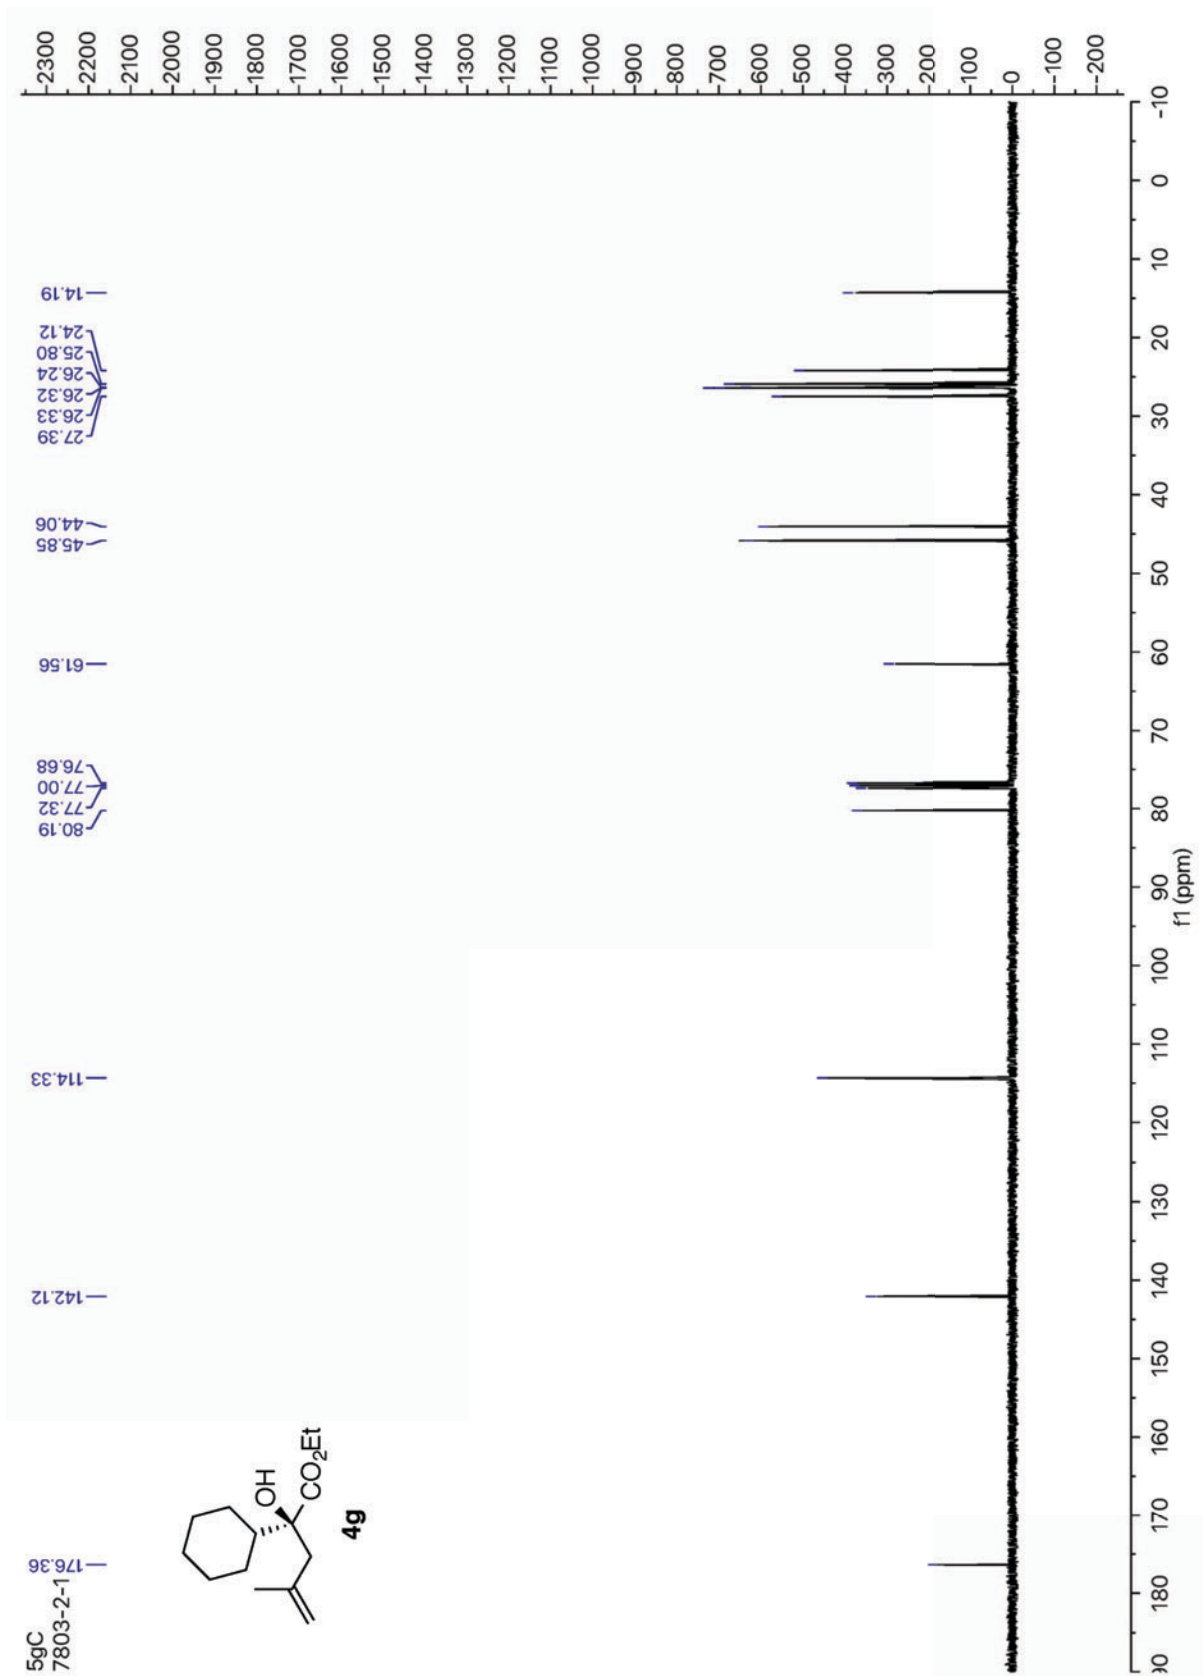

<sup>13</sup>C NMR spectra of compound **4g** (100 MHz, CDCl<sub>3</sub>)

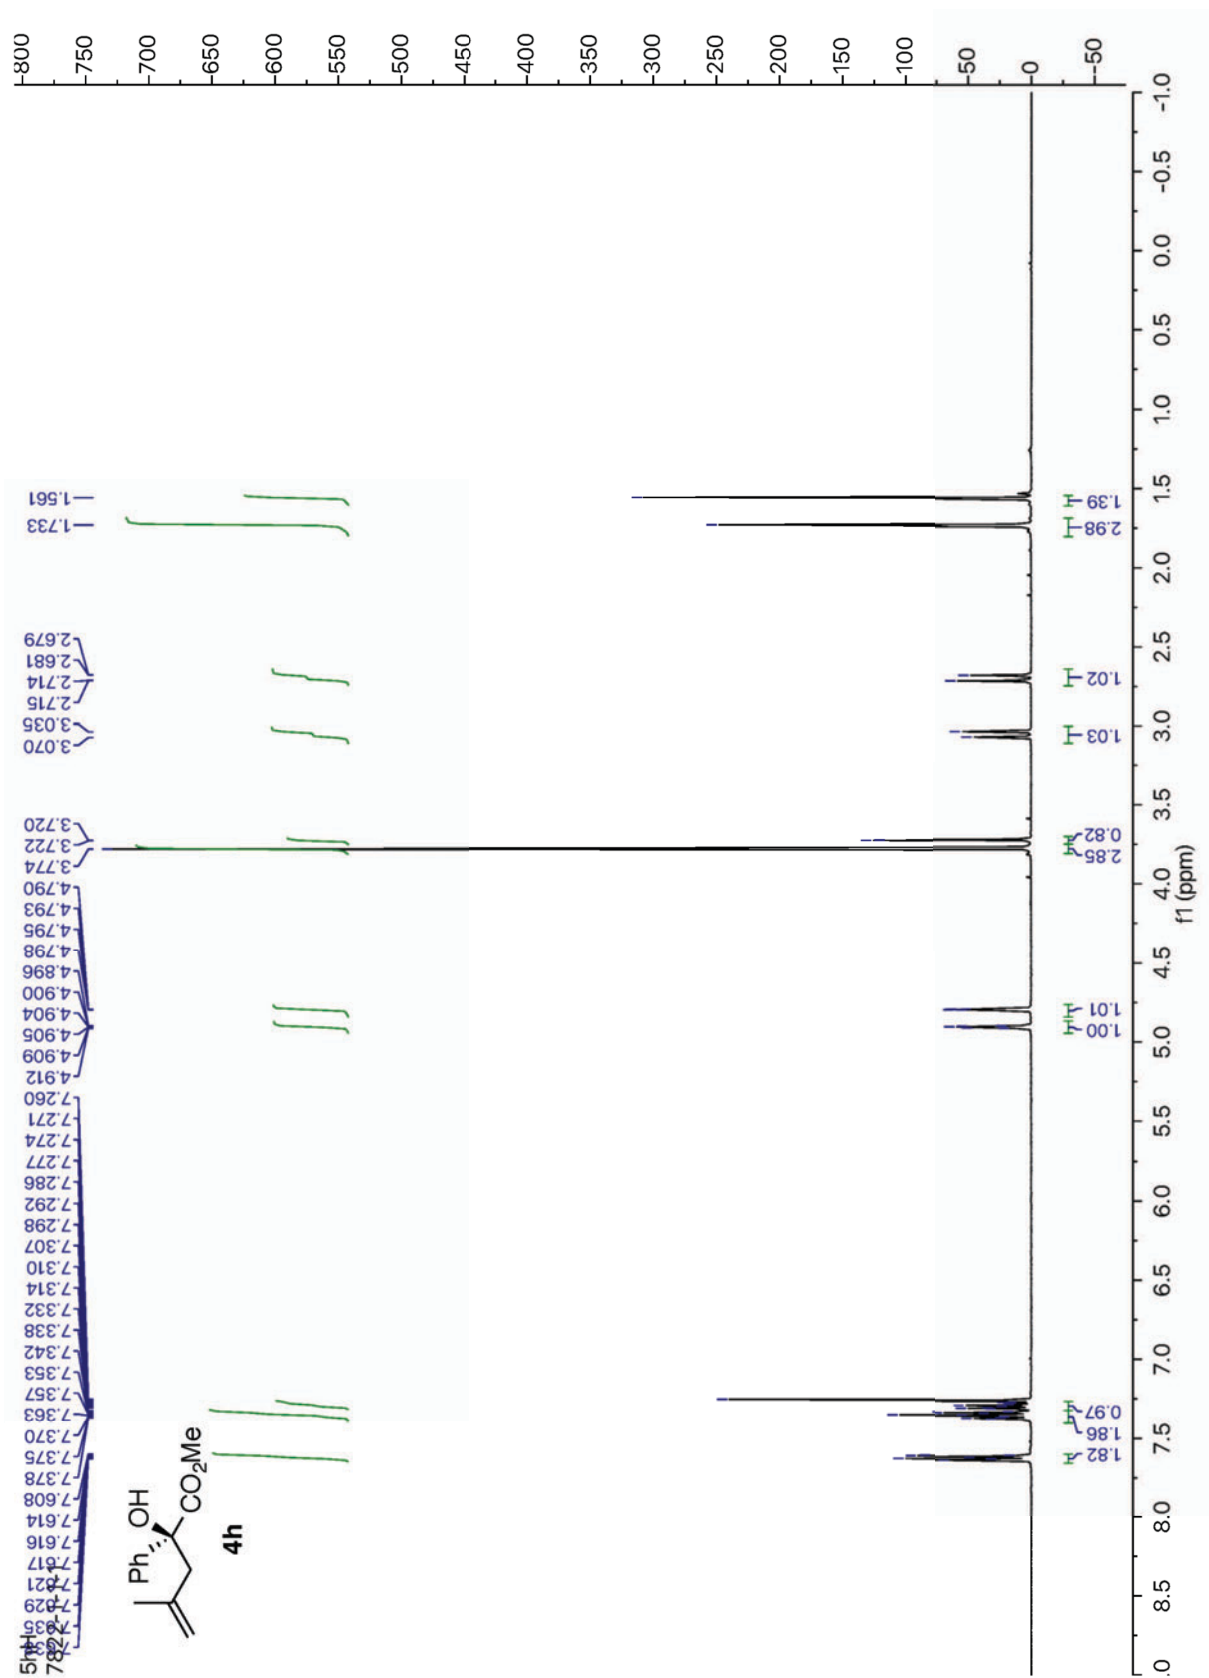

<sup>1</sup>H NMR spectra of compound **4h** (400 MHz, CDCl<sub>3</sub>)

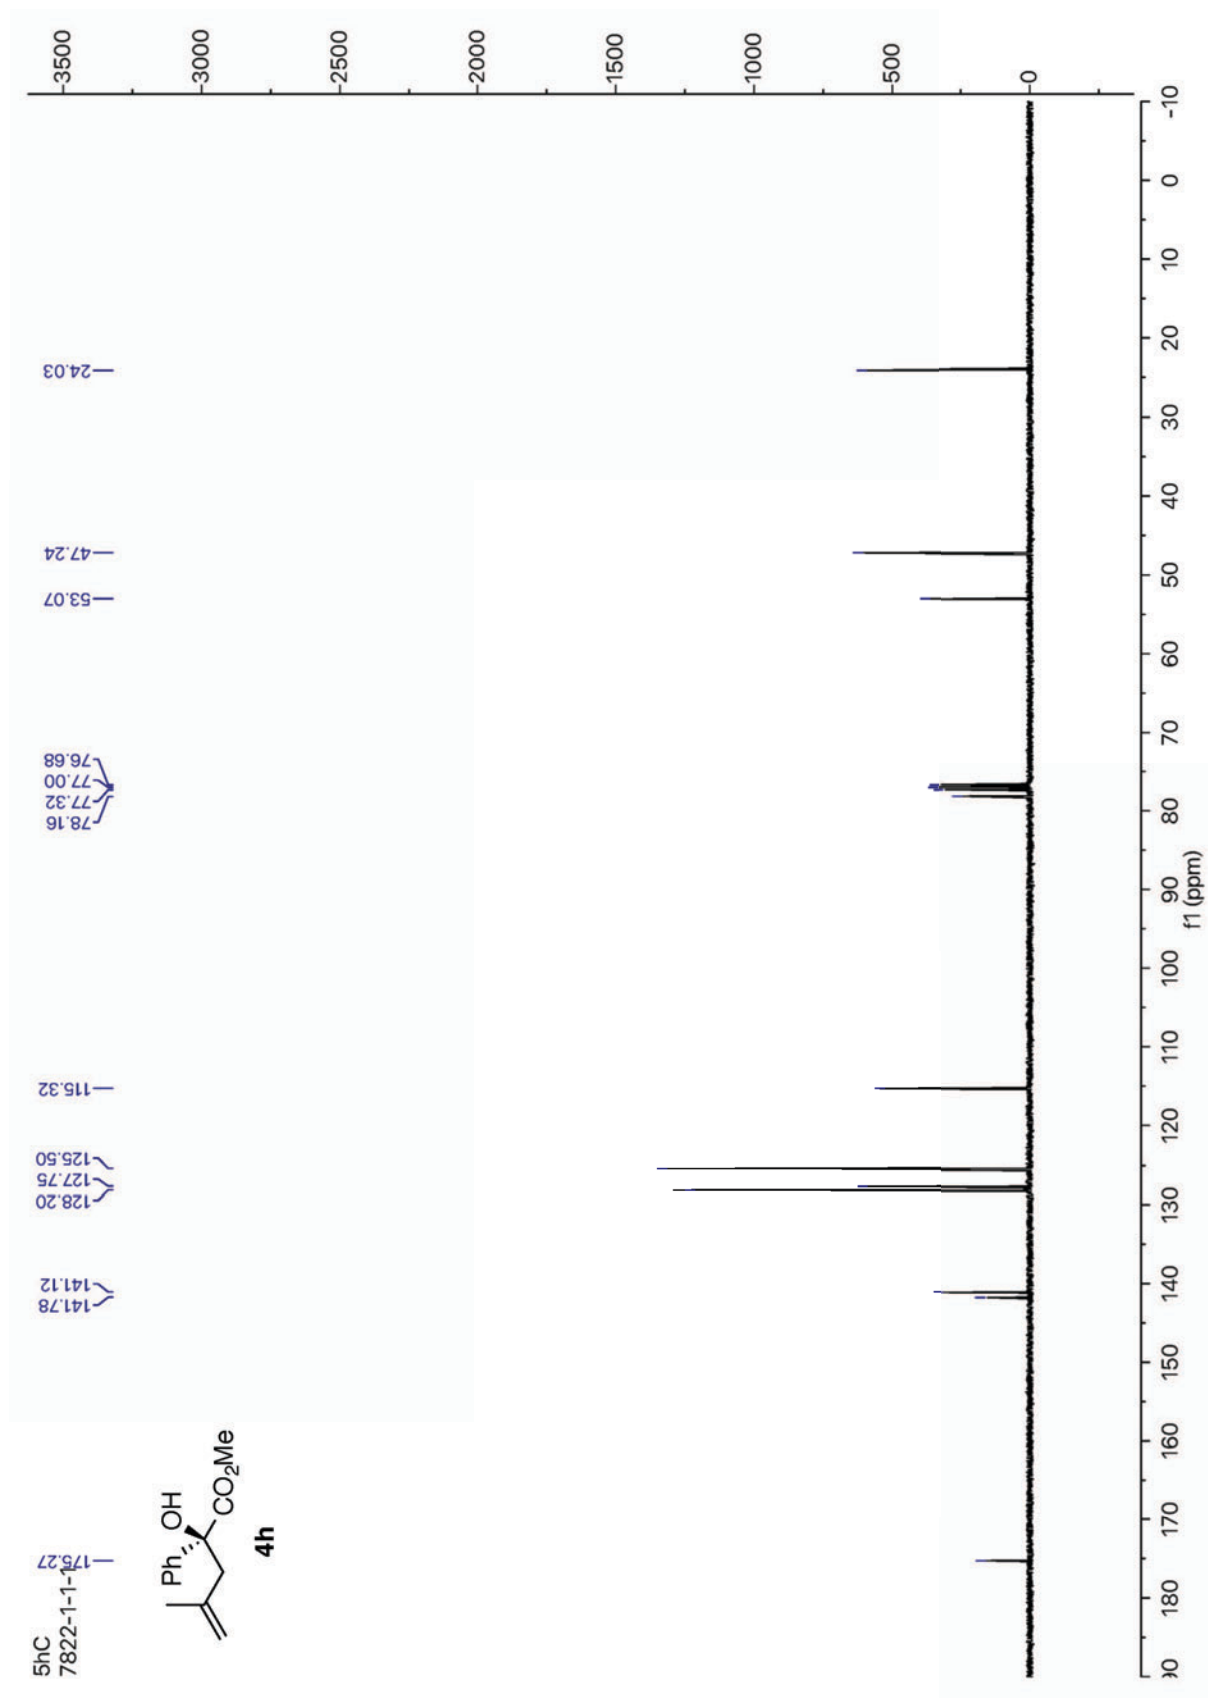

<sup>13</sup>C NMR spectra of compound **4h** (100 MHz, CDCl<sub>3</sub>)

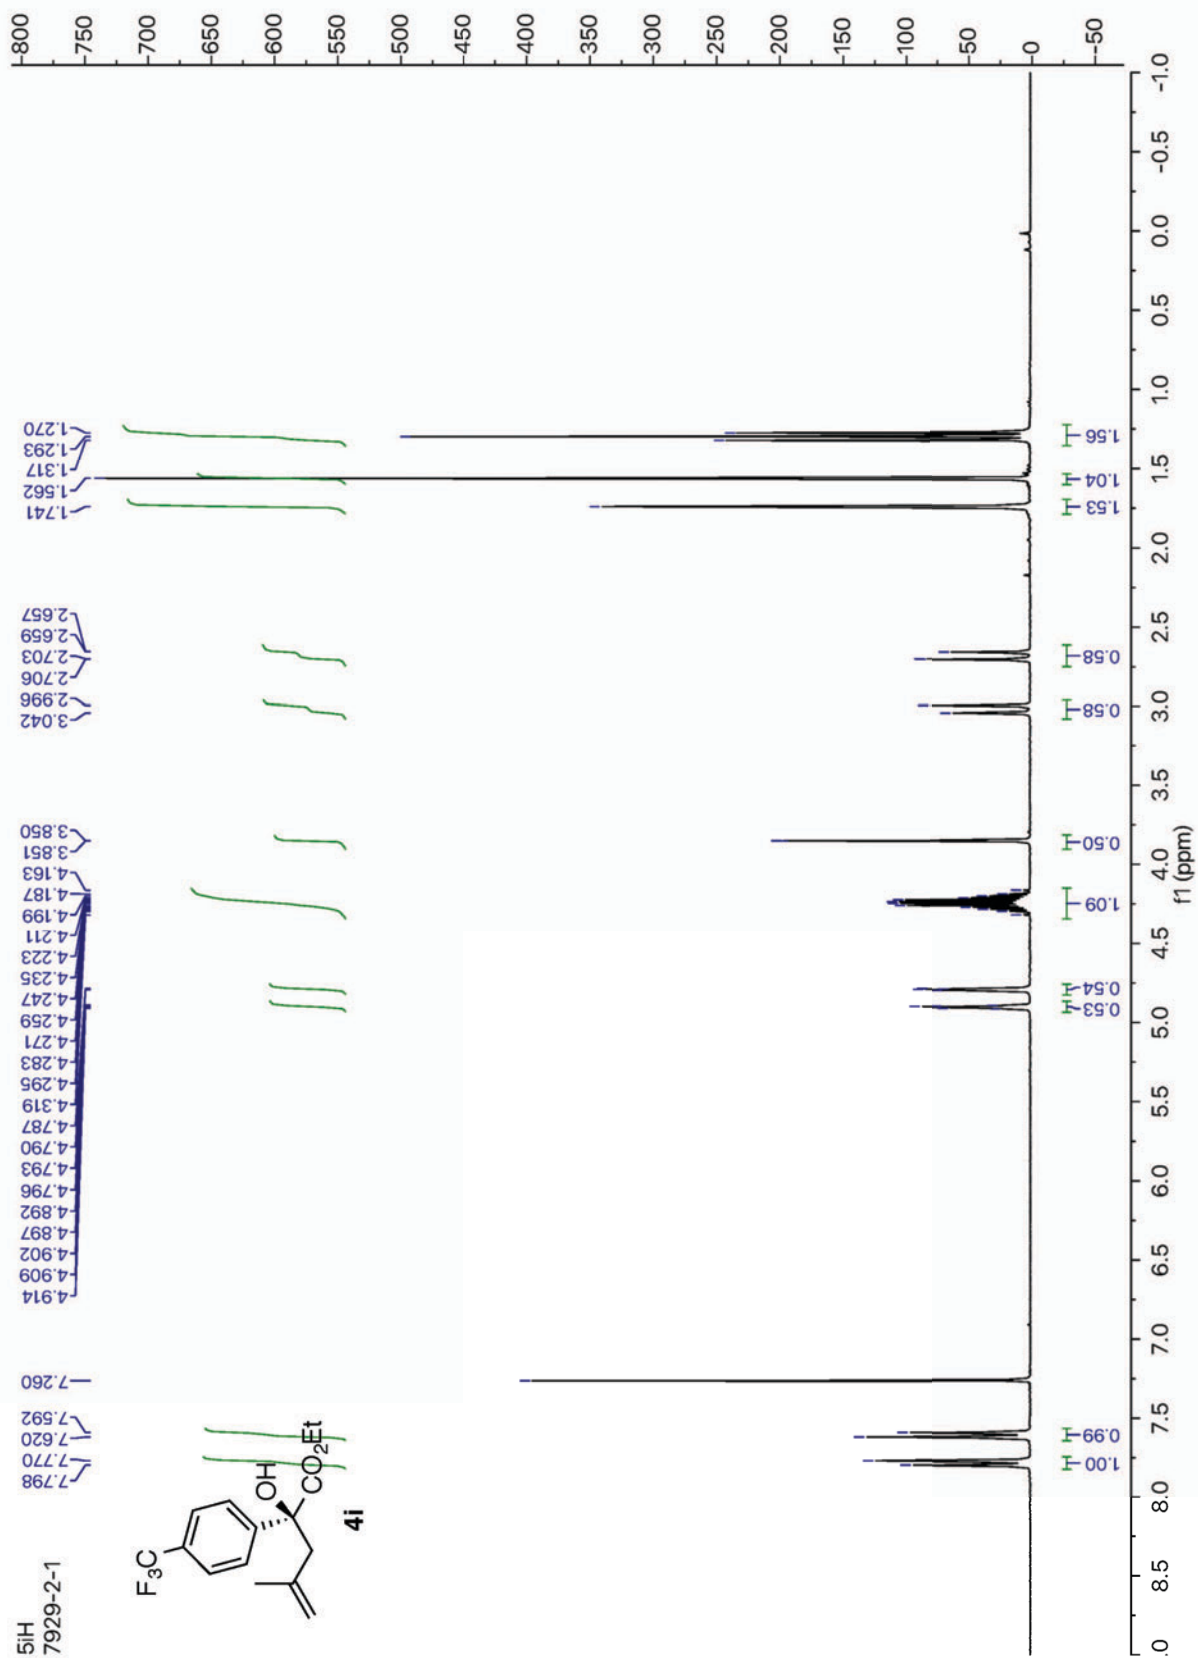

<sup>1</sup>H NMR spectra of compound **4i** (300 MHz, CDCl<sub>3</sub>)

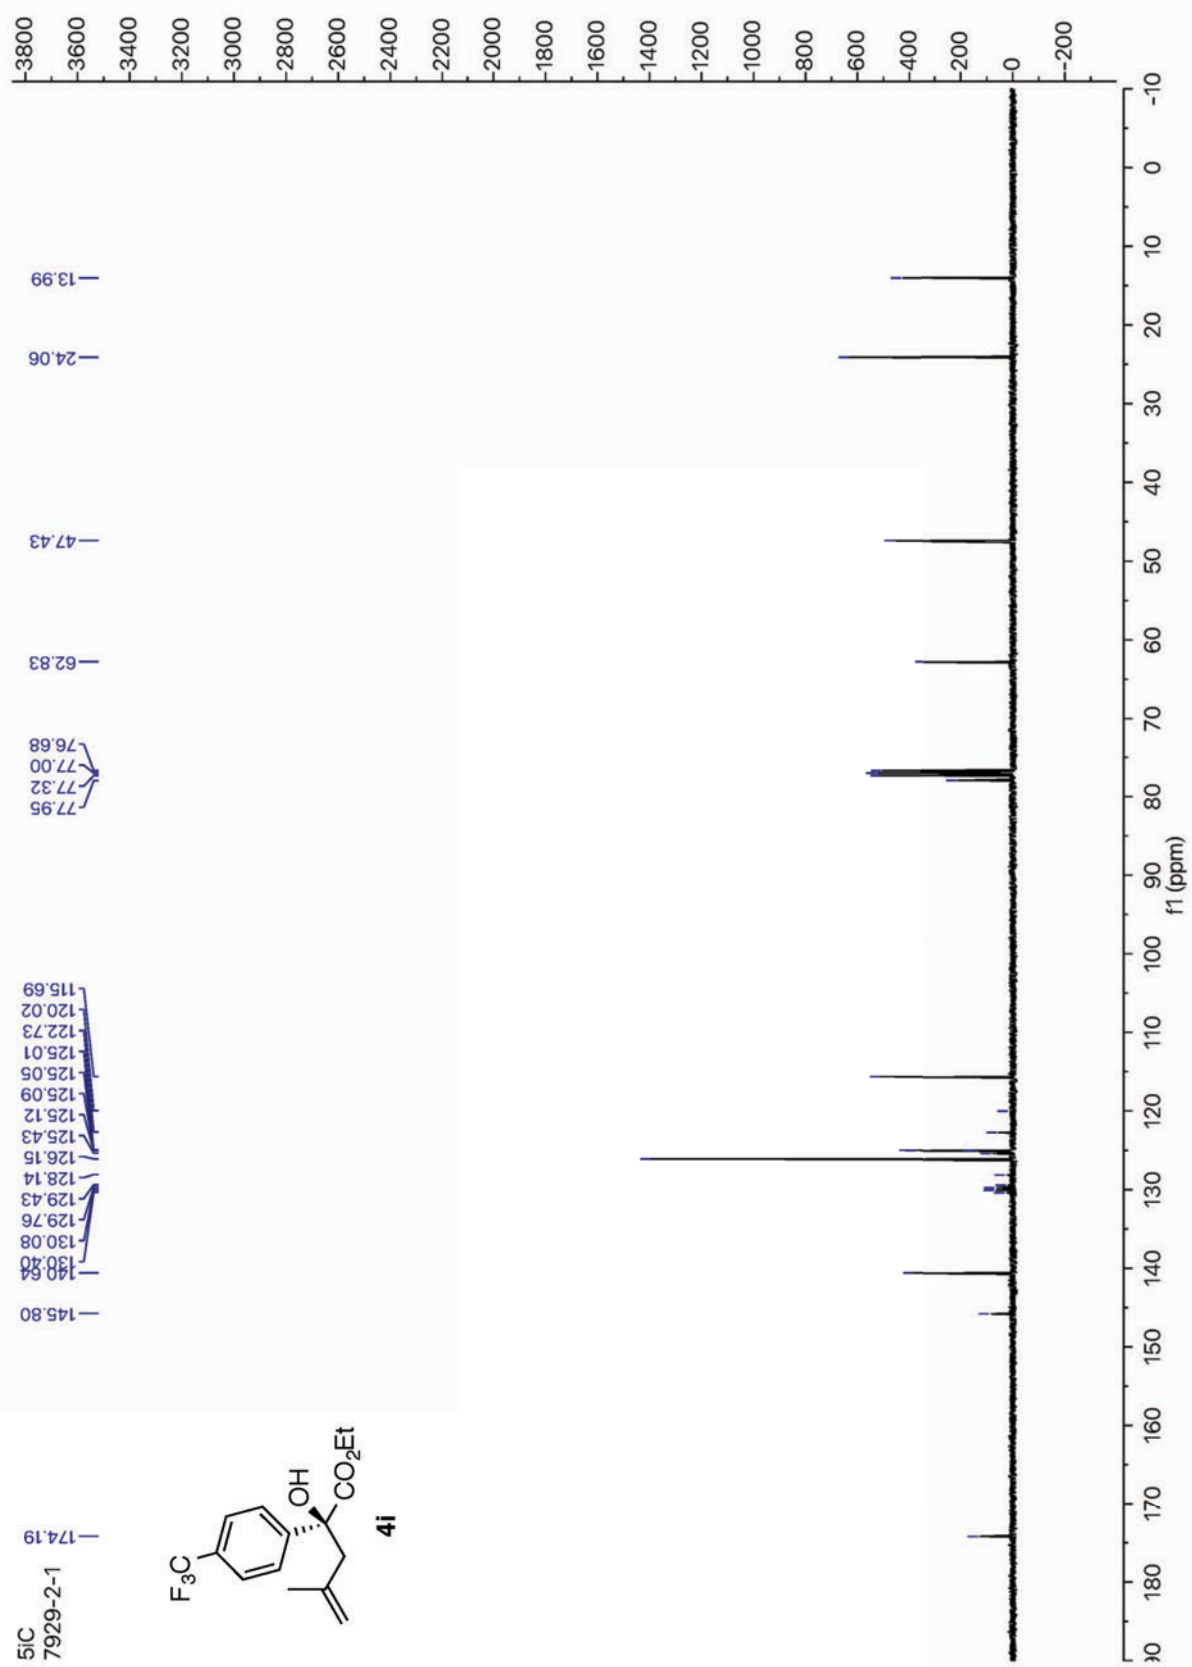

<sup>13</sup>C NMR spectra of compound **4i** (100 MHz, CDCl<sub>3</sub>)

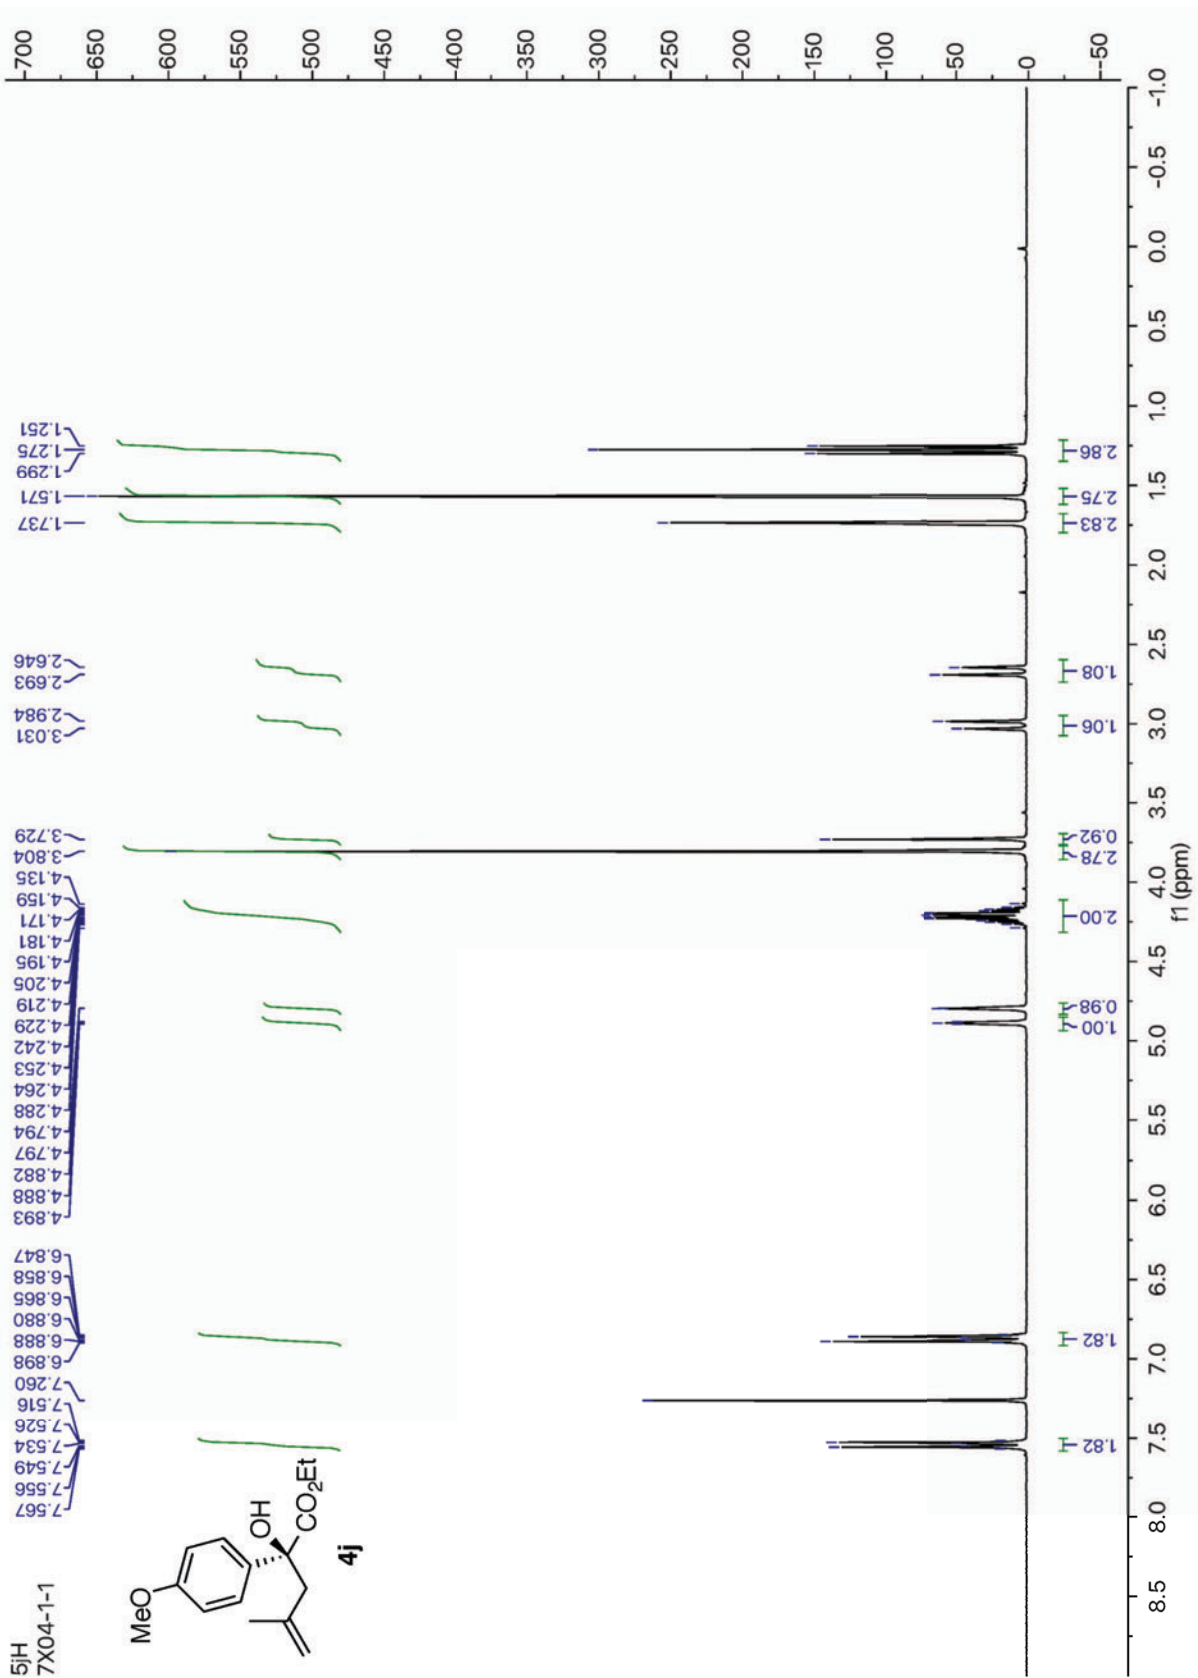

<sup>1</sup>H NMR spectra of compound **4j** (300 MHz, CDCl<sub>3</sub>)

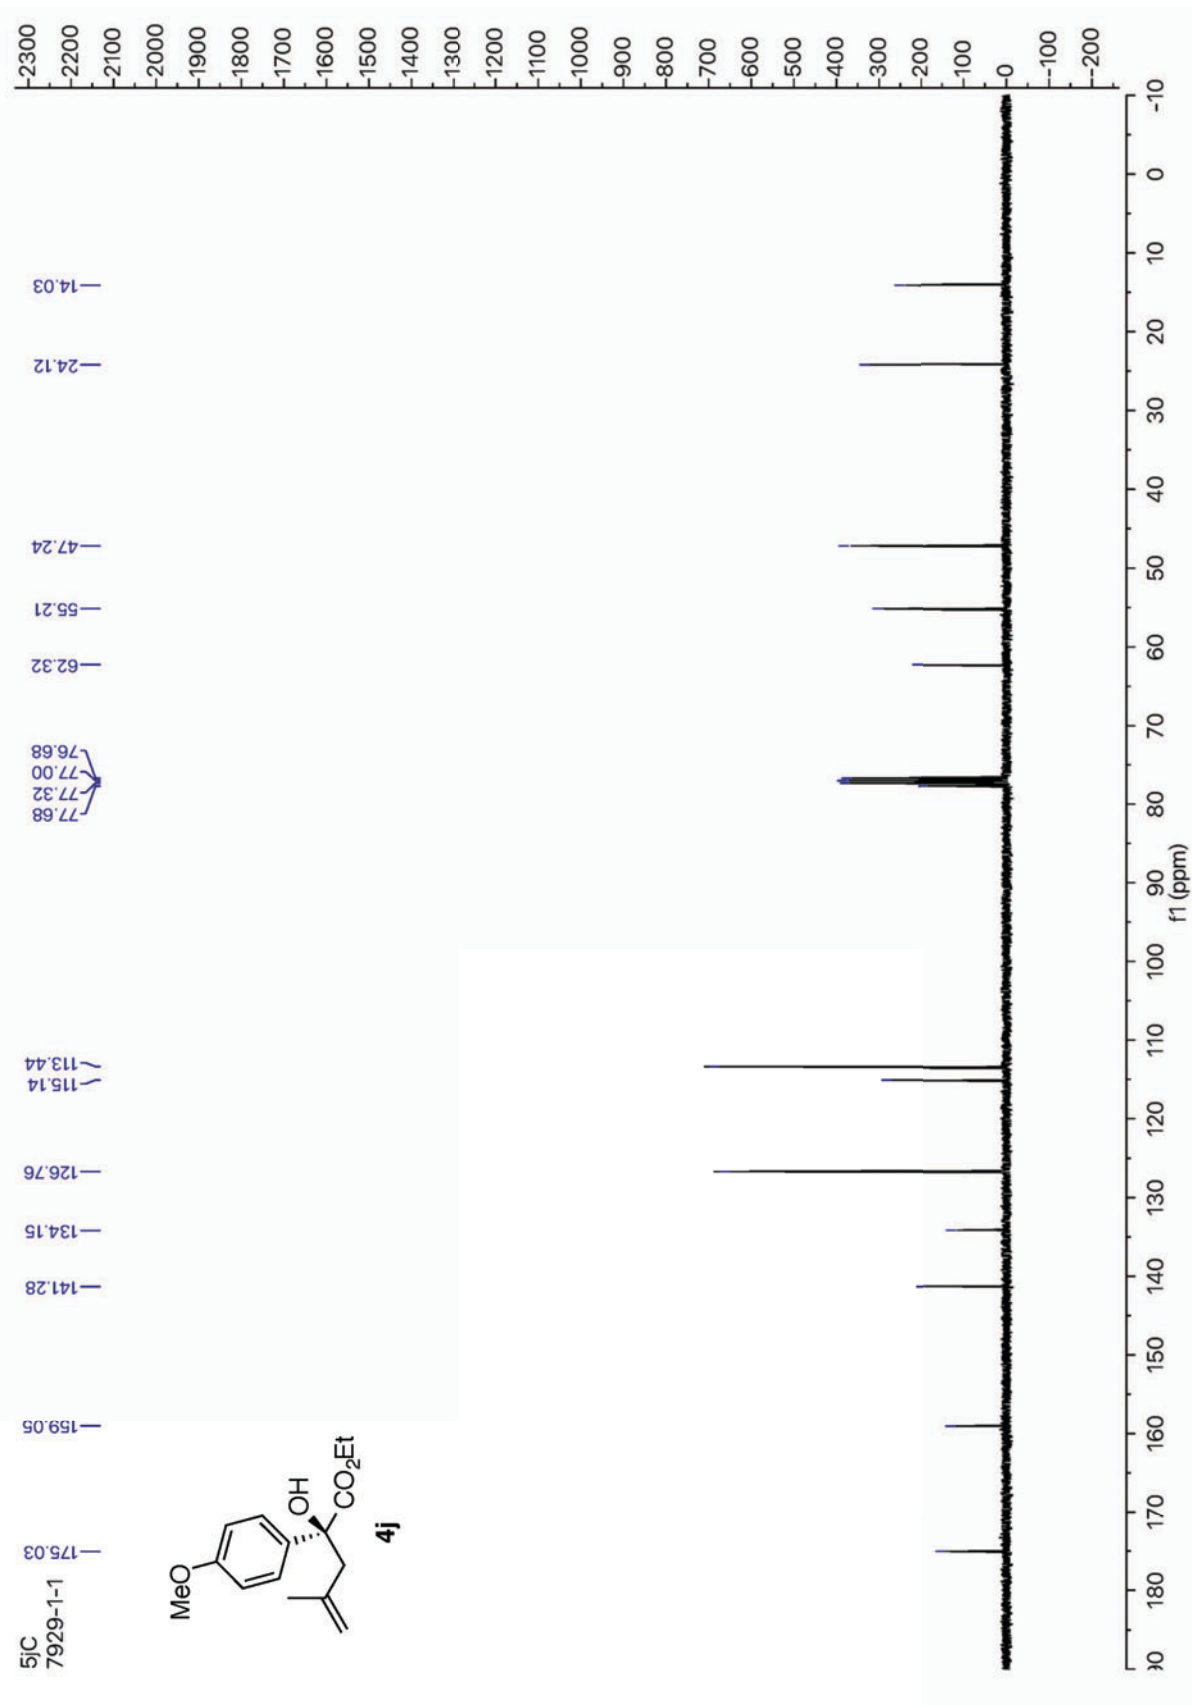

<sup>13</sup>C NMR spectra of compound **4j** (100 MHz, CDCl<sub>3</sub>)



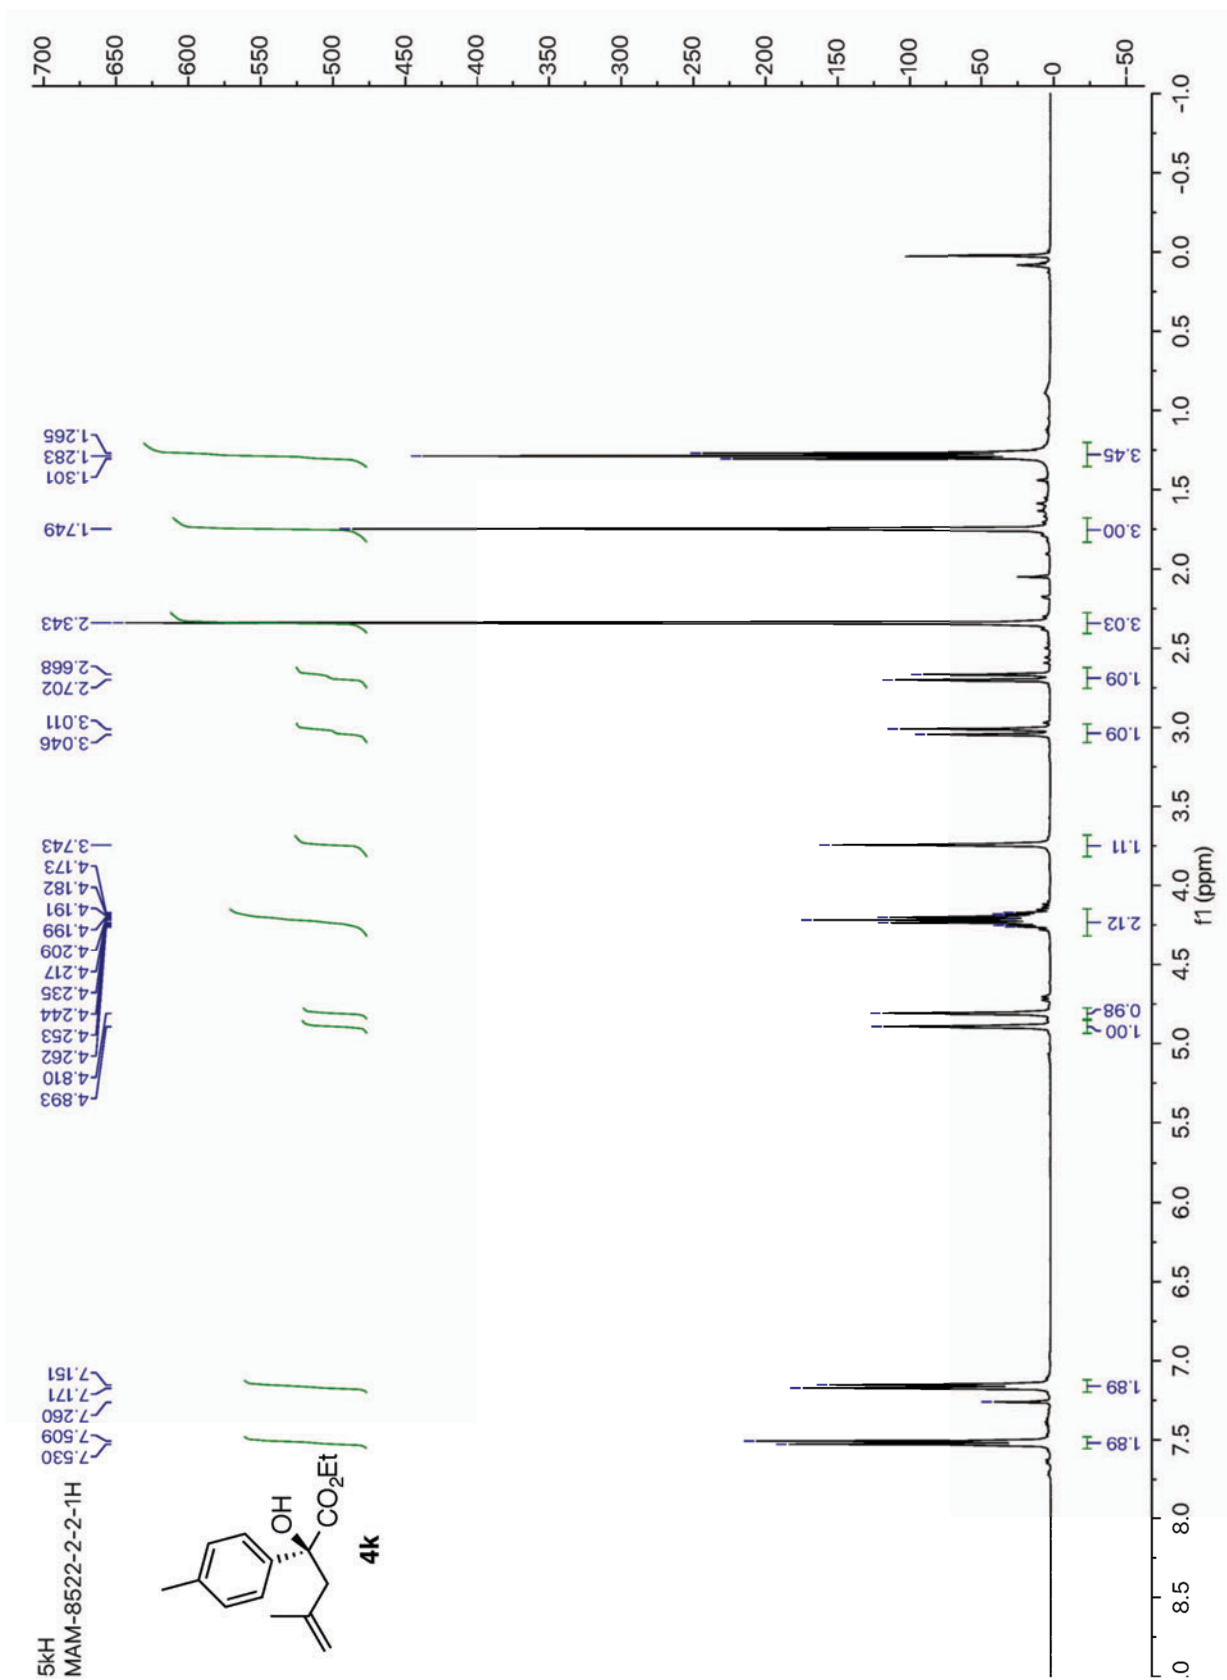

<sup>1</sup>H NMR spectra of compound **4k** (400 MHz, CDCl<sub>3</sub>)

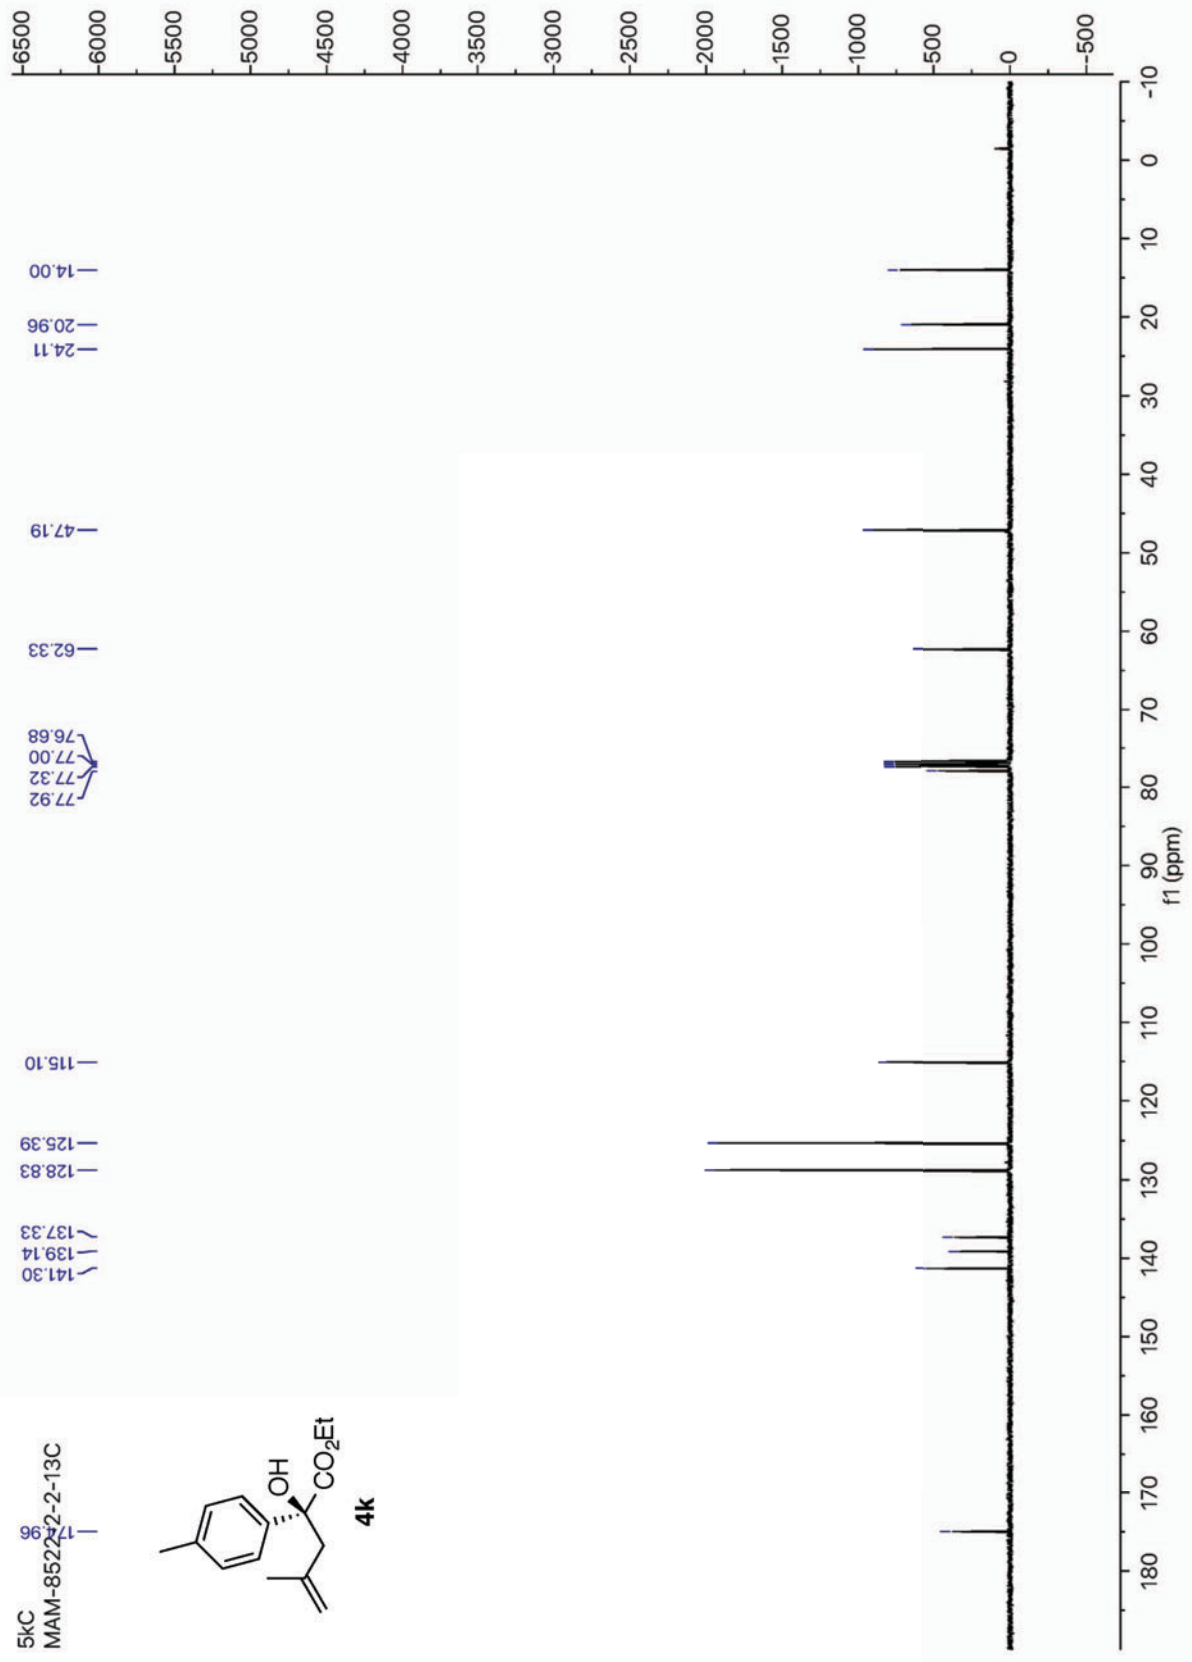

<sup>13</sup>C NMR spectra of compound **4k** (100 MHz, CDCl<sub>3</sub>)

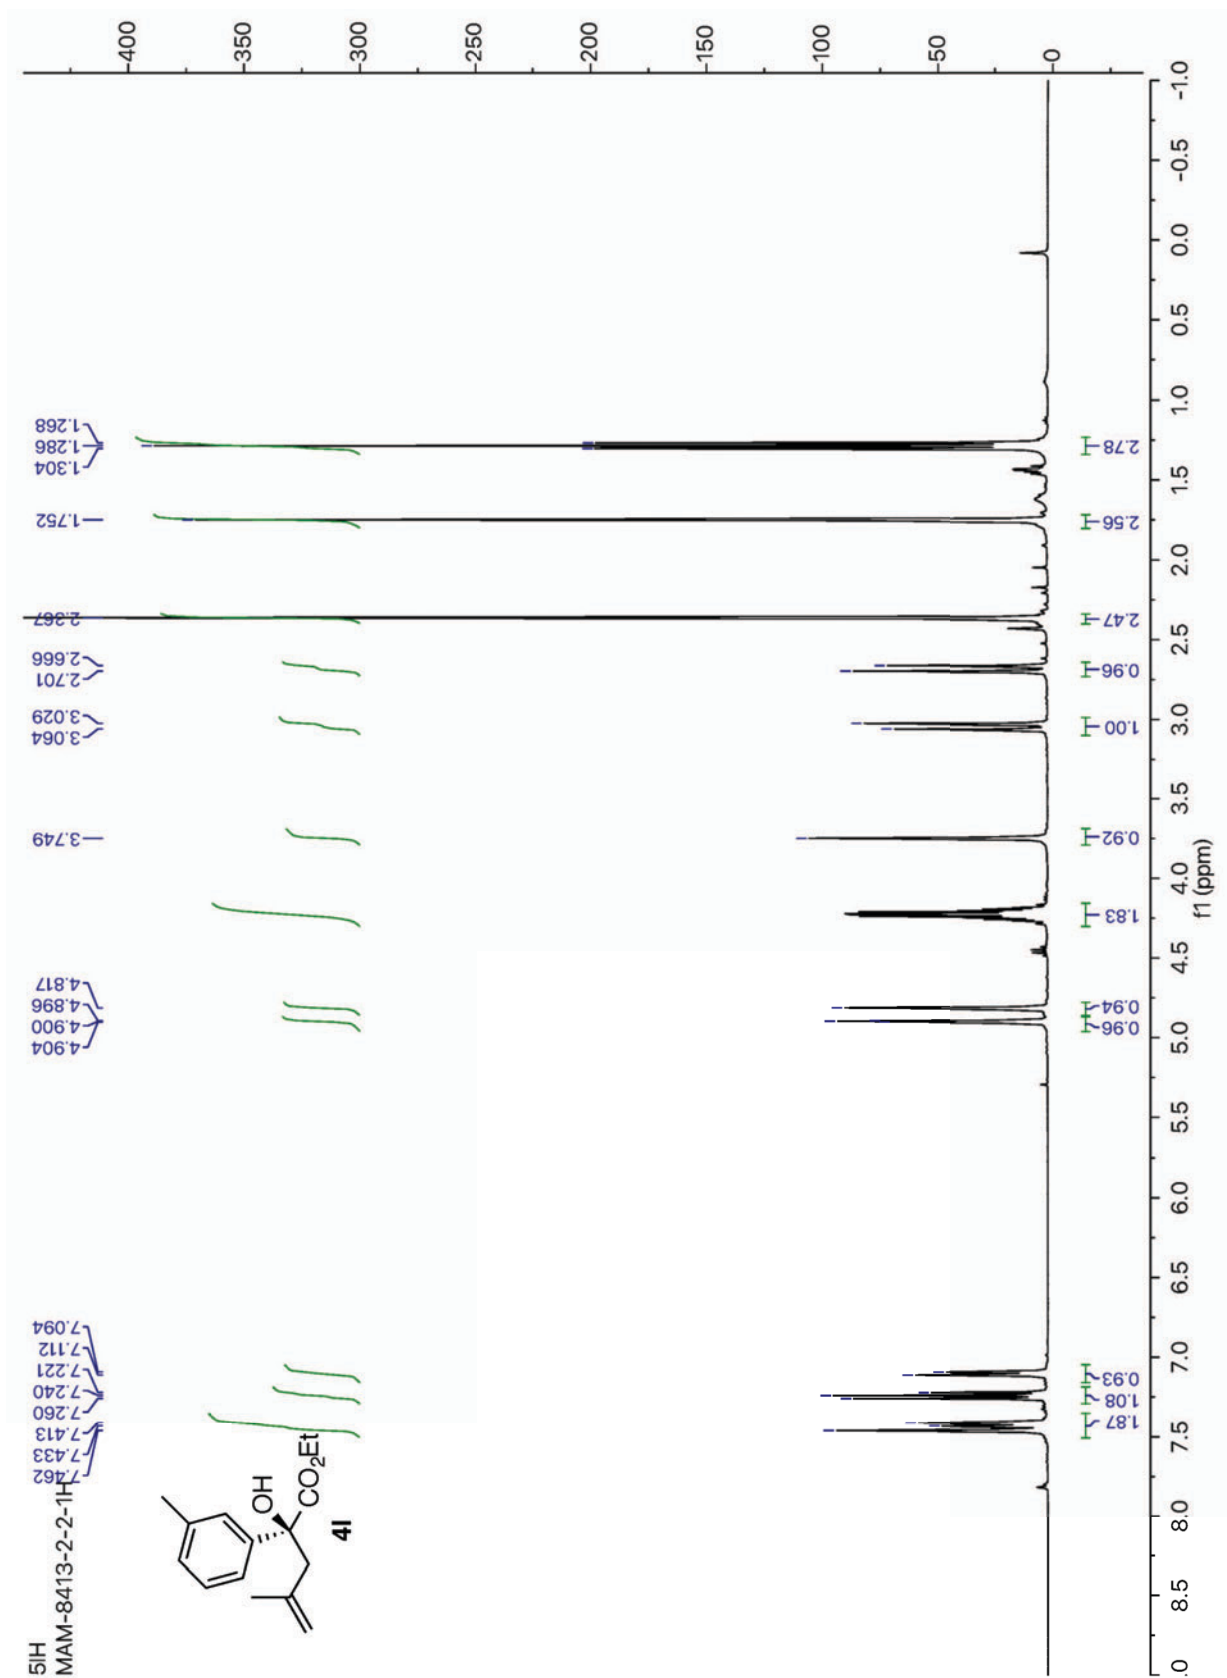

<sup>1</sup>H NMR spectra of compound **4I** (400 MHz, CDCl<sub>3</sub>)

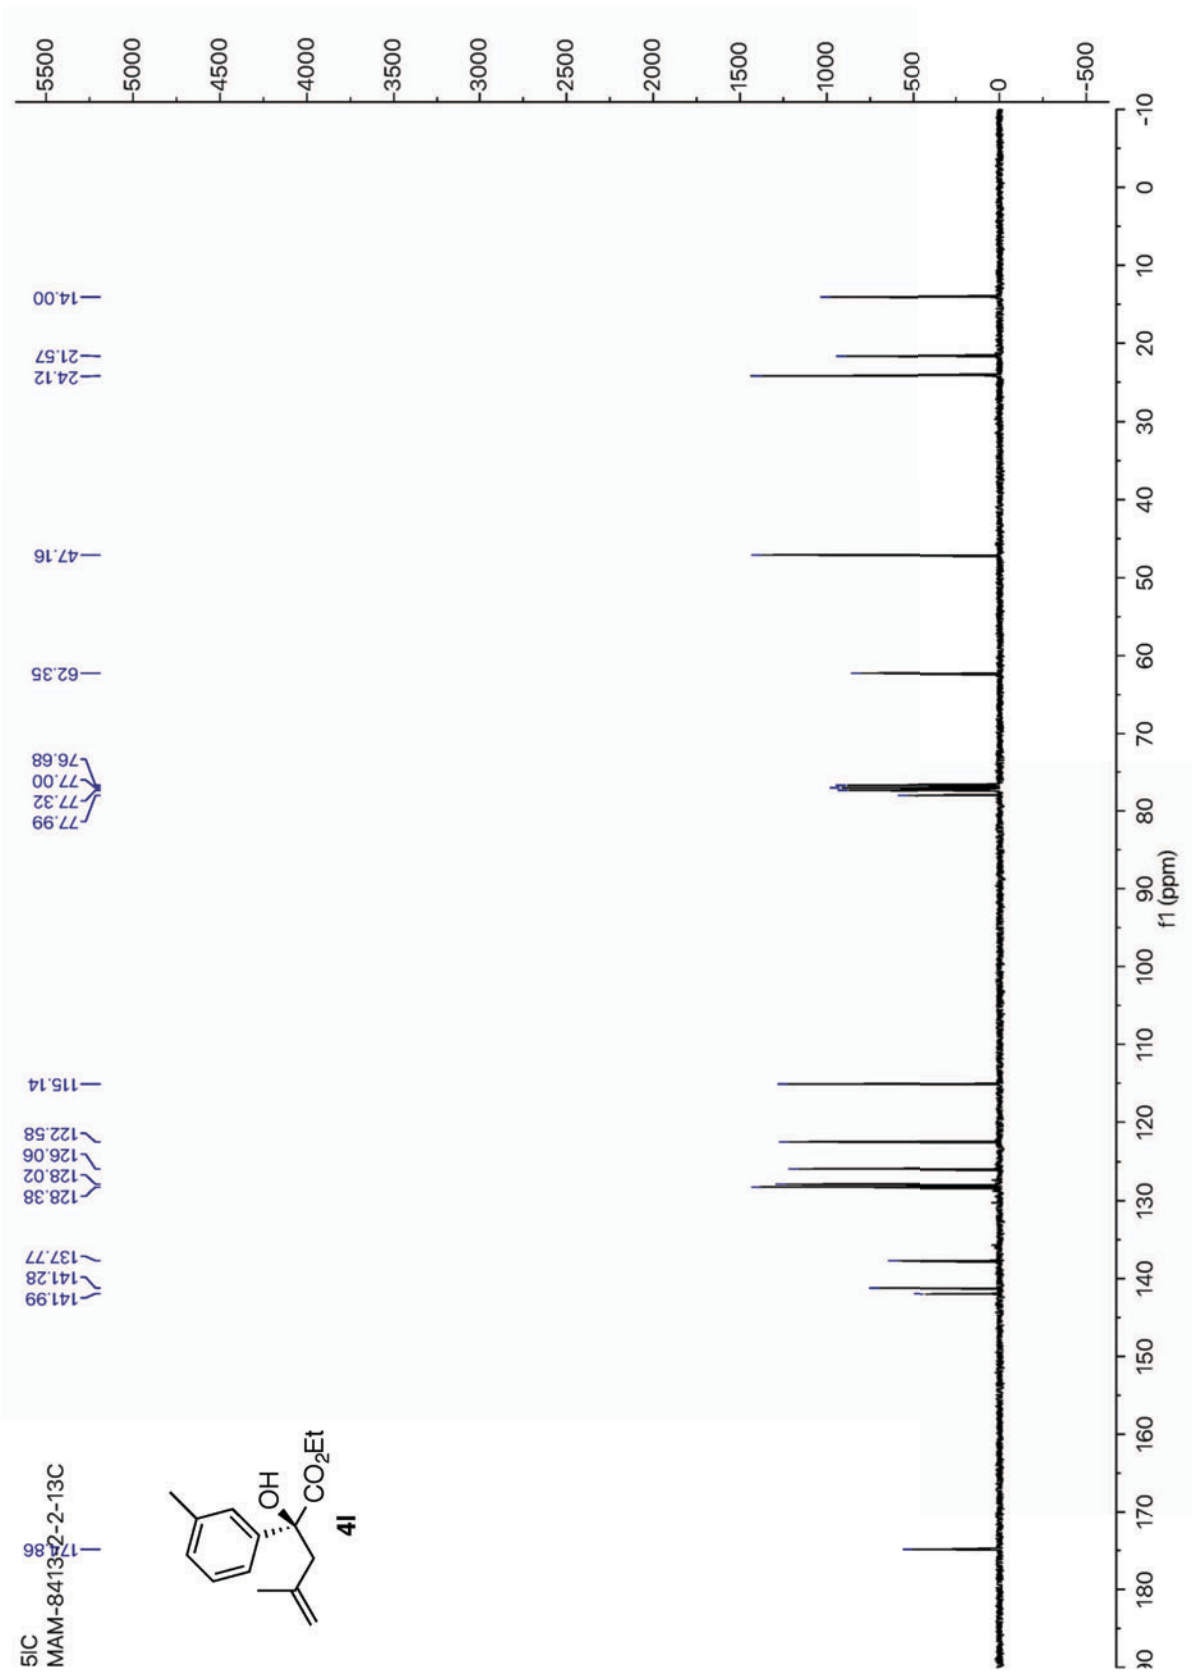

$^{13}\text{C}$  NMR spectra of compound **4I** (100 MHz,  $\text{CDCl}_3$ )

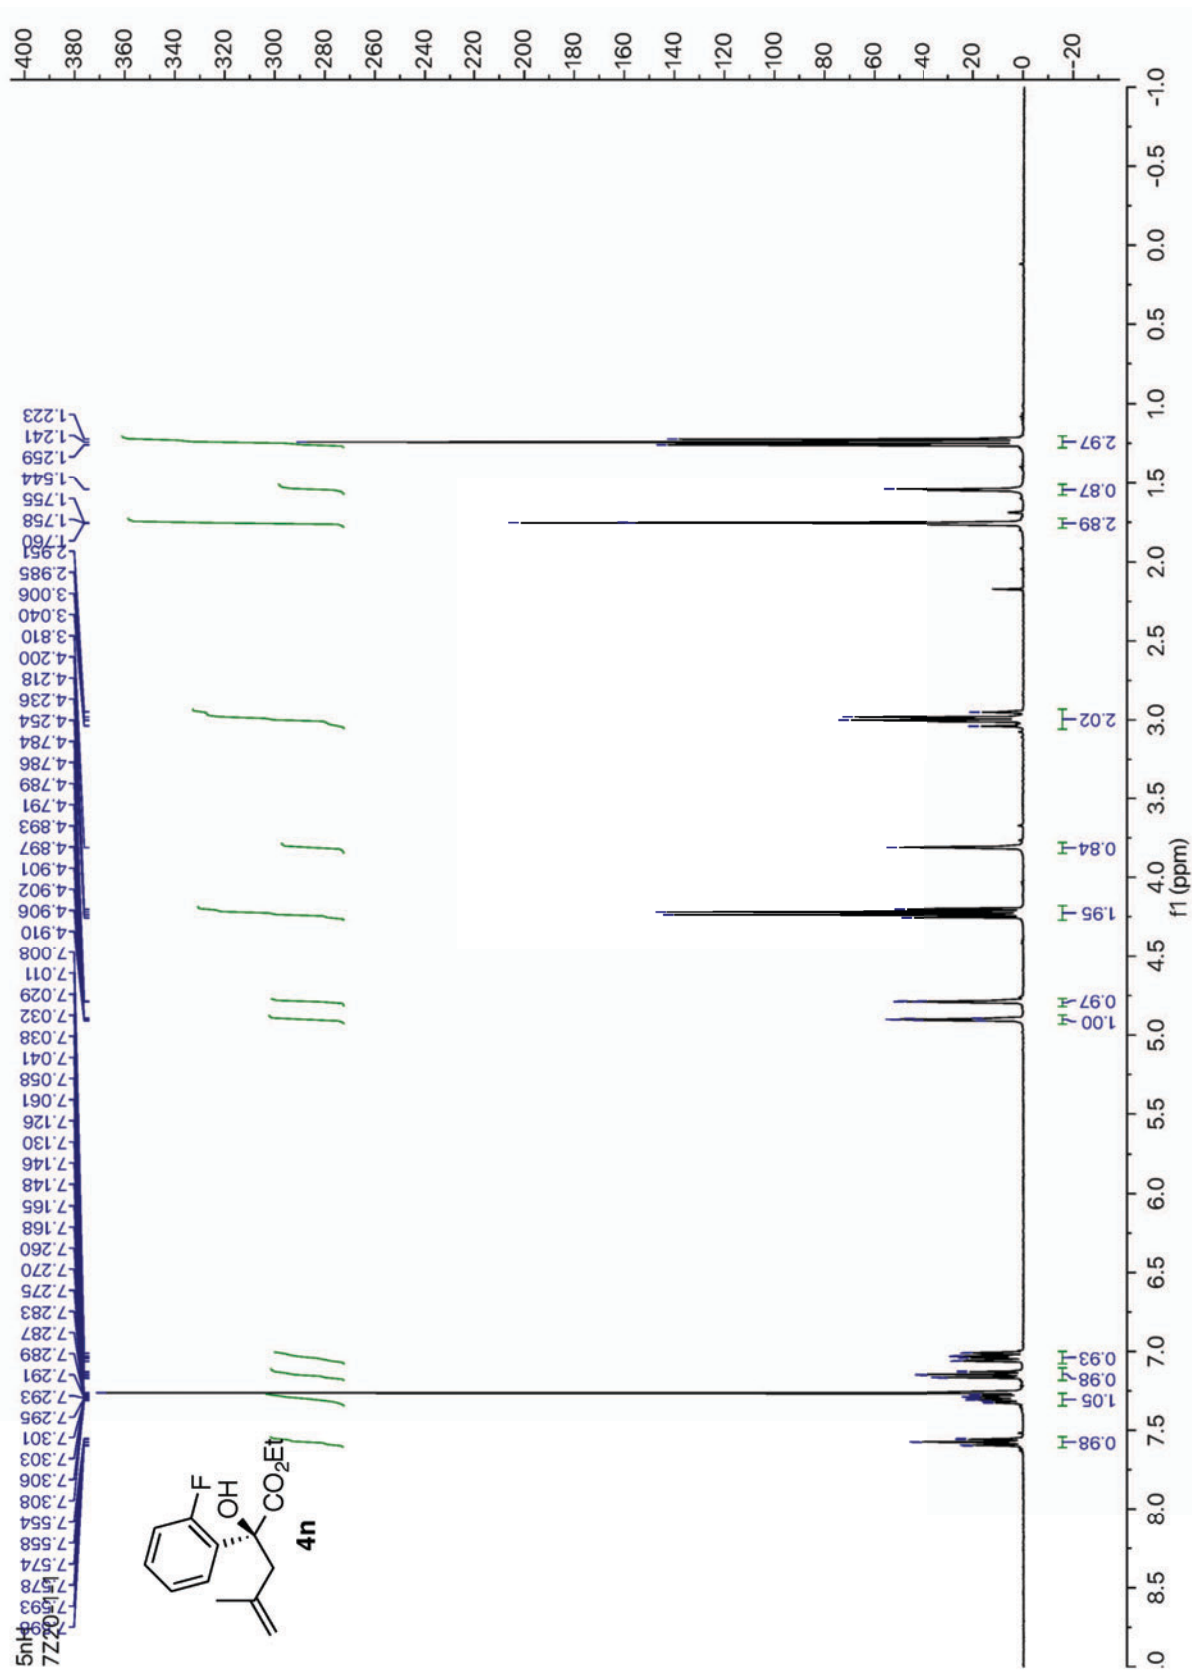

<sup>1</sup>H NMR spectra of compound **4n** (400 MHz, CDCl<sub>3</sub>)

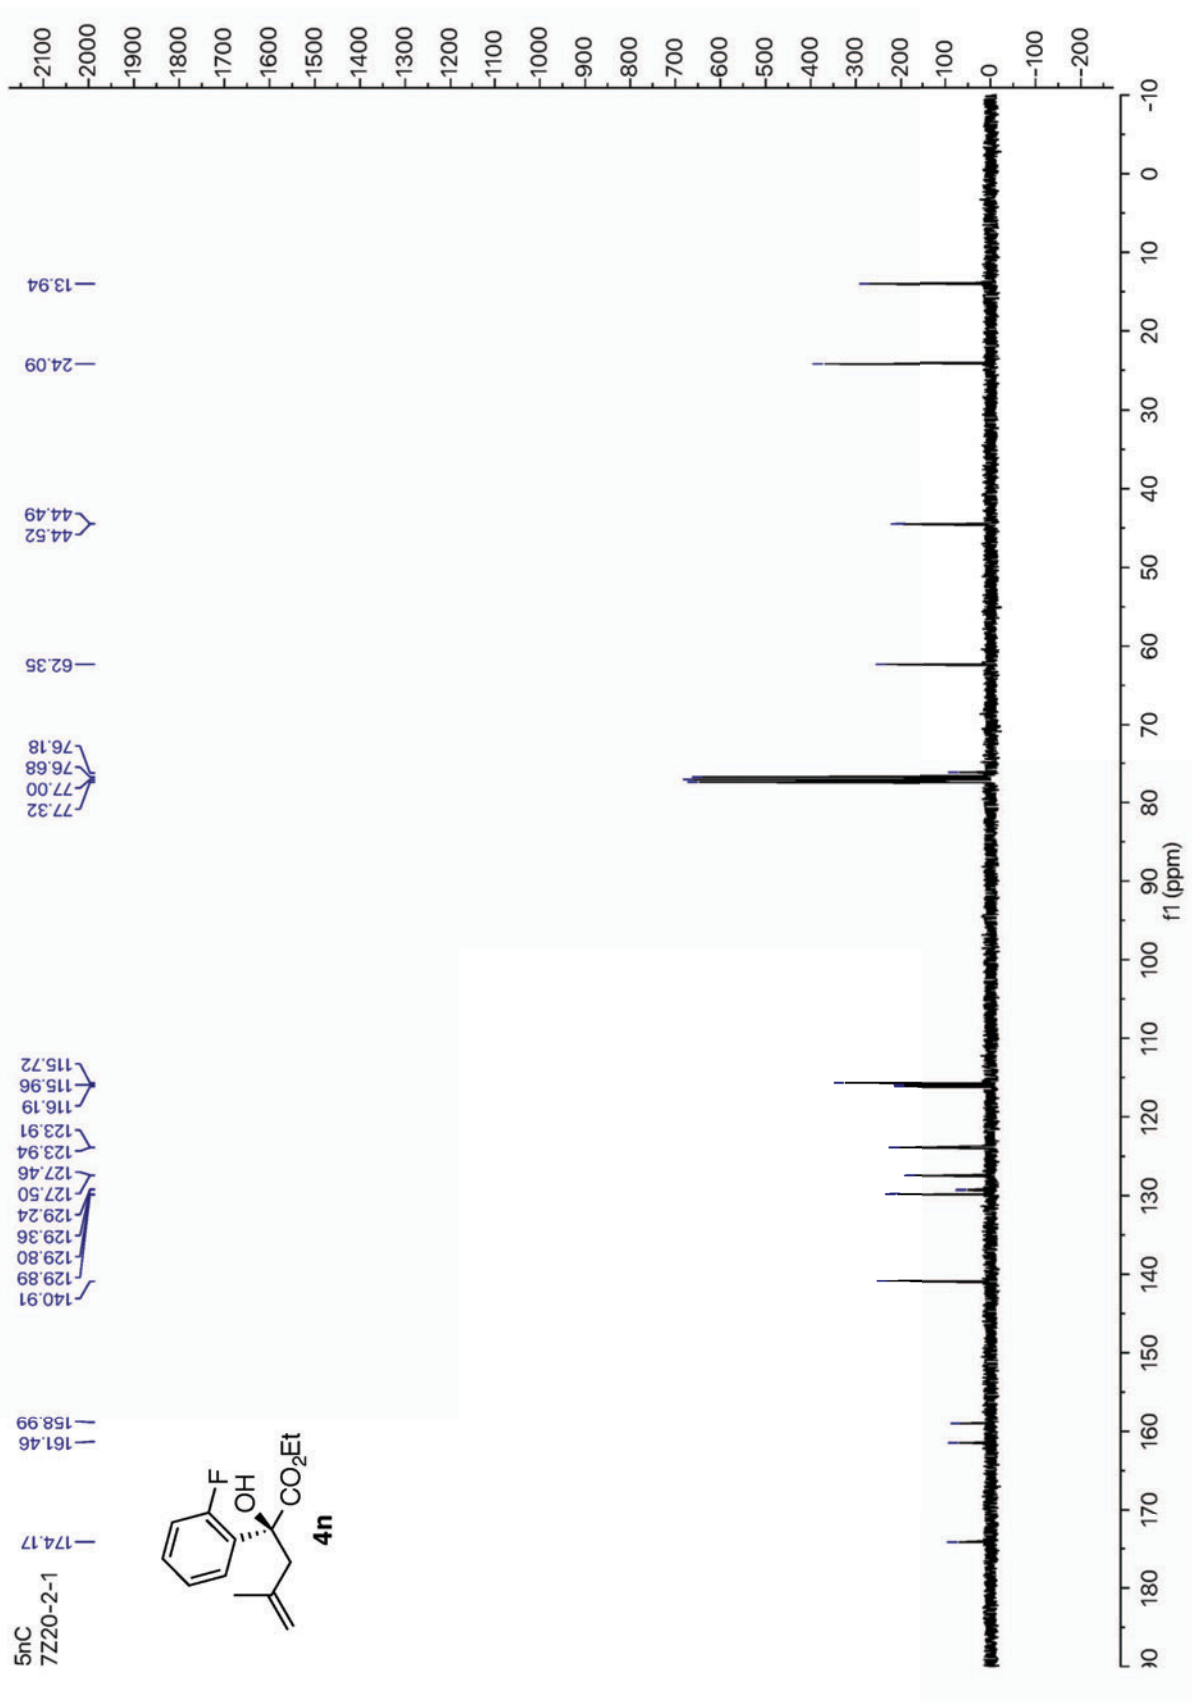

<sup>13</sup>C NMR spectra of compound **4n** (100 MHz, CDCl<sub>3</sub>)

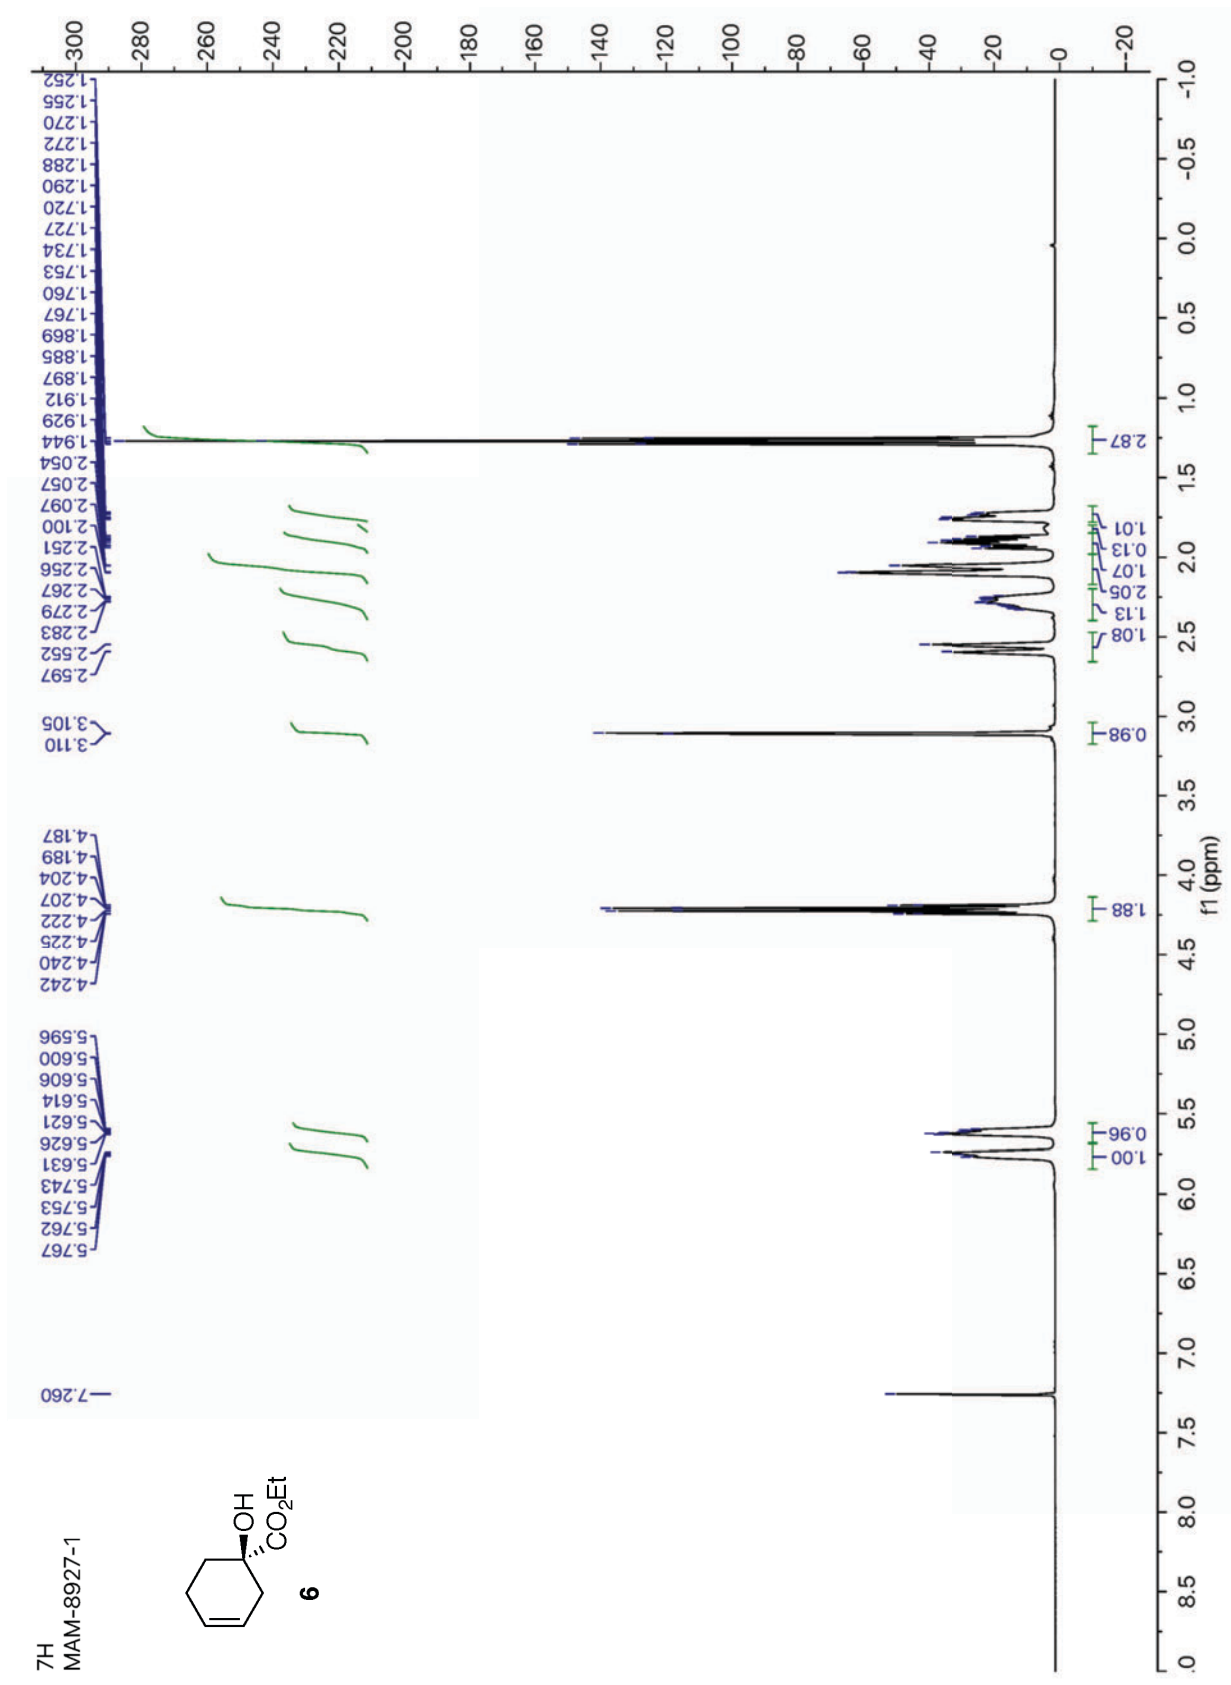

<sup>1</sup>H NMR spectra of compound **6** (400 MHz, CDCl<sub>3</sub>)

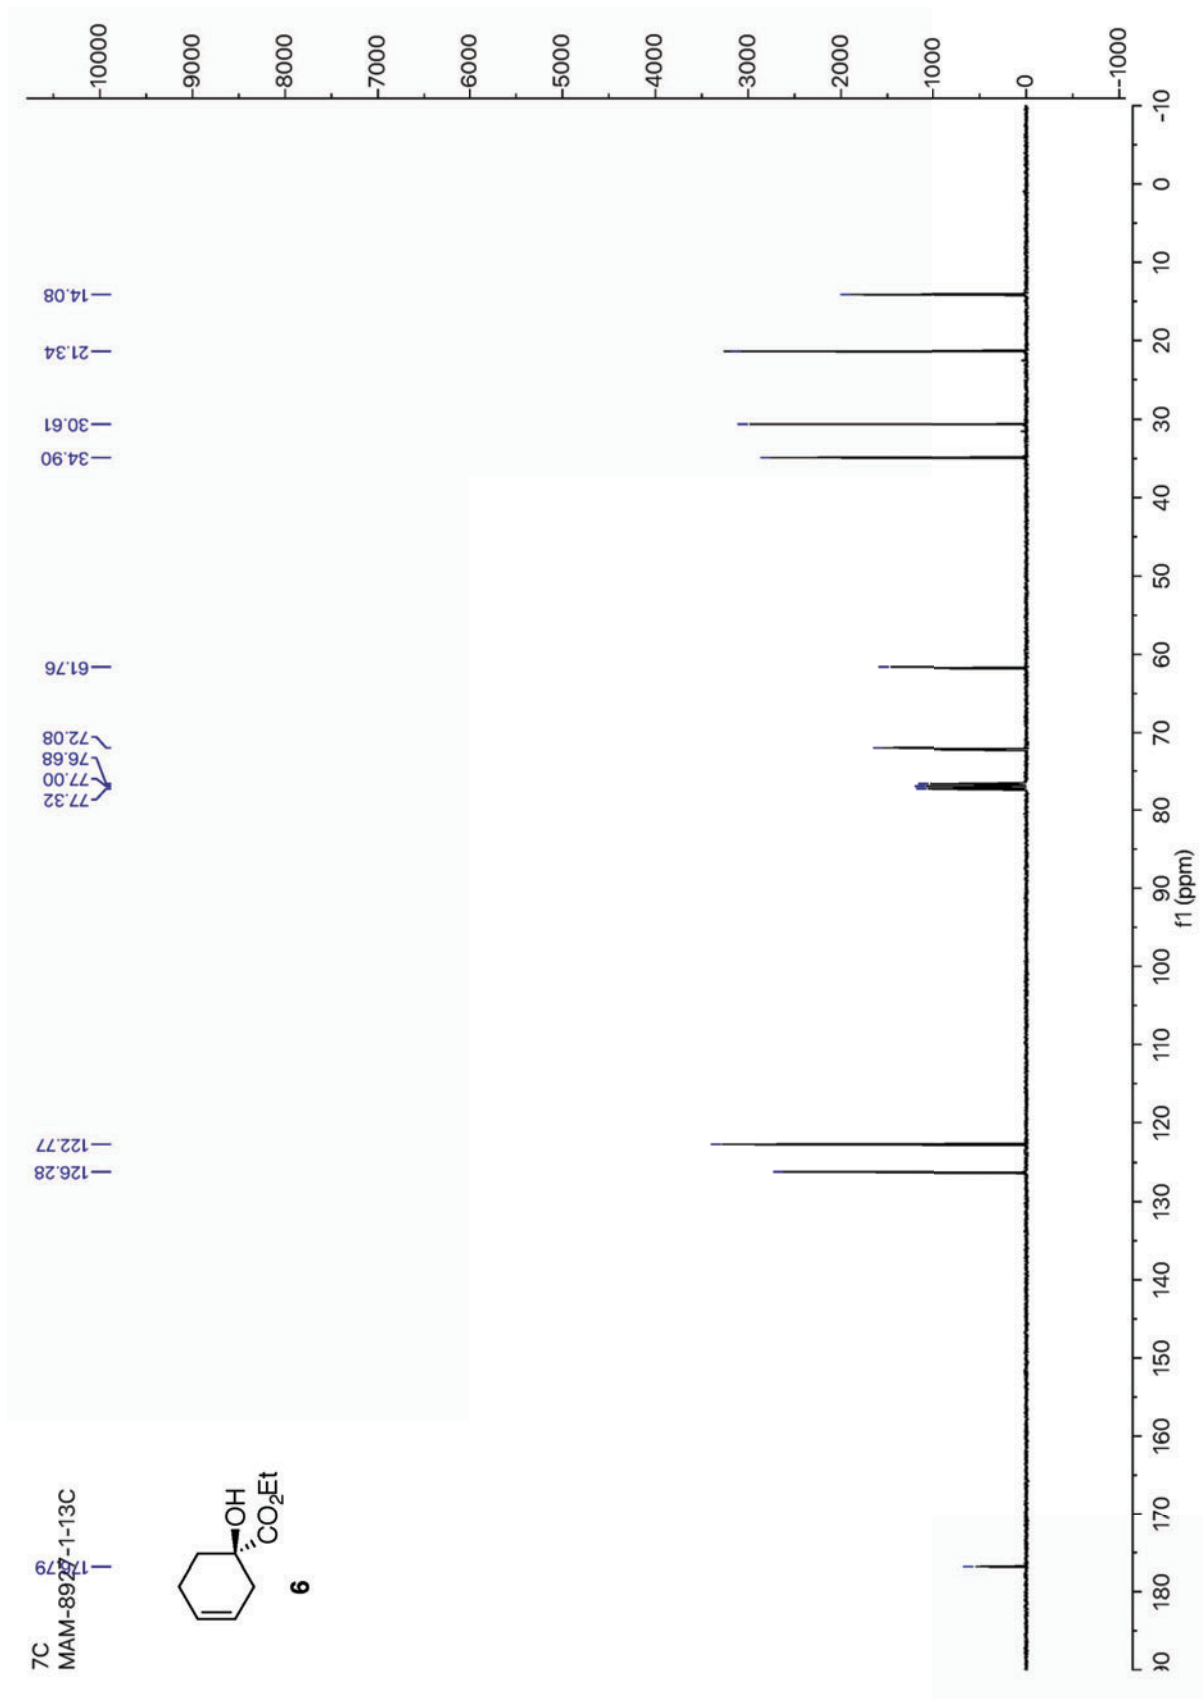

$^{13}\text{C}$  NMR spectra of compound **6** (100 MHz,  $\text{CDCl}_3$ )



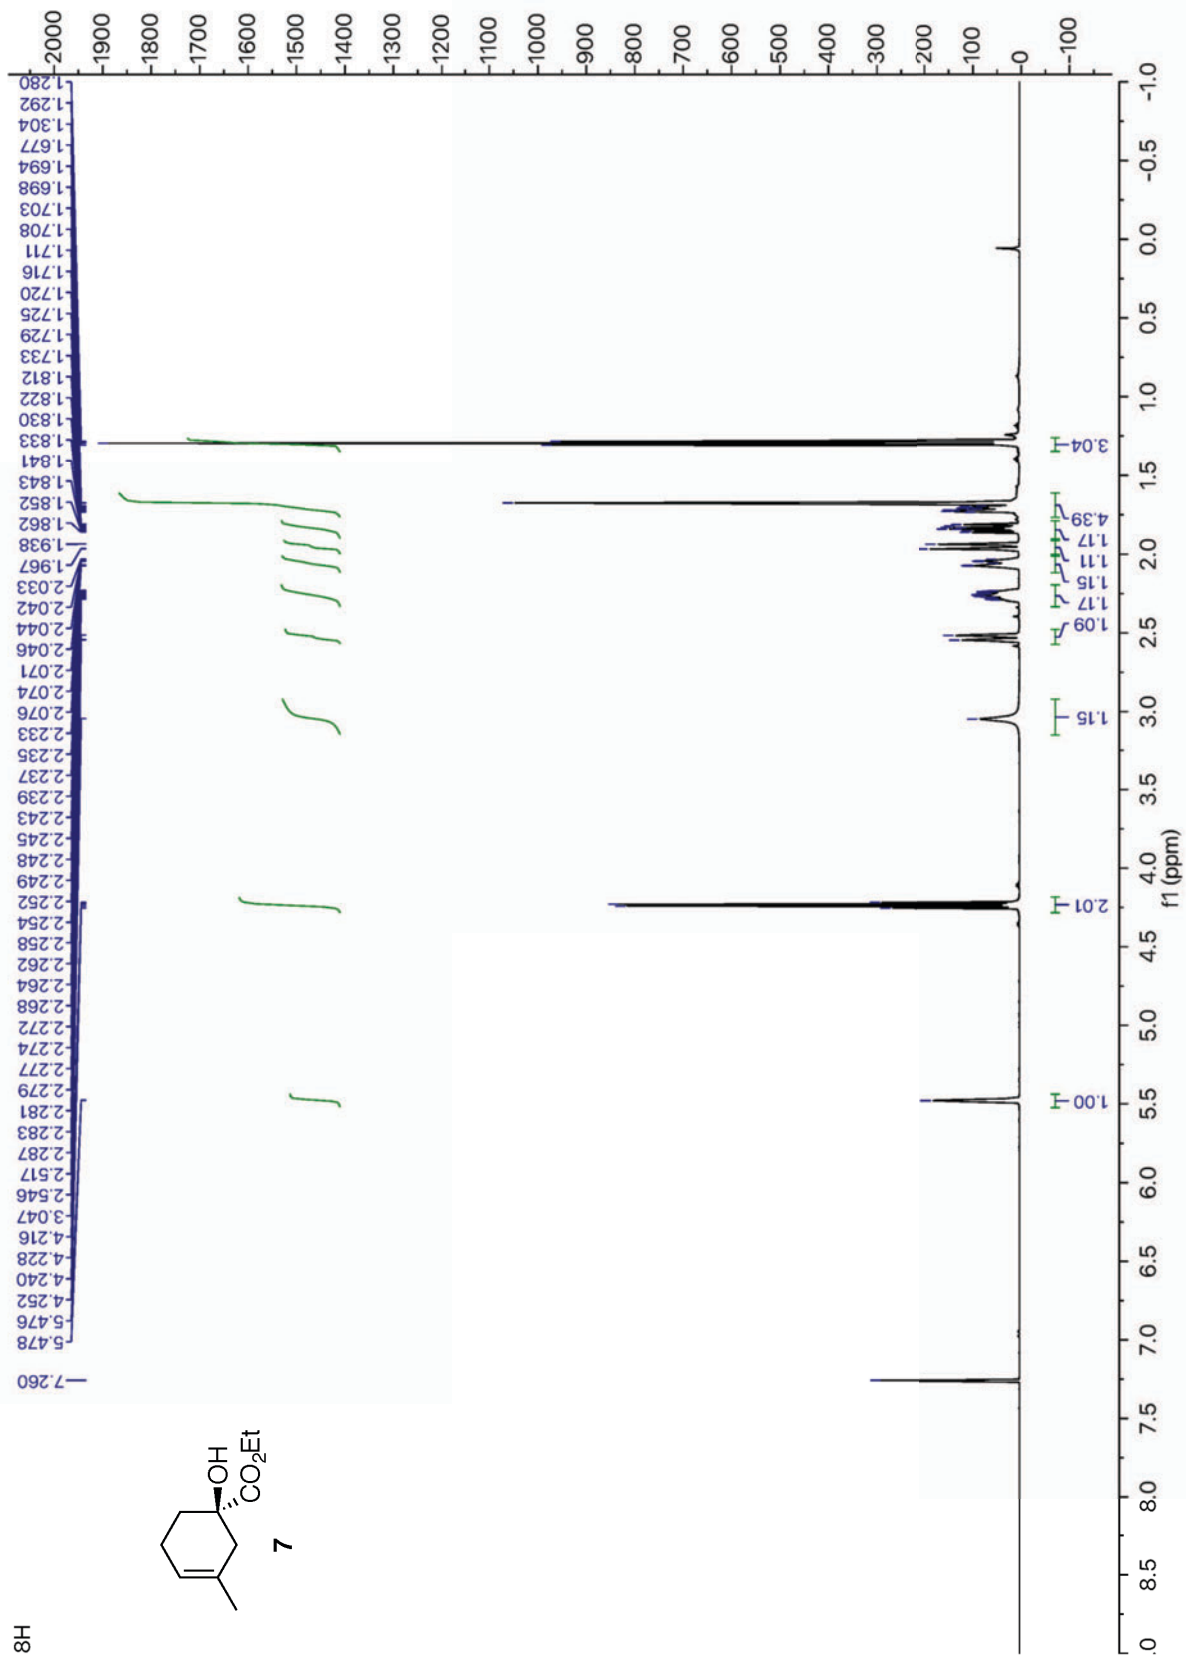

<sup>1</sup>H NMR spectra of compound 7 (600 MHz, CDCl<sub>3</sub>)

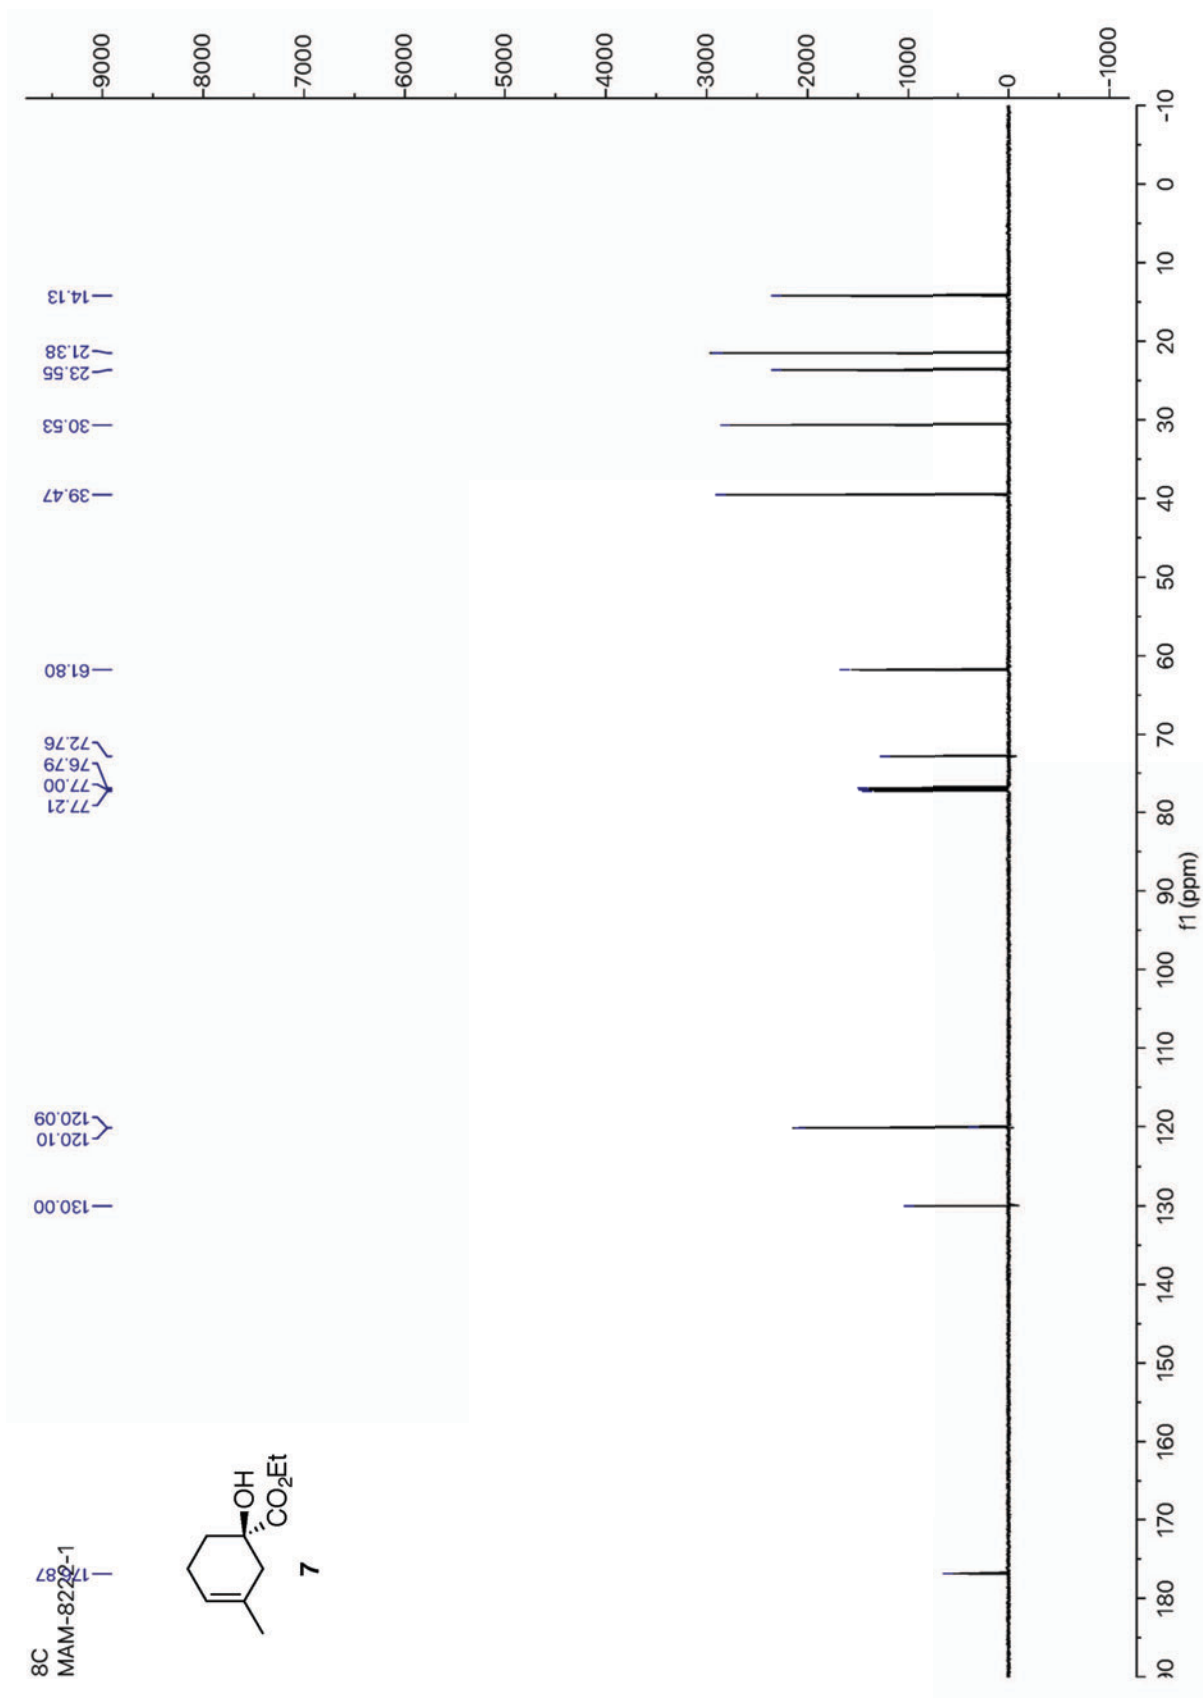

$^{13}\text{C}$  NMR spectra of compound 7 (150 MHz,  $\text{CDCl}_3$ )

## Chiral HPLC Charts of New Compounds

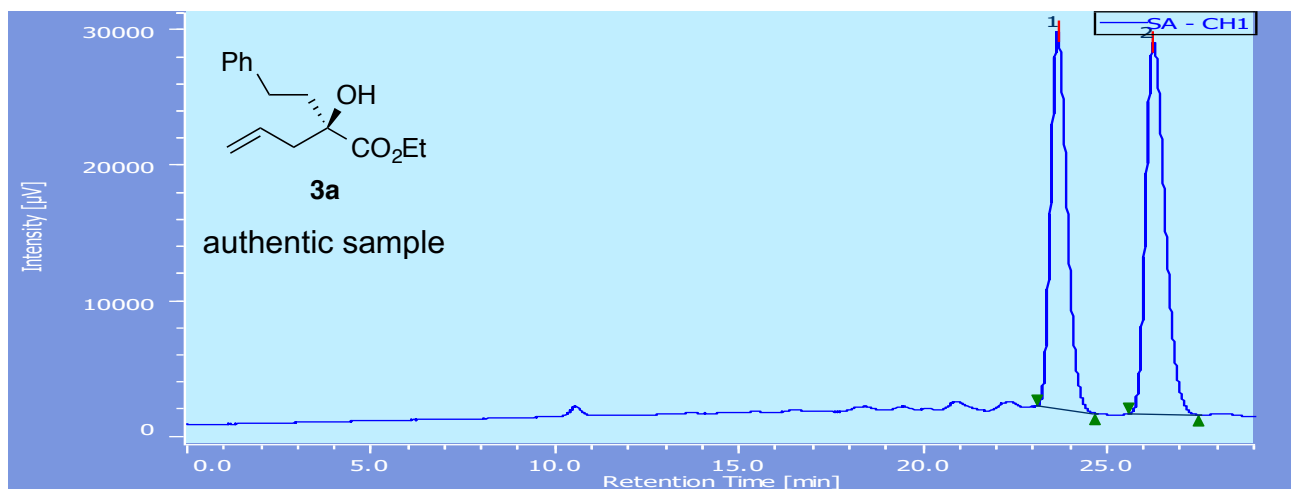

| peak | retention time | area   | hight | area, % | hight, % |
|------|----------------|--------|-------|---------|----------|
| 1    | 23.617         | 854805 | 27765 | 46.311  | 50.434   |
| 2    | 26.217         | 991006 | 27287 | 53.689  | 49.566   |

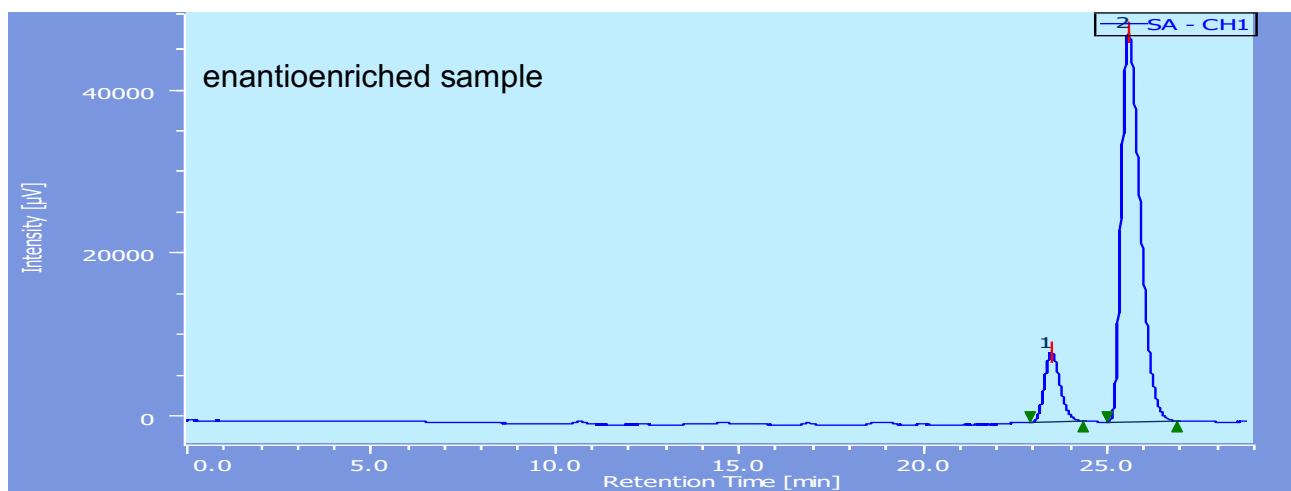

| peak | retention time | area    | hight | area, % | hight, % |
|------|----------------|---------|-------|---------|----------|
| 1    | 23.442         | 254249  | 8548  | 12.988  | 15.230   |
| 2    | 25.533         | 1703385 | 47579 | 87.012  | 84.770   |

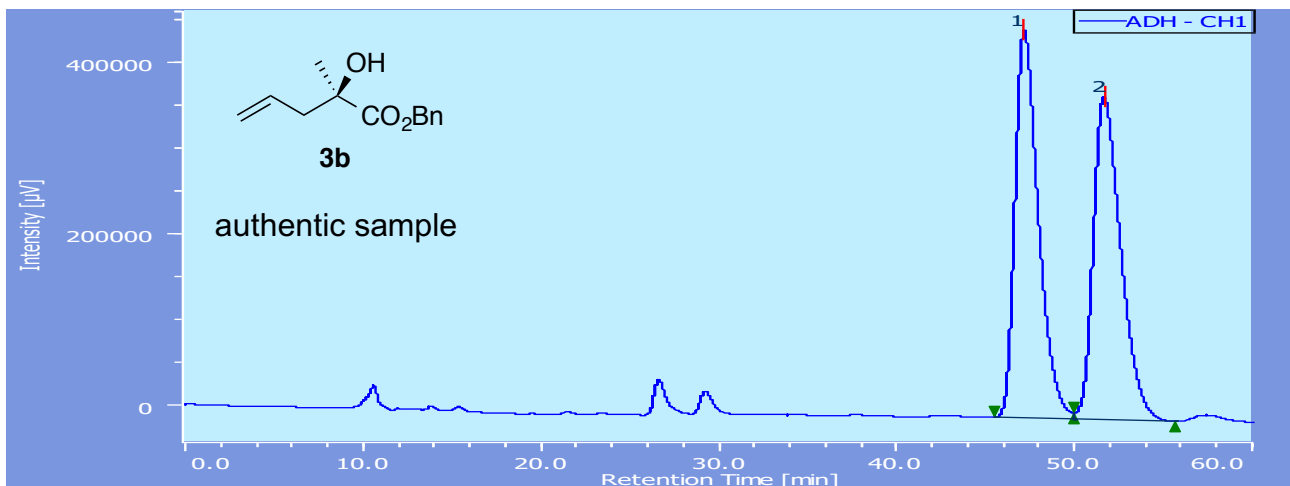

| peak | retention time | area     | hight  | area, % | hight, % |
|------|----------------|----------|--------|---------|----------|
| 1    | 47.075         | 41272906 | 451280 | 50.621  | 54.570   |
| 2    | 51.558         | 40259831 | 375694 | 49.379  | 45.430   |

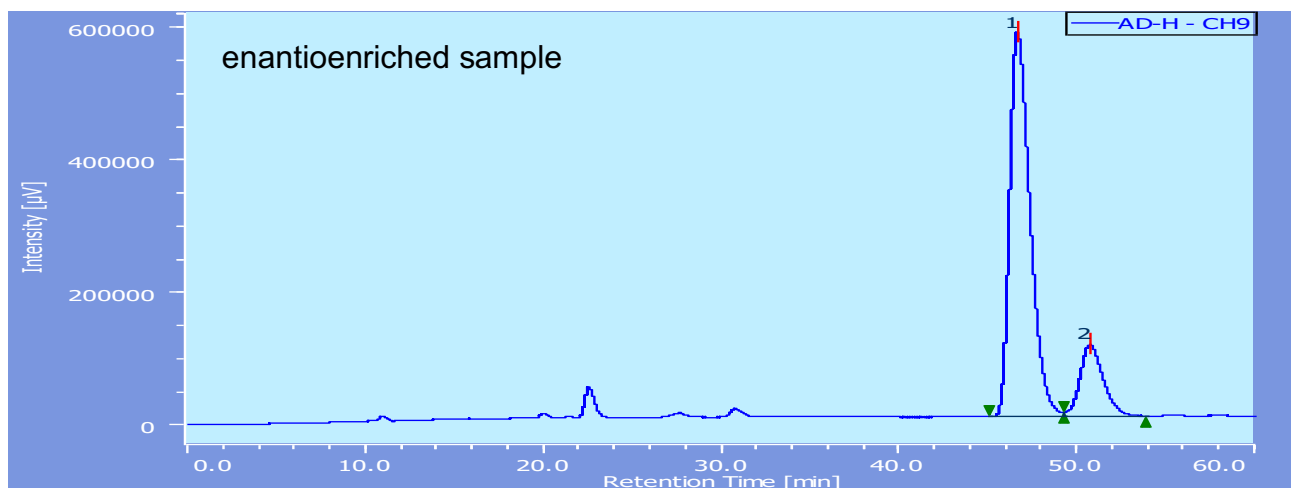

| peak | retention time | area     | hight  | area, % | hight, % |
|------|----------------|----------|--------|---------|----------|
| 1    | 46.590         | 46298311 | 579348 | 82.526  | 84.333   |
| 2    | 50.657         | 9803346  | 107631 | 17.474  | 15.667   |

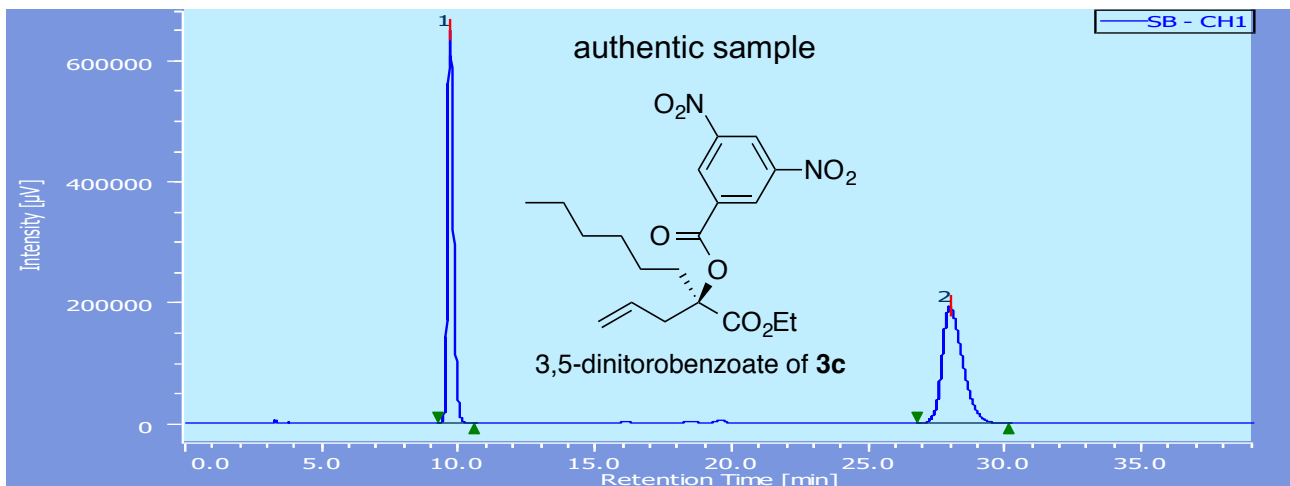

| peak | retention time | area     | hight  | area, % | hight, % |
|------|----------------|----------|--------|---------|----------|
| 1    | 9.675          | 9529135  | 647711 | 48.672  | 77.134   |
| 2    | 27.925         | 10049024 | 192009 | 51.328  | 22.866   |

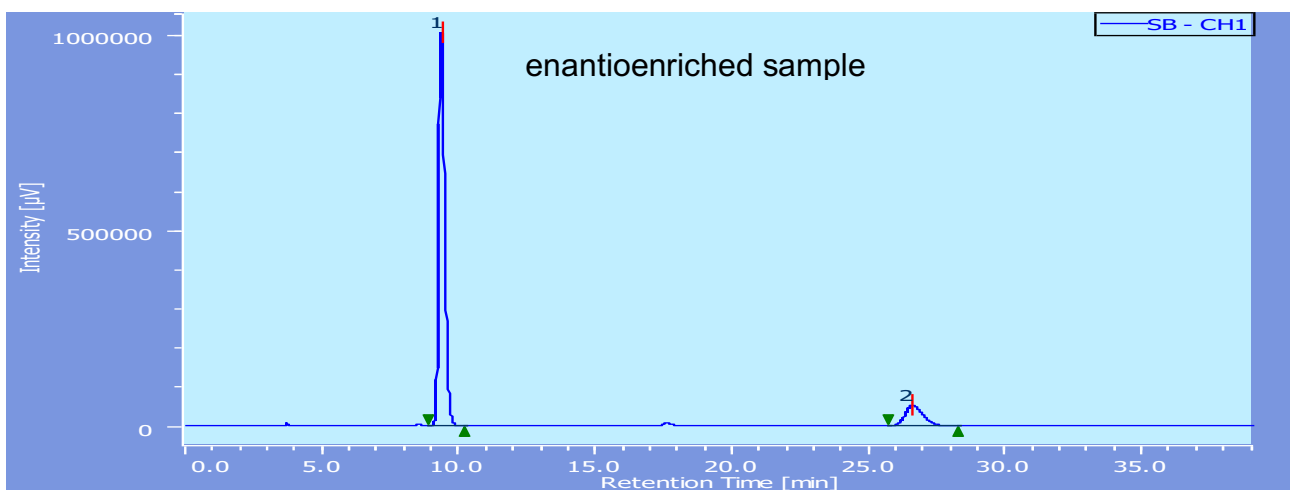

| peak | retention time | area     | hight   | area, % | hight, % |
|------|----------------|----------|---------|---------|----------|
| 1    | 9.383          | 15956972 | 1002517 | 86.871  | 94.993   |
| 2    | 26.575         | 2411598  | 52842   | 13.129  | 5.007    |

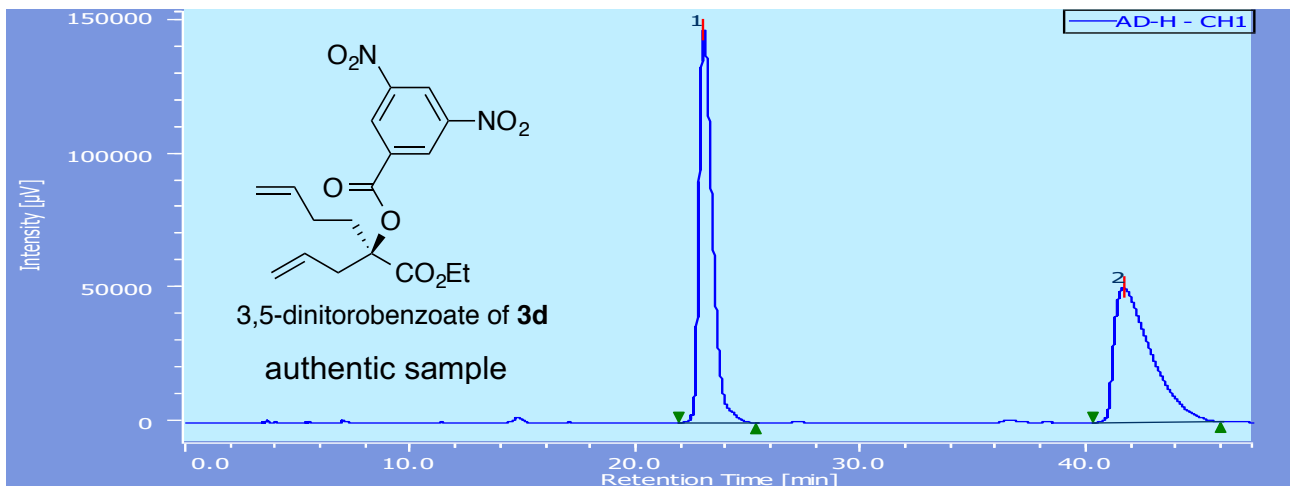

| peak | retention time | area    | hight  | area, % | hight, % |
|------|----------------|---------|--------|---------|----------|
| 1    | 23.000         | 6075661 | 146360 | 51.453  | 74.446   |
| 2    | 41.608         | 5732500 | 50239  | 48.547  | 25.554   |

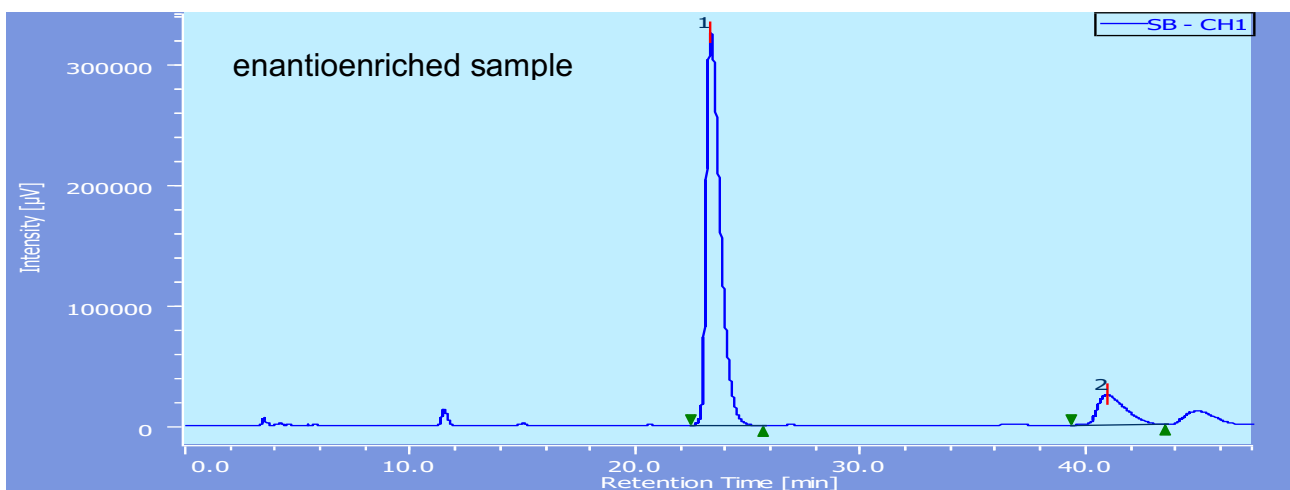

| peak | retention time | area     | hight  | area, % | hight, % |
|------|----------------|----------|--------|---------|----------|
| 1    | 23.308         | 14164853 | 324815 | 86.814  | 92.904   |
| 2    | 40.842         | 2151433  | 24809  | 13.186  | 7.096    |

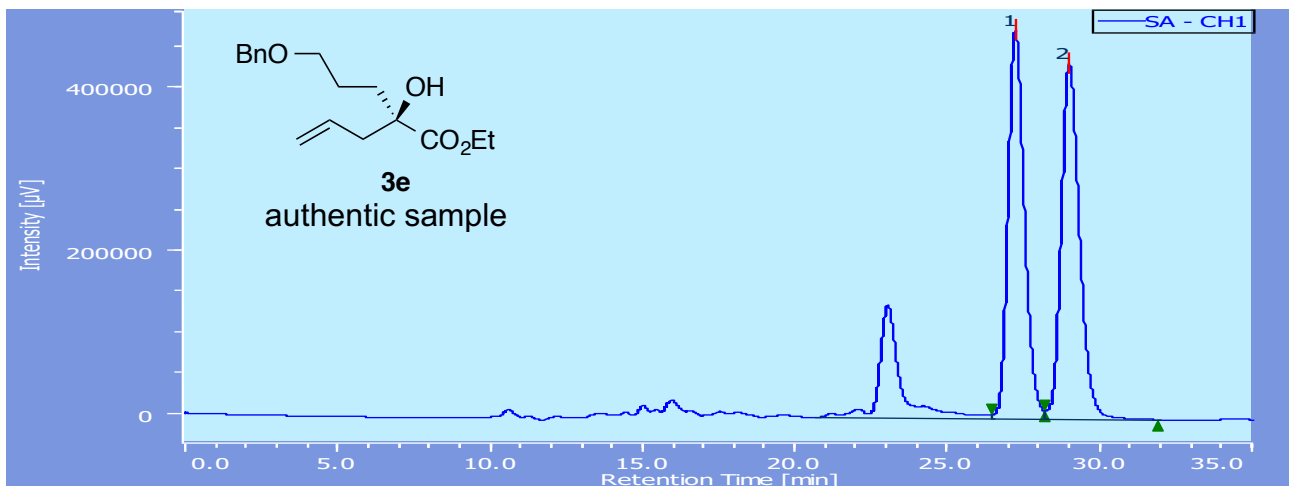

| peak | retention time | area     | hight  | area, % | hight, % |
|------|----------------|----------|--------|---------|----------|
| 1    | 27.175         | 17801104 | 475186 | 49.521  | 52.259   |
| 2    | 28.942         | 18145229 | 434107 | 50.479  | 47.741   |

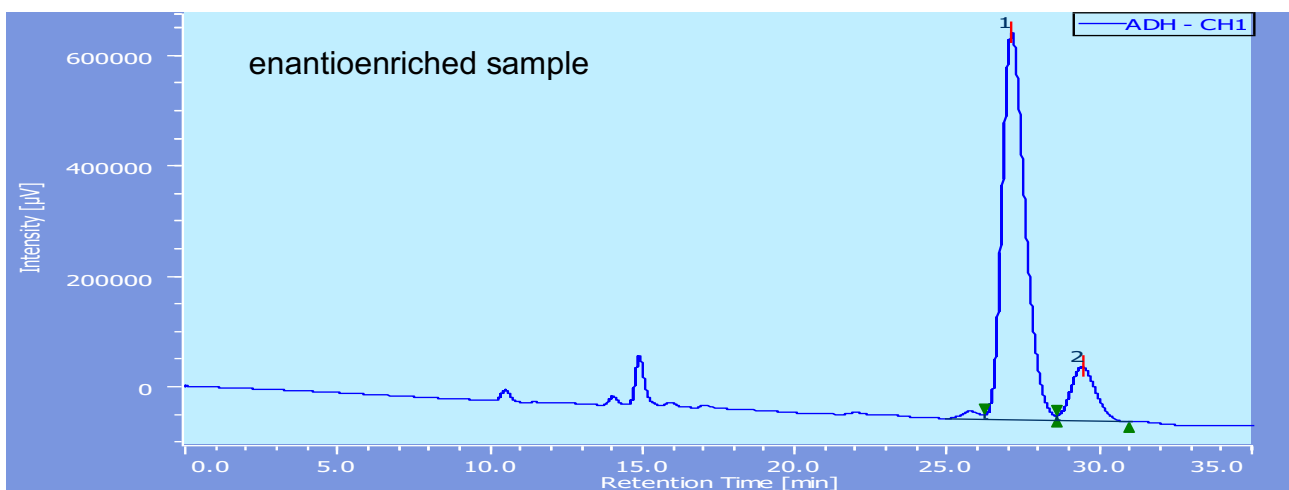

| peak | retention time | area     | hight  | area, % | hight, % |
|------|----------------|----------|--------|---------|----------|
| 1    | 27.058         | 36854353 | 699211 | 86.698  | 87.640   |
| 2    | 29.367         | 5654384  | 98613  | 13.302  | 12.360   |

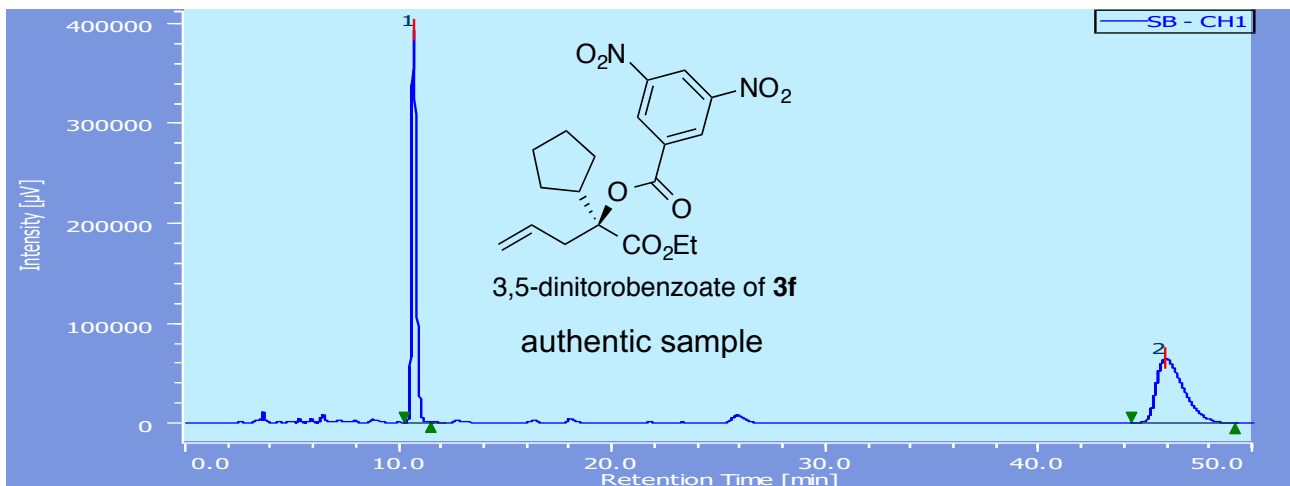

| peak | retention time | area    | hight  | area, % | hight, % |
|------|----------------|---------|--------|---------|----------|
| 1    | 10.692         | 5760819 | 391486 | 50.232  | 85.895   |
| 2    | 45.858         | 5707596 | 64286  | 49.768  | 14.105   |

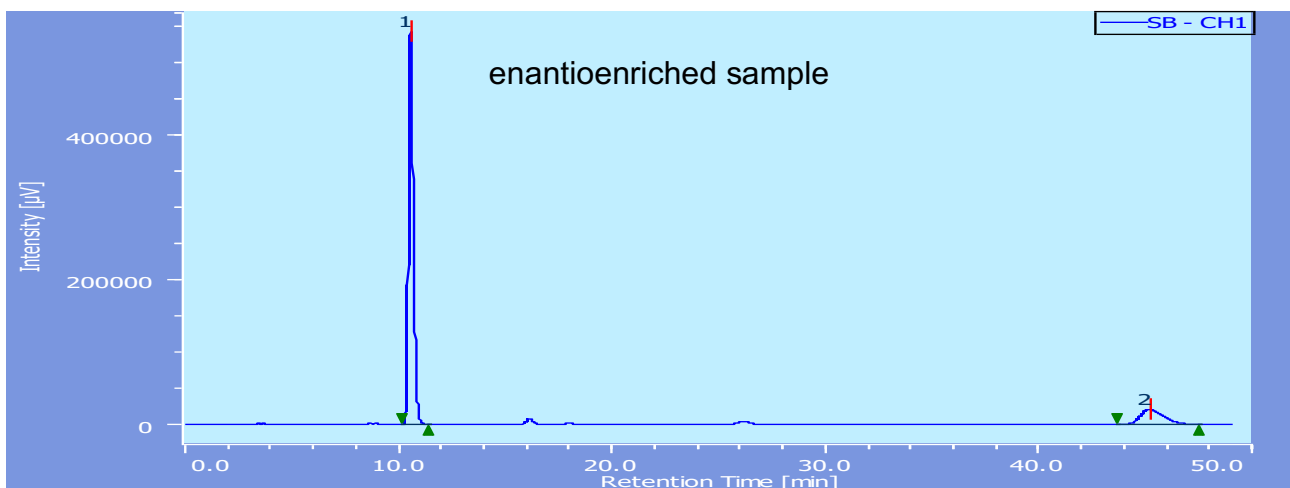

| peak | retention time | area    | hight  | area, % | hight, % |
|------|----------------|---------|--------|---------|----------|
| 1    | 10.542         | 8760510 | 541283 | 84.274  | 96.265   |
| 2    | 45.108         | 1634816 | 21000  | 15.726  | 3.735    |



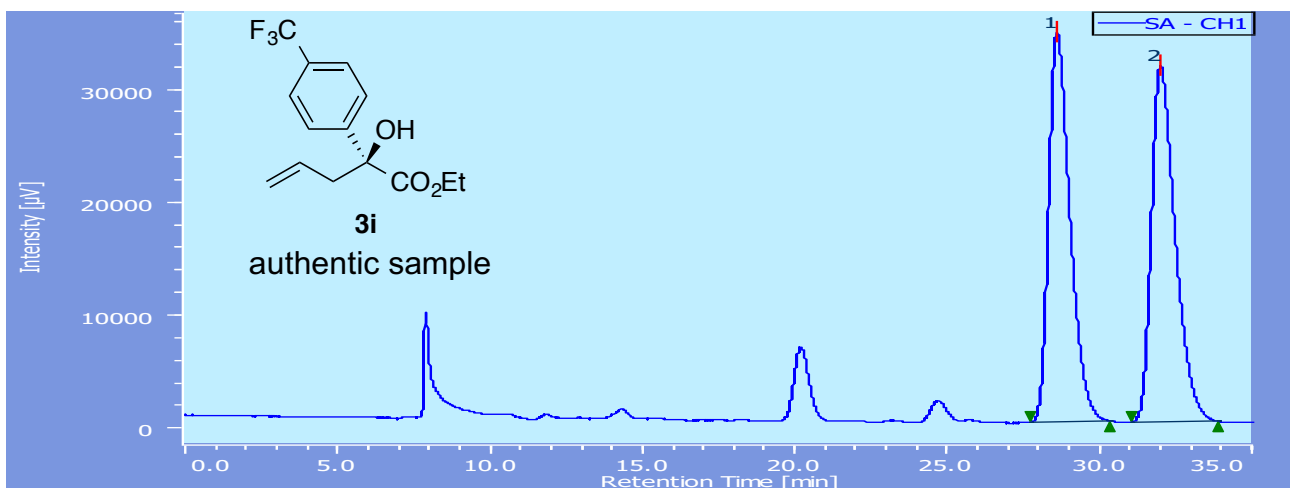

| peak | retention time | area    | hight | area, % | hight, % |
|------|----------------|---------|-------|---------|----------|
| 1    | 28.542         | 1668497 | 34431 | 49.496  | 52.262   |
| 2    | 31.933         | 1702475 | 31450 | 50.504  | 47.738   |

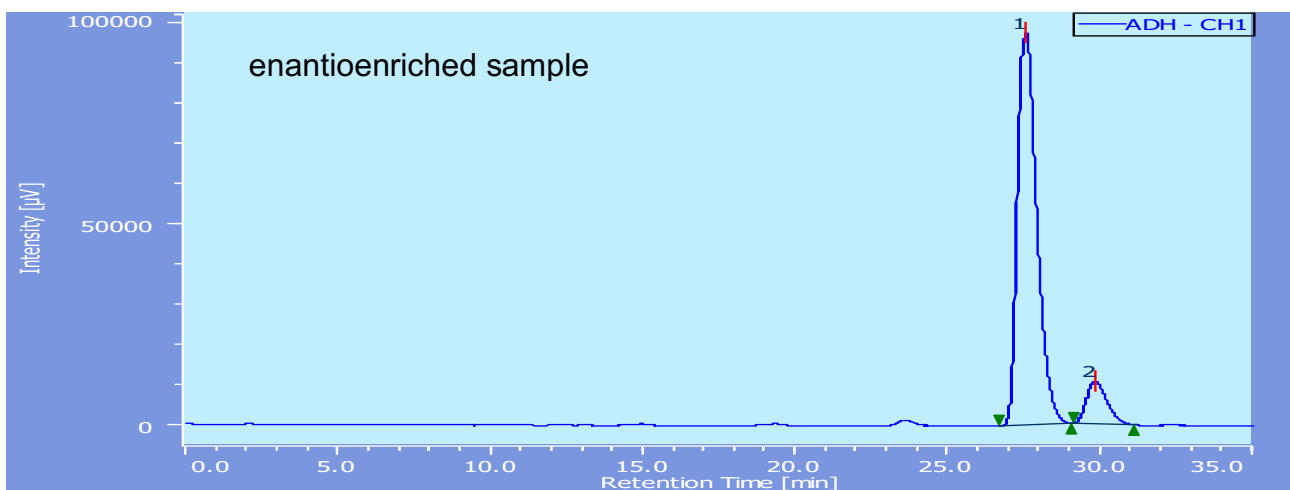

| peak | retention time | area    | hight | area, % | hight, % |
|------|----------------|---------|-------|---------|----------|
| 1    | 27.542         | 4330337 | 97280 | 89.667  | 90.144   |
| 2    | 29.783         | 499007  | 10636 | 10.333  | 9.856    |

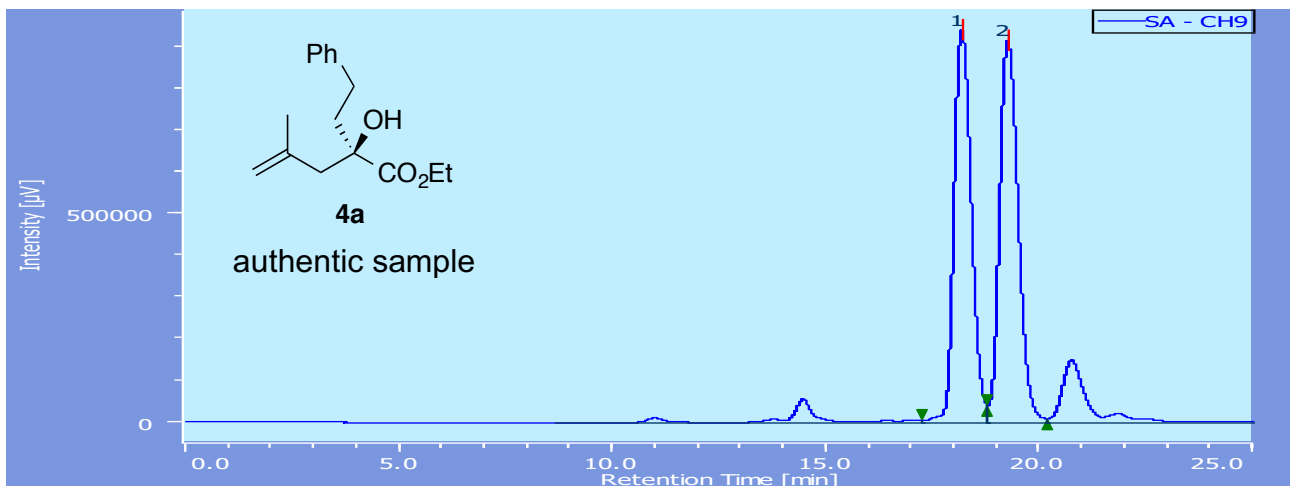

| peak | retention time | area     | hight  | area, % | hight, % |
|------|----------------|----------|--------|---------|----------|
| 1    | 18.162         | 26759913 | 940147 | 48.977  | 50.691   |
| 2    | 19.237         | 27877805 | 914507 | 51.023  | 49.309   |

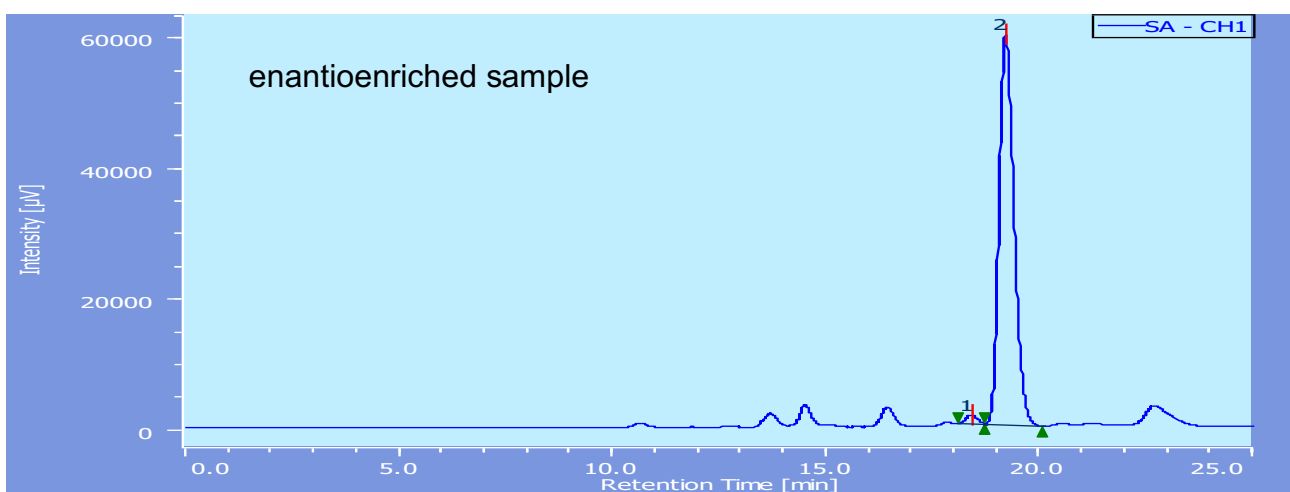

| peak | retention time | area    | hight | area, % | hight, % |
|------|----------------|---------|-------|---------|----------|
| 1    | 18.392         | 27900   | 1391  | 1.891   | 2.281    |
| 2    | 19.183         | 1447885 | 59564 | 98.109  | 97.719   |

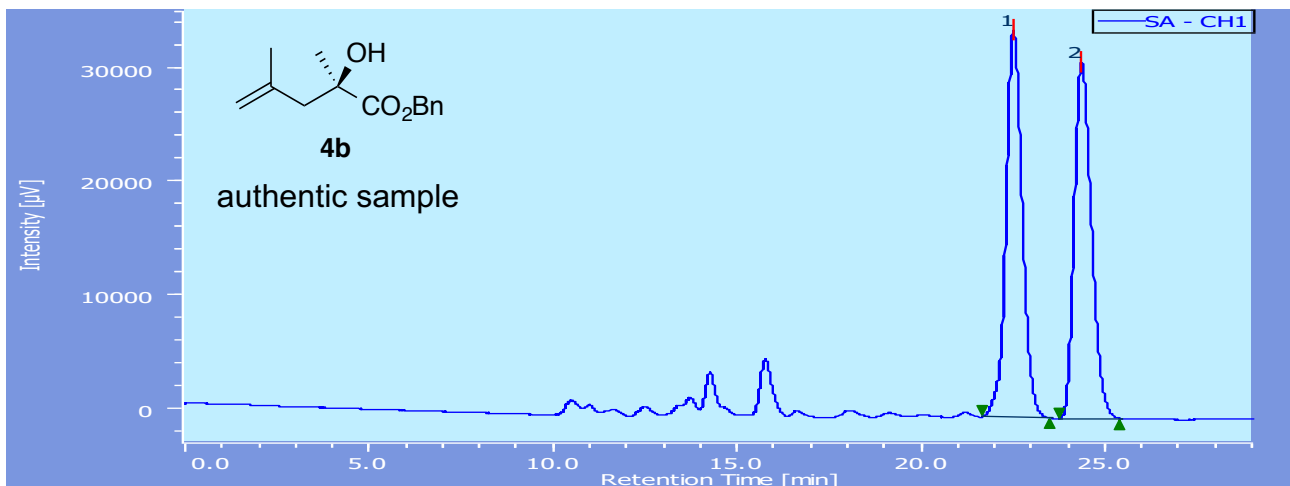

| peak | retention time | area    | hight | area, % | hight, % |
|------|----------------|---------|-------|---------|----------|
| 1    | 22.467         | 1044691 | 33958 | 50.741  | 52.131   |
| 2    | 24.317         | 1014164 | 31182 | 49.259  | 47.869   |

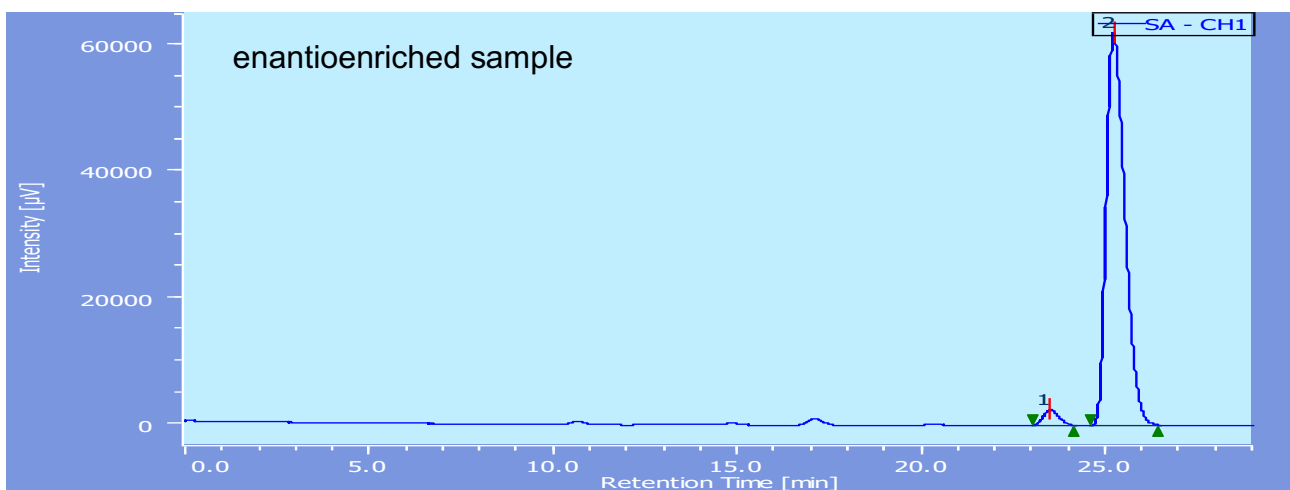

| peak | retention time | area    | hight | area, % | hight, % |
|------|----------------|---------|-------|---------|----------|
| 1    | 23.467         | 71809   | 2418  | 3.188   | 3.759    |
| 2    | 25.183         | 2180921 | 61927 | 96.812  | 96.241   |

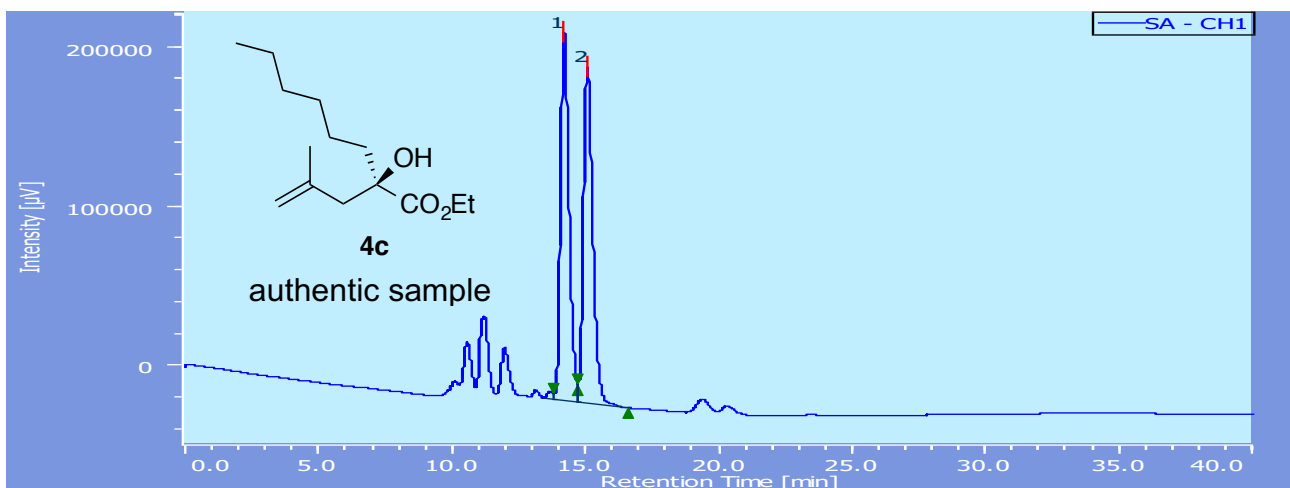

| peak | retention time | area    | hight  | area, % | hight, % |
|------|----------------|---------|--------|---------|----------|
| 1    | 14.183         | 5111456 | 230627 | 49.733  | 52.322   |
| 2    | 15.042         | 5166264 | 210157 | 50.267  | 47.678   |

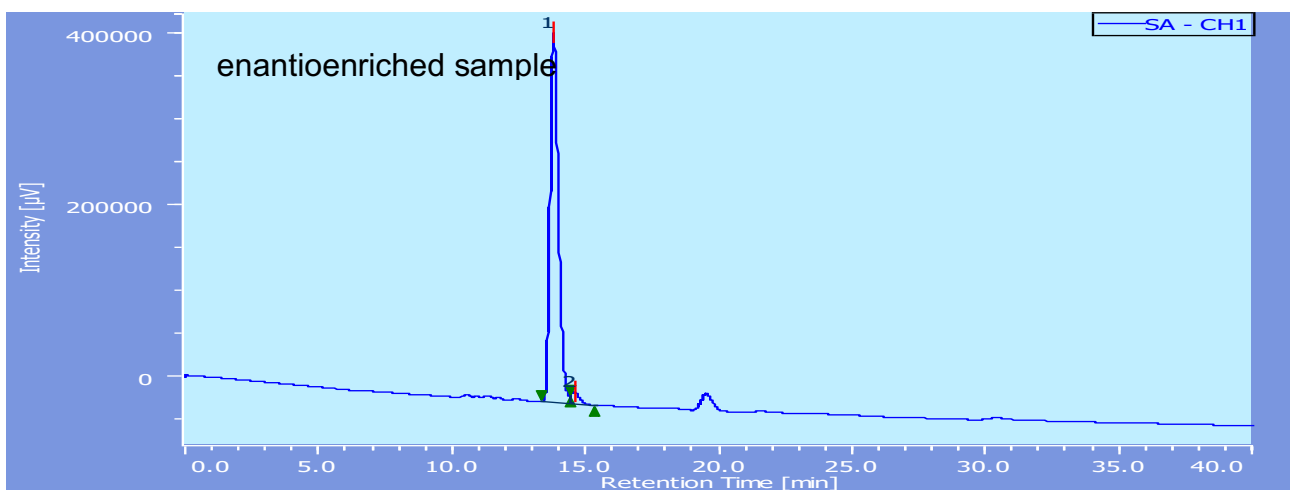

| peak | retention time | area    | hight  | area, % | hight, % |
|------|----------------|---------|--------|---------|----------|
| 1    | 13.783         | 9456551 | 430158 | 96.844  | 96.857   |
| 2    | 14.550         | 308221  | 13959  | 3.156   | 3.143    |

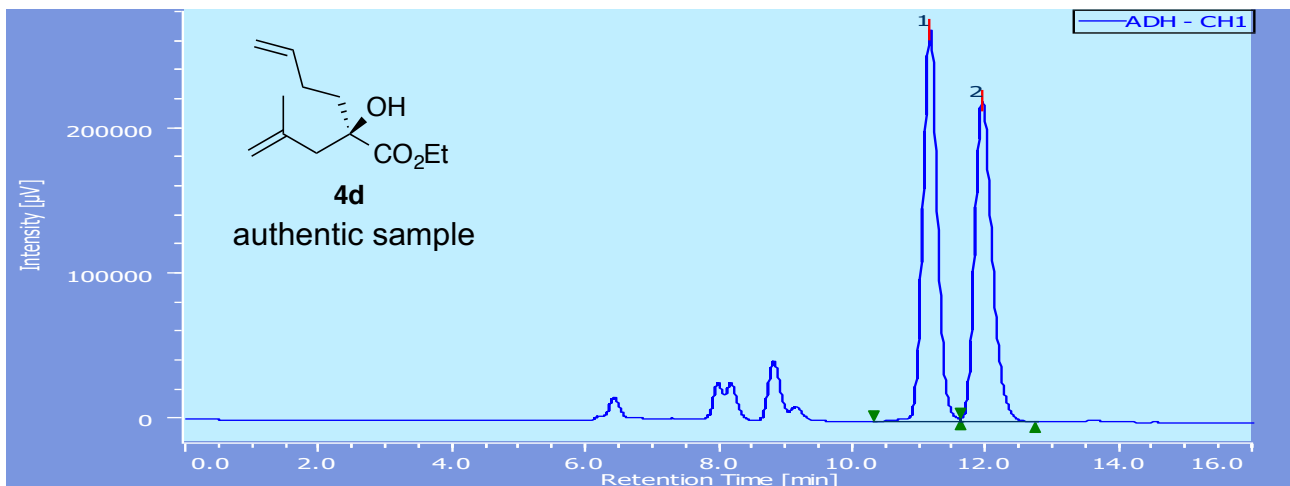

| peak | retention time | area    | hight  | area, % | hight, % |
|------|----------------|---------|--------|---------|----------|
| 1    | 11.150         | 4082391 | 268789 | 50.397  | 55.027   |
| 2    | 11.933         | 4018120 | 219678 | 49.603  | 44.973   |

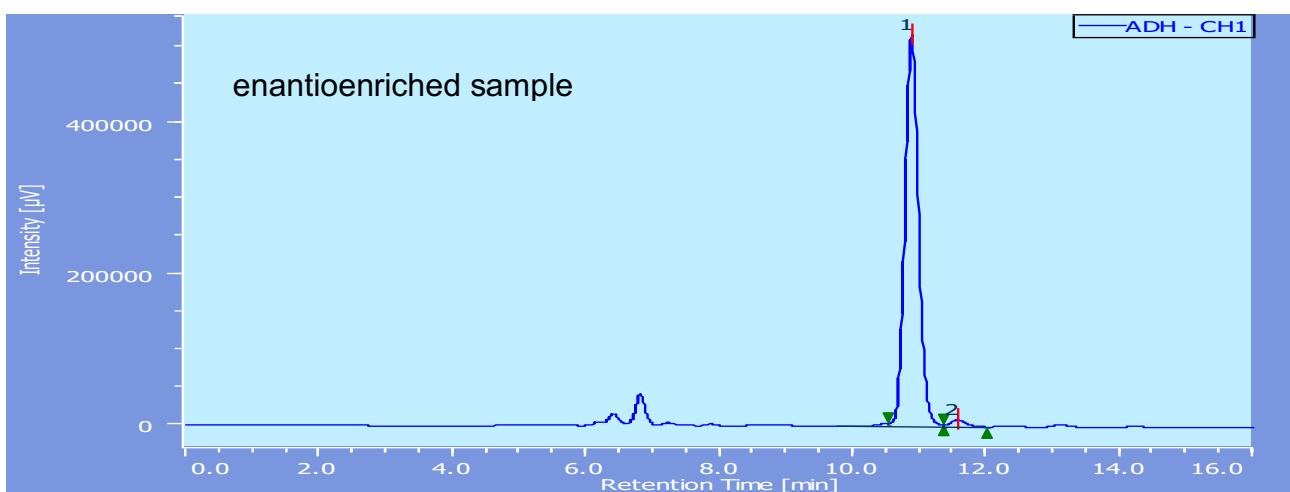

| peak | retention time | area    | hight  | area, % | hight, % |
|------|----------------|---------|--------|---------|----------|
| 1    | 10.875         | 7434726 | 516941 | 97.996  | 98.199   |
| 2    | 11.550         | 152057  | 9481   | 2.004   | 1.801    |

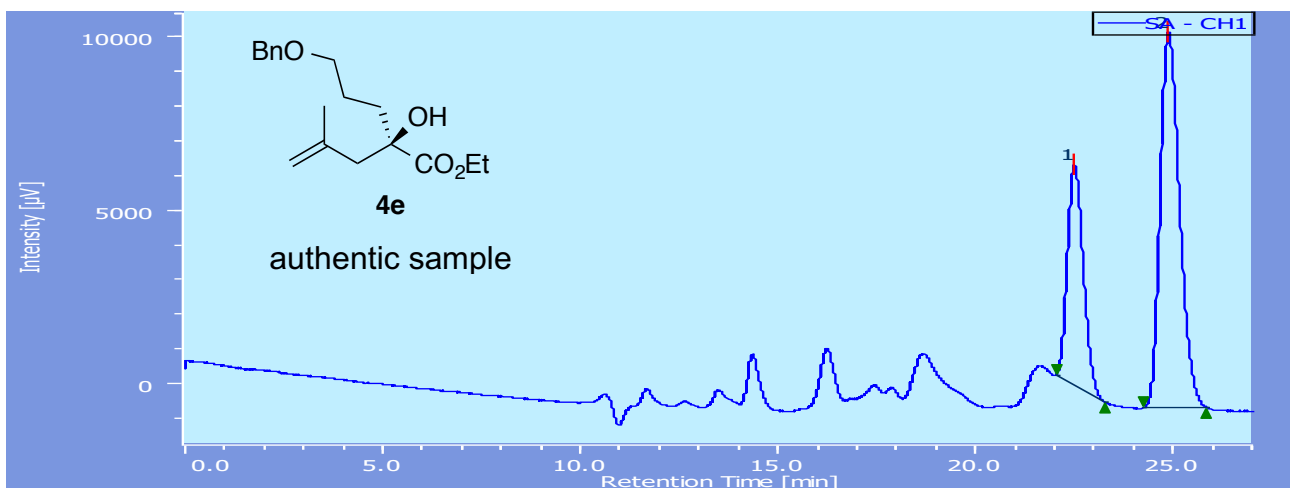

| peak | retention time | area   | hight | area, % | hight, % |
|------|----------------|--------|-------|---------|----------|
| 1    | 22.458         | 178414 | 6319  | 32.711  | 36.949   |
| 2    | 24.833         | 367016 | 10783 | 67.289  | 63.051   |

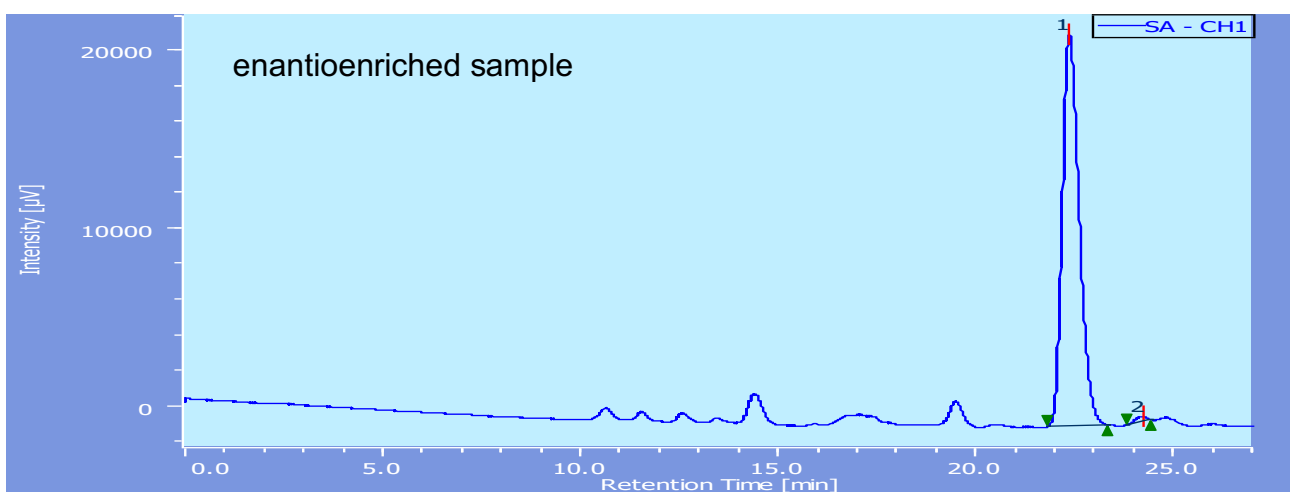

| peak | retention time | area   | hight | area, % | hight, % |
|------|----------------|--------|-------|---------|----------|
| 1    | 22.333         | 655198 | 21975 | 99.086  | 98.773   |
| 2    | 24.175         | 6045   | 273   | 0.914   | 1.227    |

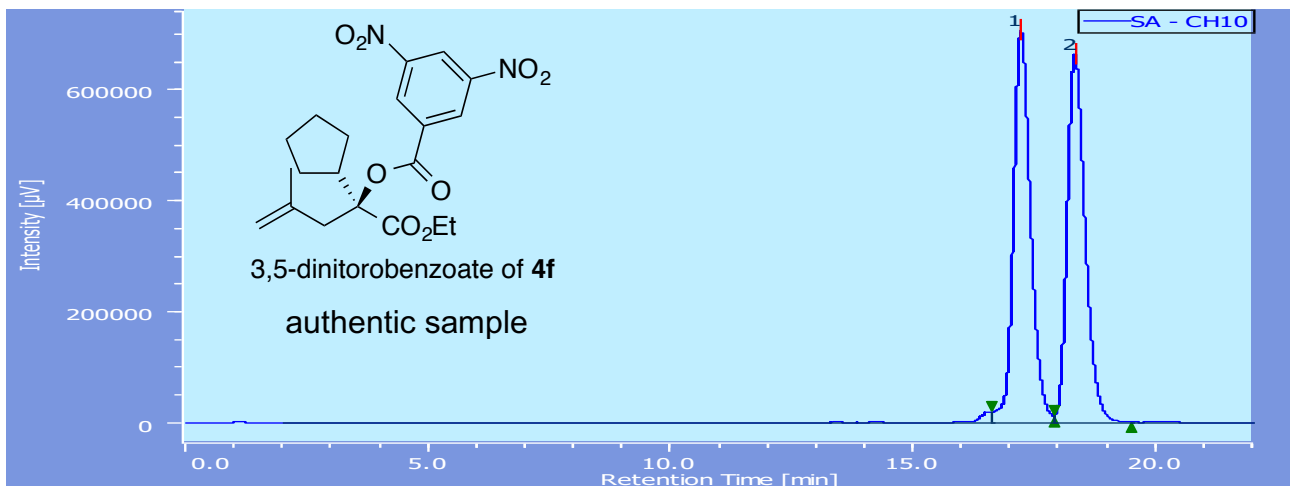

| peak | retention time | area     | hight  | area, % | hight, % |
|------|----------------|----------|--------|---------|----------|
| 1    | 17.202         | 17519894 | 705798 | 50.532  | 51.592   |
| 2    | 18.310         | 17151168 | 662241 | 49.468  | 48.408   |

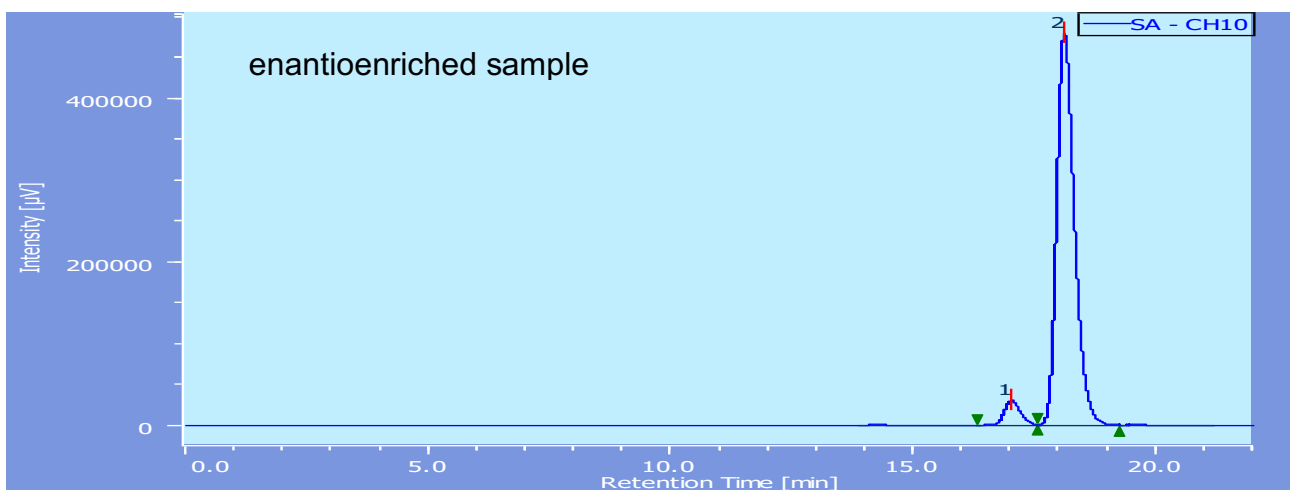

| peak | retention time | area     | hight  | area, % | hight, % |
|------|----------------|----------|--------|---------|----------|
| 1    | 17.007         | 765478   | 30868  | 5.901   | 6.053    |
| 2    | 18.092         | 12205609 | 479073 | 94.099  | 93.947   |

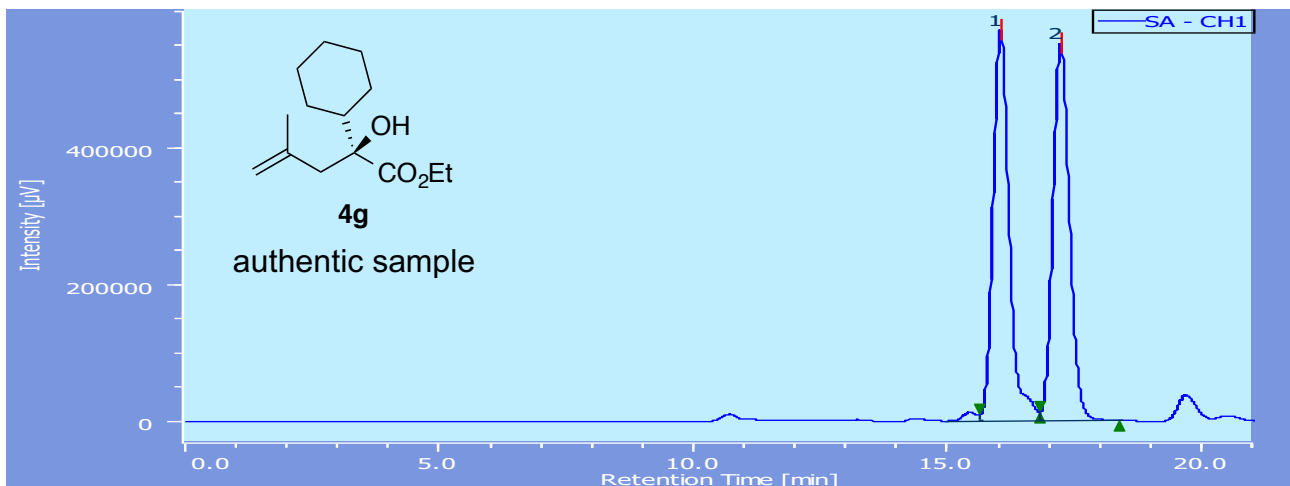

| peak | retention time | area     | hight  | area, % | hight, % |
|------|----------------|----------|--------|---------|----------|
| 1    | 16.017         | 12693677 | 570745 | 50.319  | 50.923   |
| 2    | 17.200         | 12532662 | 550046 | 49.681  | 49.077   |

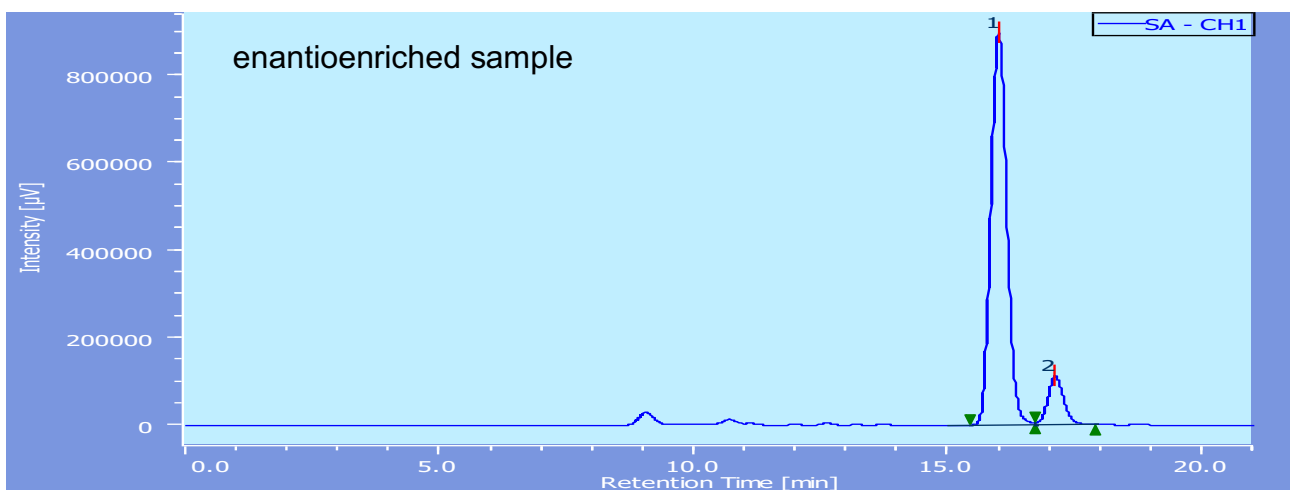

| peak | retention time | area     | hight  | area, % | hight, % |
|------|----------------|----------|--------|---------|----------|
| 1    | 15.983         | 19548334 | 894697 | 89.072  | 89.012   |
| 2    | 17.092         | 2398409  | 110440 | 10.928  | 10.988   |



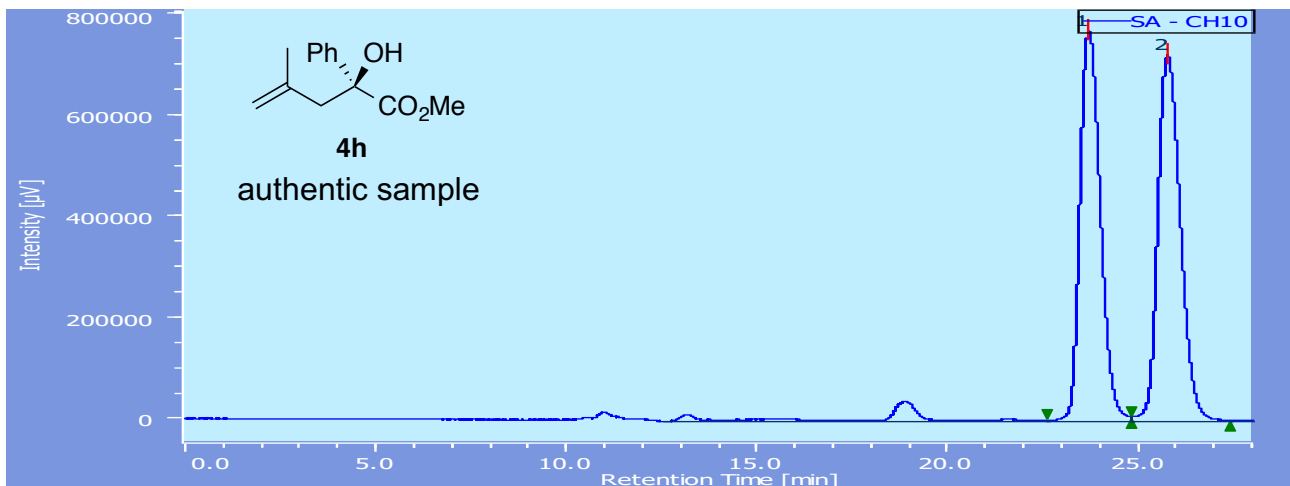

| peak | retention time | area     | hight  | area, % | hight, % |
|------|----------------|----------|--------|---------|----------|
| 1    | 23.660         | 28952121 | 772889 | 49.167  | 51.647   |
| 2    | 25.740         | 29932758 | 723588 | 50.833  | 48.353   |

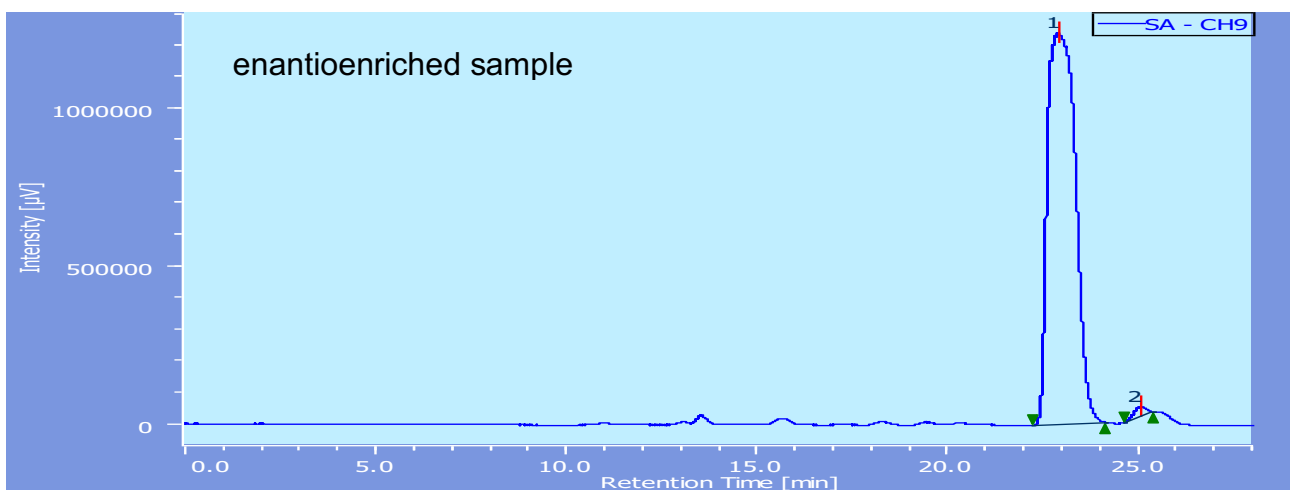

| peak | retention time | area     | hight   | area, % | hight, % |
|------|----------------|----------|---------|---------|----------|
| 1    | 22.868         | 62785878 | 1235620 | 98.813  | 97.433   |
| 2    | 25.043         | 754071   | 32552   | 1.187   | 2.567    |

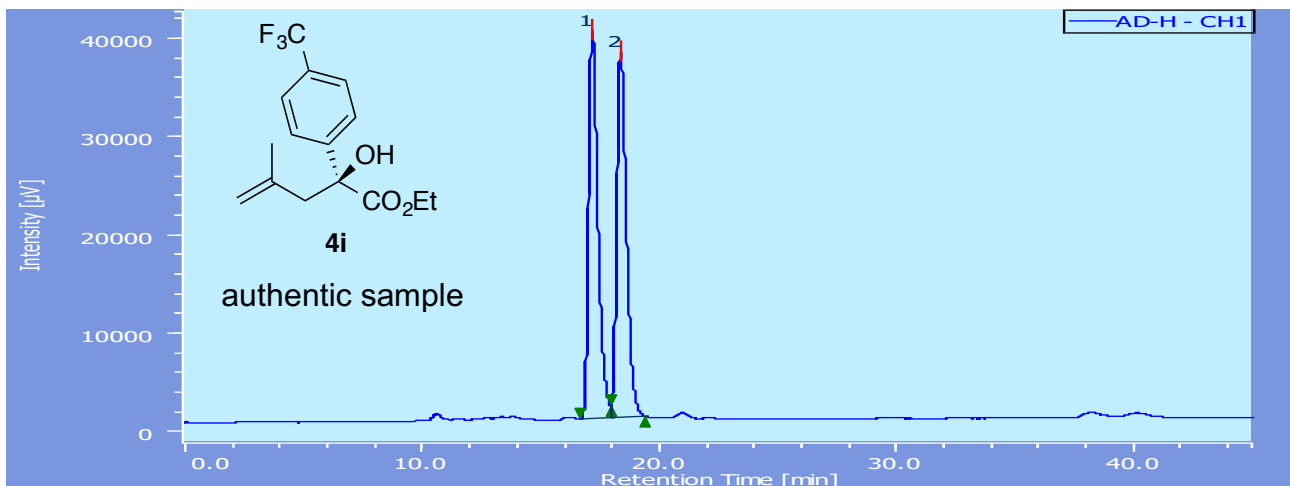

| peak | retention time | area    | hight | area, % | hight, % |
|------|----------------|---------|-------|---------|----------|
| 1    | 17.133         | 1071933 | 39397 | 50.370  | 51.474   |
| 2    | 18.333         | 1056177 | 37140 | 49.630  | 48.526   |

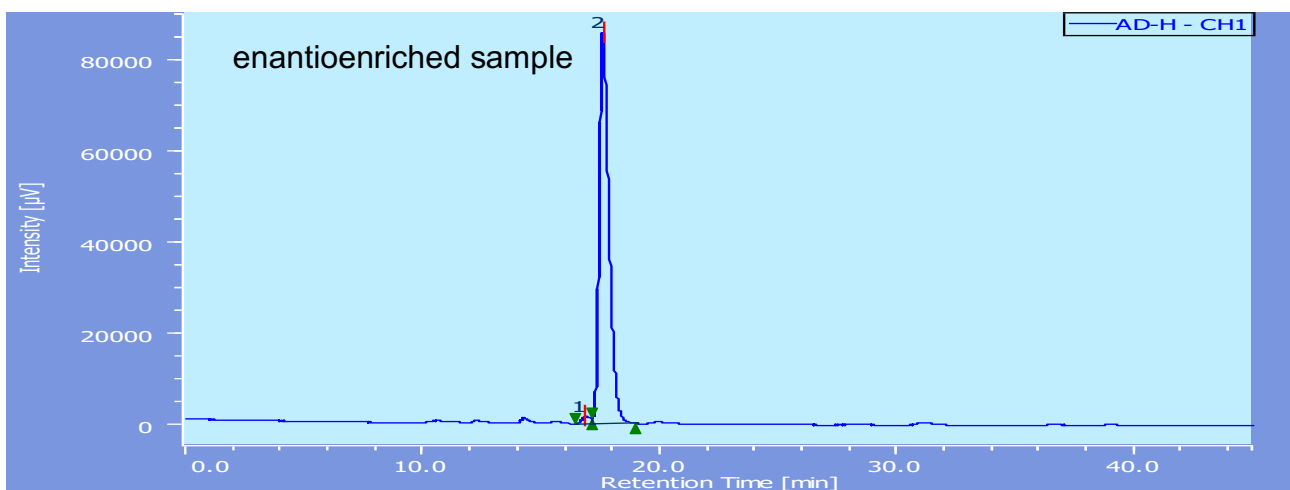

| peak | retention time | area    | hight | area, % | hight, % |
|------|----------------|---------|-------|---------|----------|
| 1    | 16.842         | 39807   | 1655  | 1.595   | 1.893    |
| 2    | 17.592         | 2456102 | 85774 | 98.405  | 98.107   |

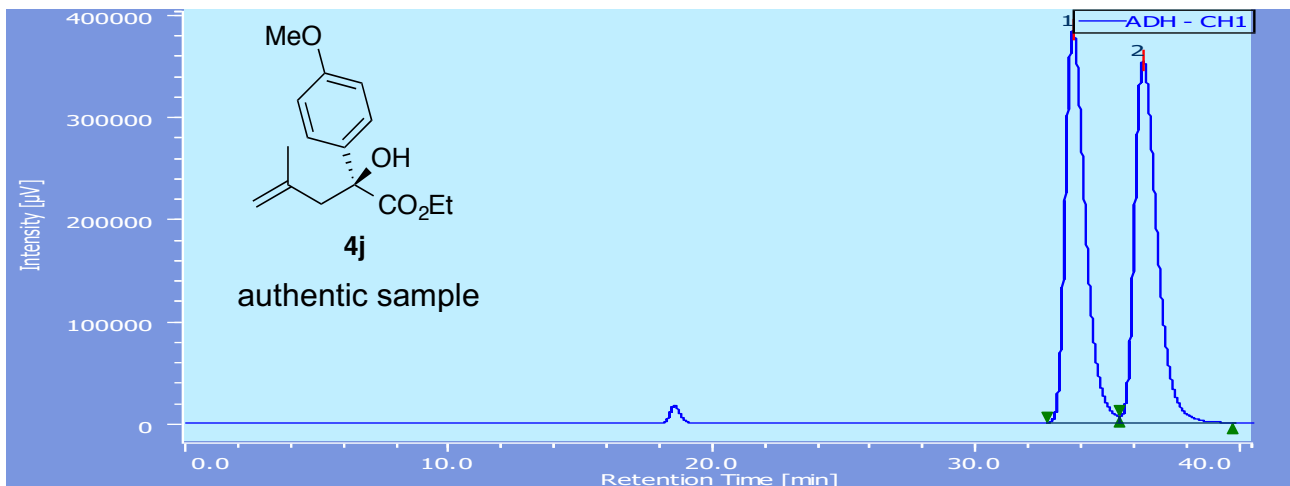

| peak | retention time | area     | hight  | area, % | hight, % |
|------|----------------|----------|--------|---------|----------|
| 1    | 33.633         | 20577298 | 383475 | 49.581  | 52.049   |
| 2    | 36.292         | 20924882 | 353286 | 50.419  | 47.951   |

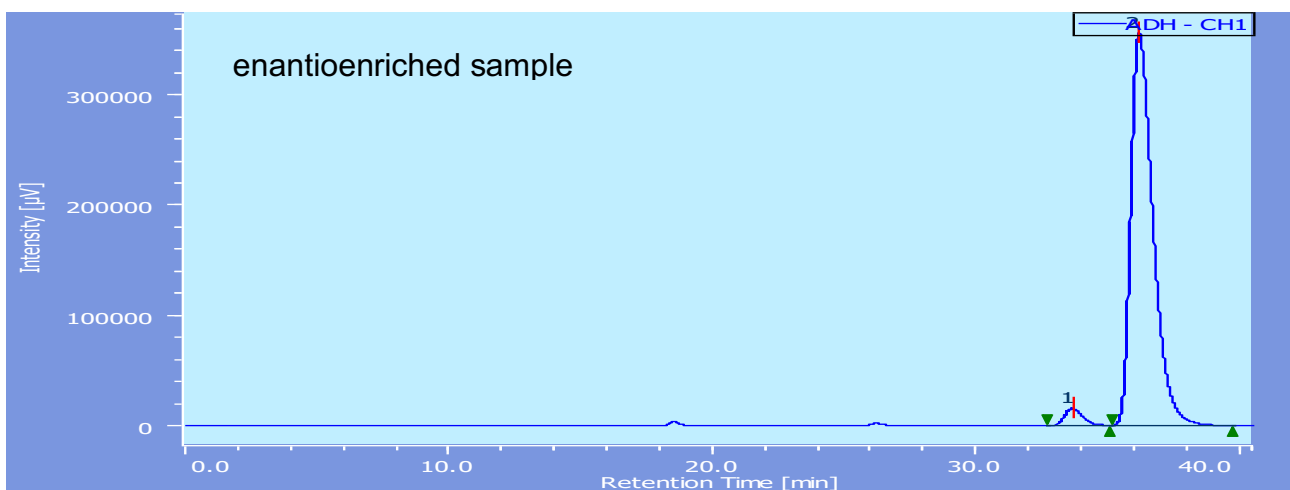

| peak | retention time | area     | hight  | area, % | hight, % |
|------|----------------|----------|--------|---------|----------|
| 1    | 33.617         | 770356   | 15957  | 3.577   | 4.298    |
| 2    | 36.142         | 20767823 | 355272 | 96.423  | 95.702   |

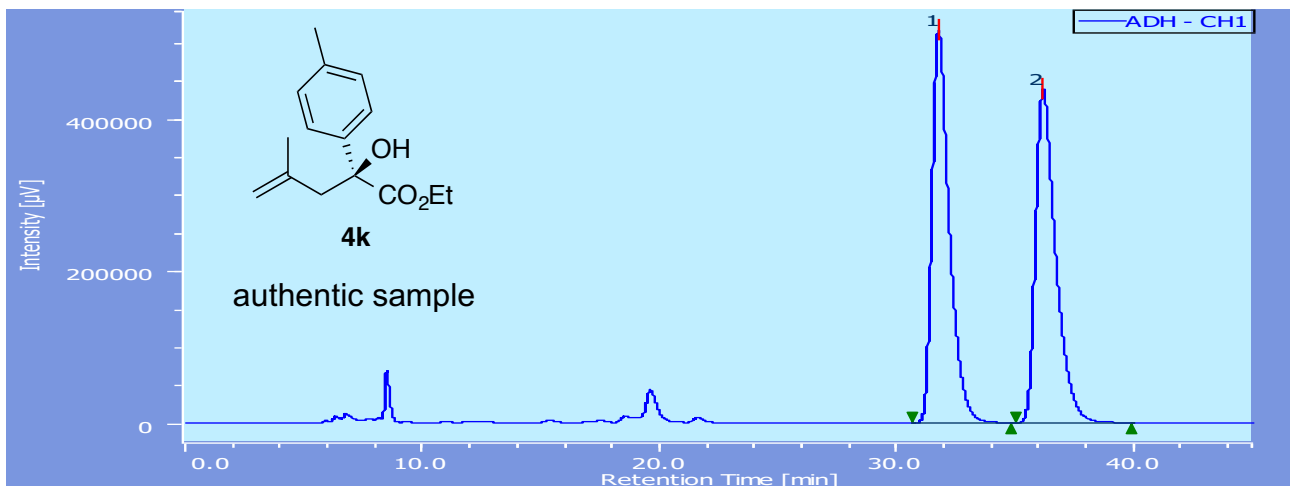

| peak | retention time | area     | hight  | area, % | hight, % |
|------|----------------|----------|--------|---------|----------|
| 1    | 31.717         | 26189284 | 514999 | 50.316  | 54.065   |
| 2    | 36.117         | 25860694 | 437561 | 49.684  | 45.935   |

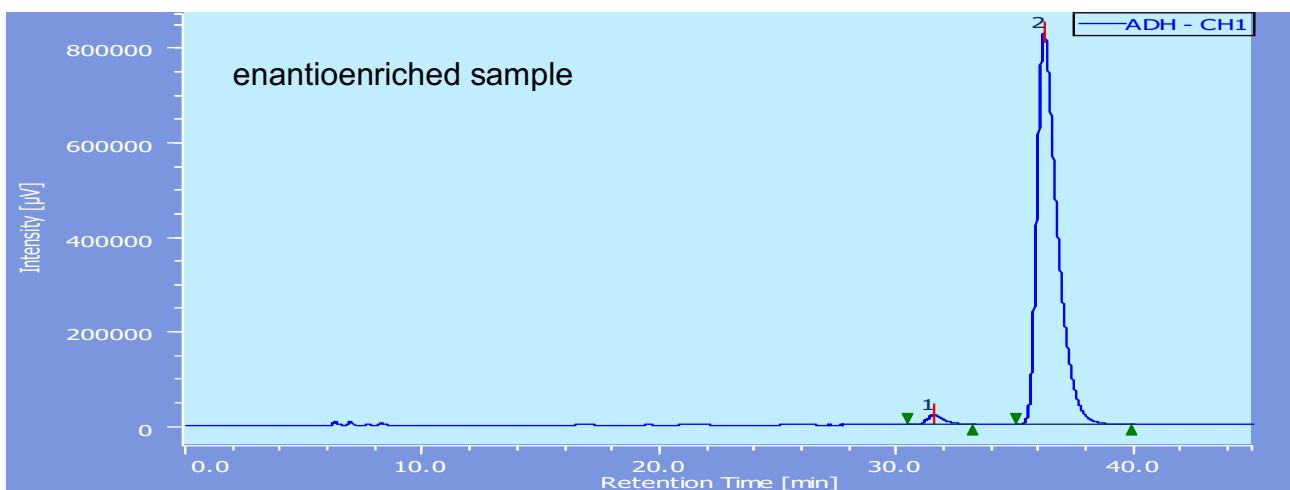

| peak | retention time | area     | hight  | area, % | hight, % |
|------|----------------|----------|--------|---------|----------|
| 1    | 31.508         | 1011904  | 19945  | 2.005   | 2.355    |
| 2    | 36.158         | 49459042 | 826878 | 97.995  | 97.645   |

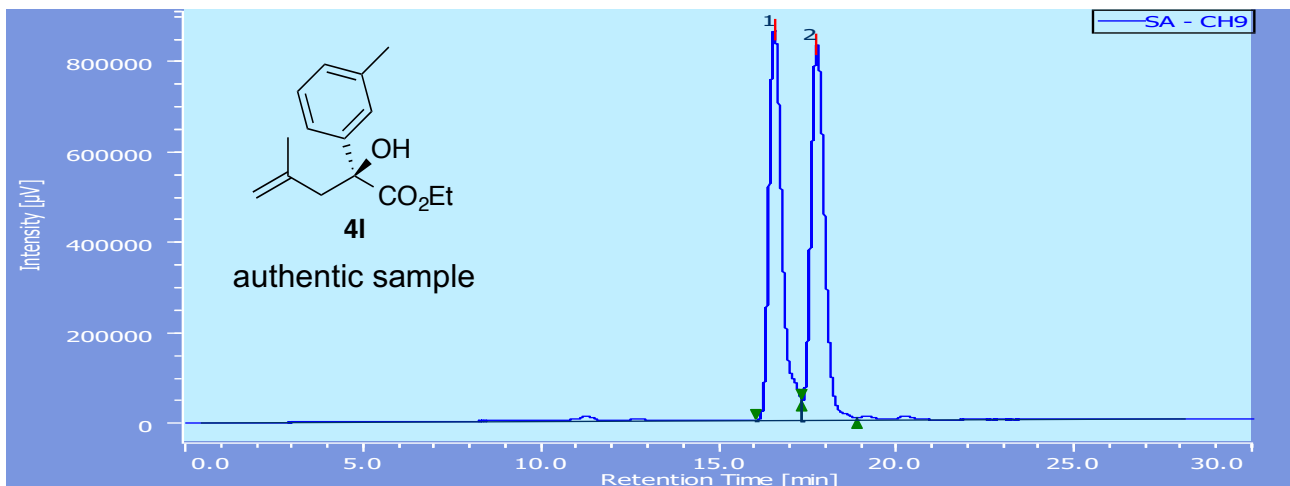

| peak | retention time | area     | hight  | area, % | hight, % |
|------|----------------|----------|--------|---------|----------|
| 1    | 16.537         | 22847496 | 862302 | 50.600  | 50.972   |
| 2    | 17.728         | 22305766 | 829403 | 49.400  | 49.028   |

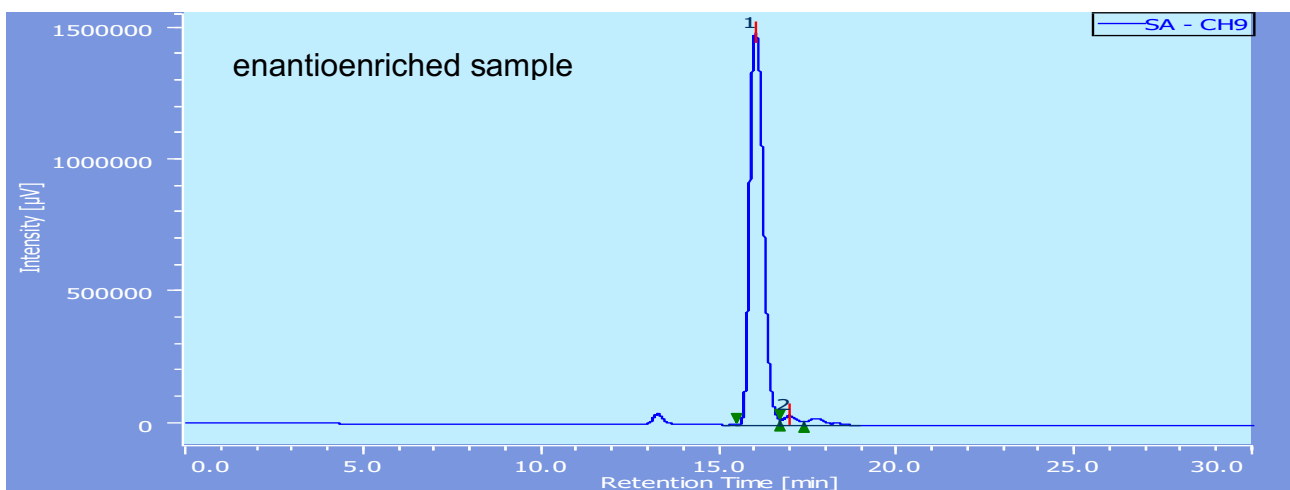

| peak | retention time | area     | hight   | area, % | hight, % |
|------|----------------|----------|---------|---------|----------|
| 1    | 16.007         | 39788699 | 1484510 | 97.709  | 97.603   |
| 2    | 16.950         | 933020   | 36455   | 2.291   | 2.397    |

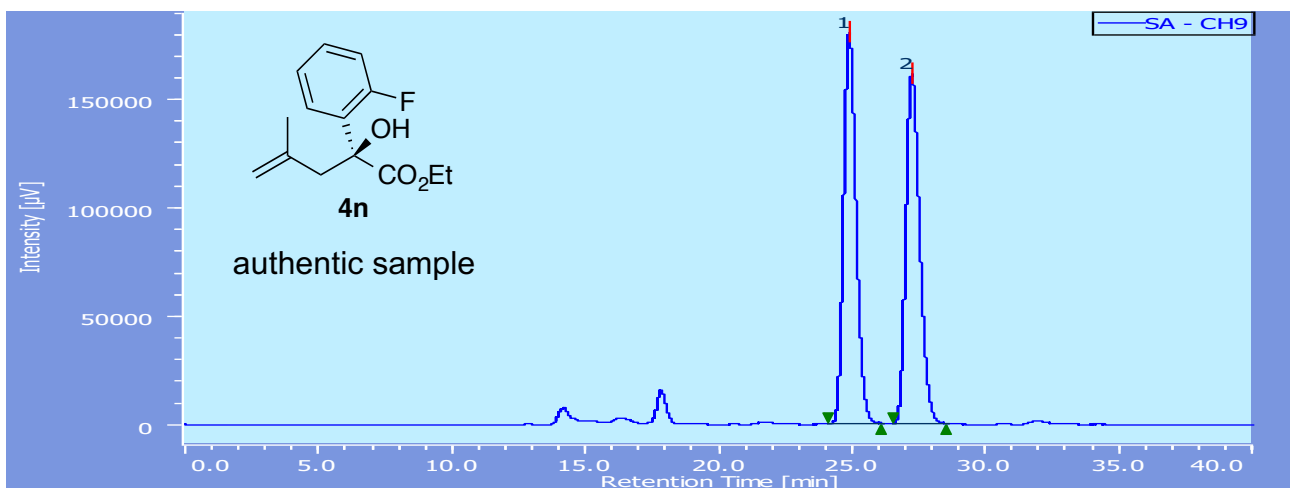

| peak | retention time | area    | hight  | area, % | hight, % |
|------|----------------|---------|--------|---------|----------|
| 1    | 24.845         | 5901268 | 180131 | 50.386  | 52.870   |
| 2    | 27.188         | 5810848 | 160576 | 49.614  | 47.130   |

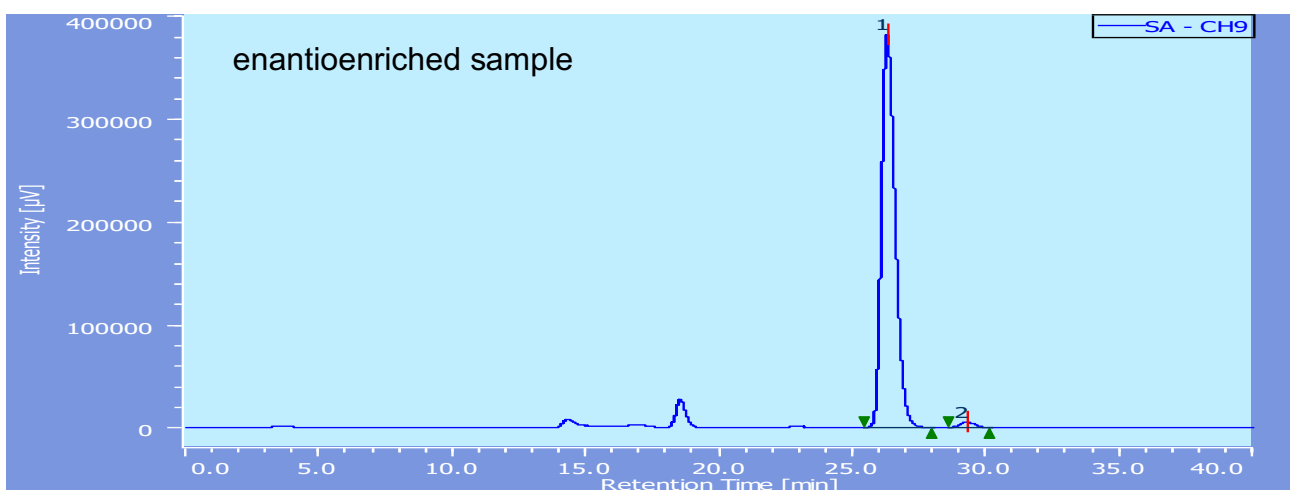

| peak | retention time | area     | hight  | area, % | hight, % |
|------|----------------|----------|--------|---------|----------|
| 1    | 26.267         | 13597157 | 381102 | 98.528  | 98.554   |
| 2    | 29.235         | 203158   | 5592   | 1.472   | 1.446    |

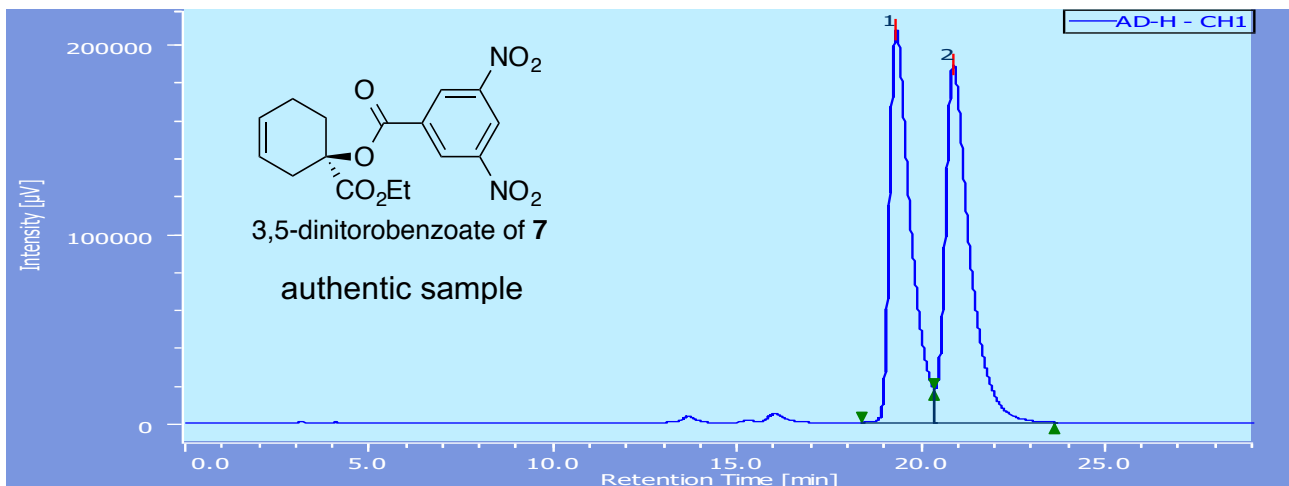

| peak | retention time | area    | hight  | area, % | hight, % |
|------|----------------|---------|--------|---------|----------|
| 1    | 19.292         | 8227189 | 206487 | 48.601  | 52.317   |
| 2    | 20.842         | 8700948 | 188198 | 51.399  | 47.683   |

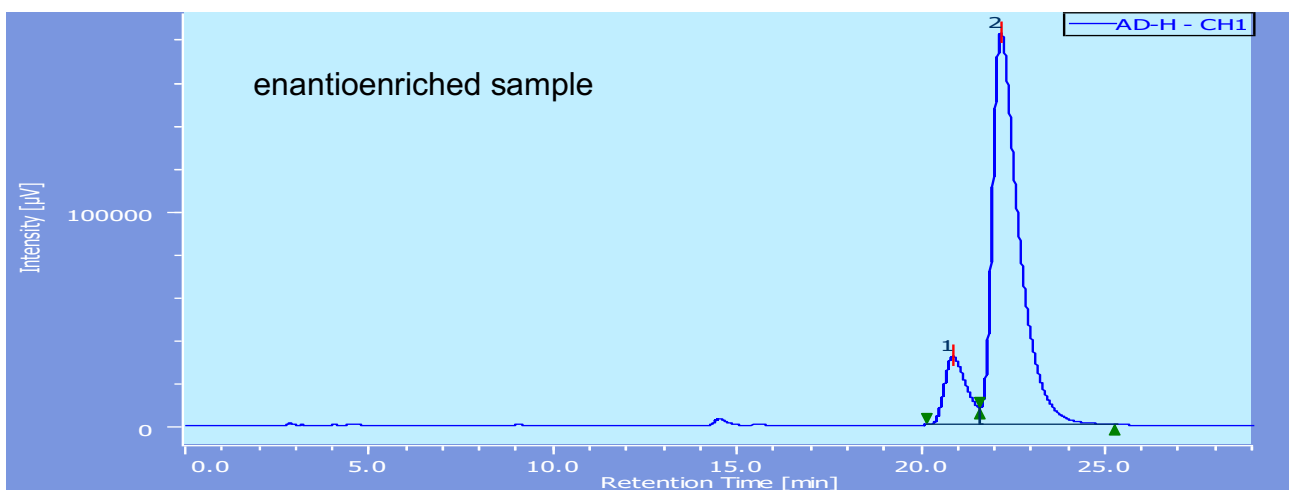

| peak | retention time | area    | hight  | area, % | hight, % |
|------|----------------|---------|--------|---------|----------|
| 1    | 20.825         | 1329447 | 31711  | 12.687  | 14.836   |
| 2    | 22.133         | 9149491 | 182036 | 87.313  | 85.164   |

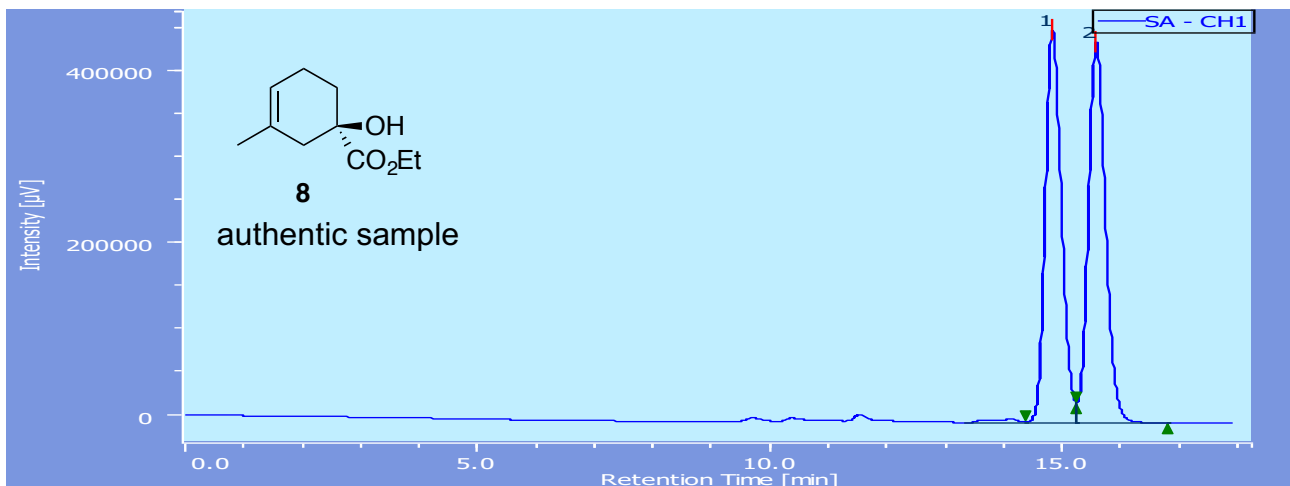

| peak | retention time | area    | hight  | area, % | hight, % |
|------|----------------|---------|--------|---------|----------|
| 1    | 14.808         | 8724701 | 456075 | 49.242  | 50.819   |
| 2    | 15.550         | 8993172 | 441371 | 50.758  | 49.181   |

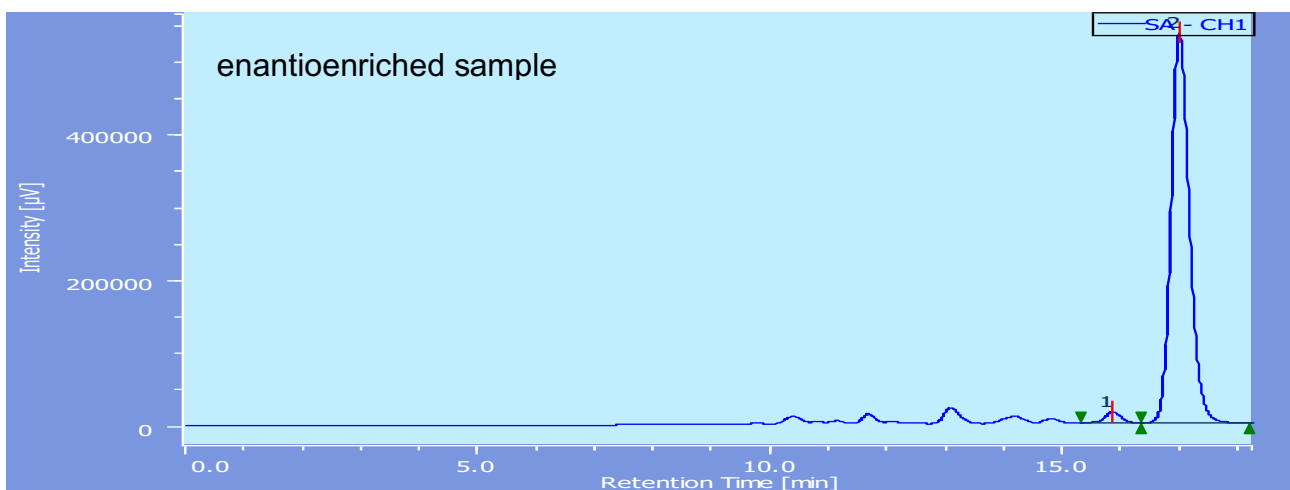

| peak | retention time | area     | hight  | area, % | hight, % |
|------|----------------|----------|--------|---------|----------|
| 1    | 15.833         | 329463   | 15799  | 2.722   | 2.870    |
| 2    | 16.967         | 11772604 | 534613 | 97.278  | 97.130   |
